# Supplementary material for: Identification of the early and late responder genes during the generation of induced pluripotent stem cells from mouse fibroblasts
Source: PubMed Central journal article supplement (PMC5289558; doi:10.1371/journal.pone.0171300), 2017-02-02

# S1 Fig

## A

### H3K4me3

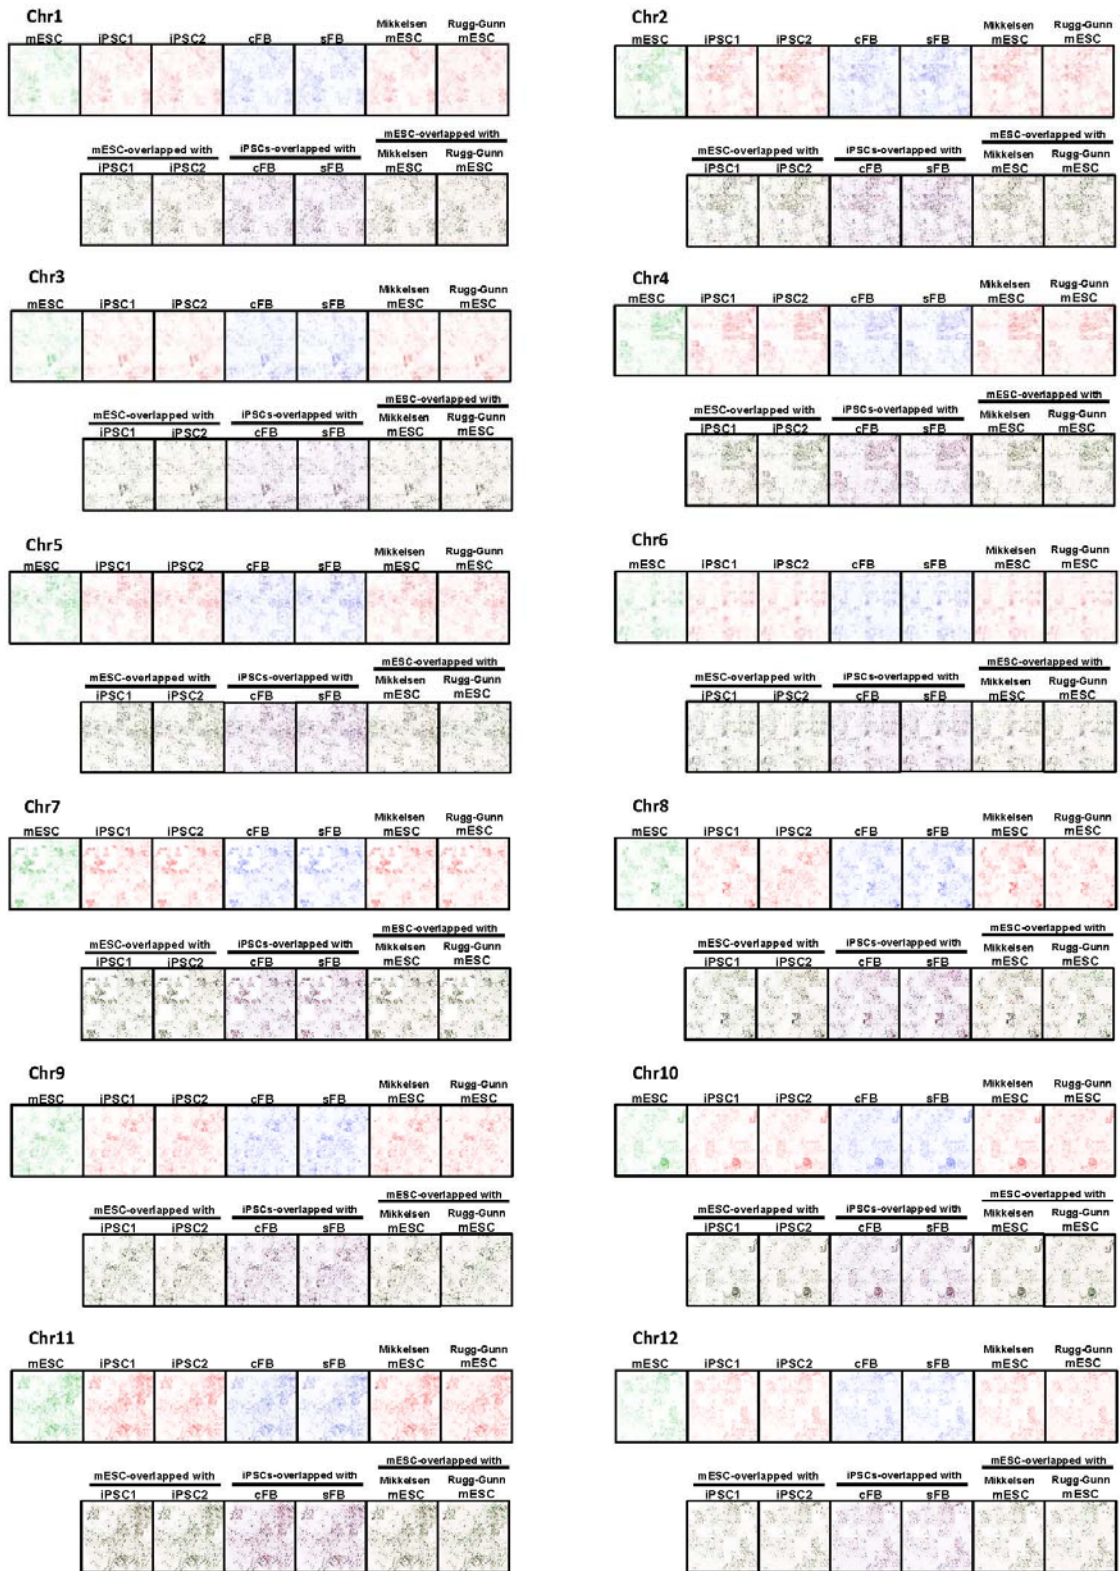

S1 Fig

**A (continued)**

H3K4me3

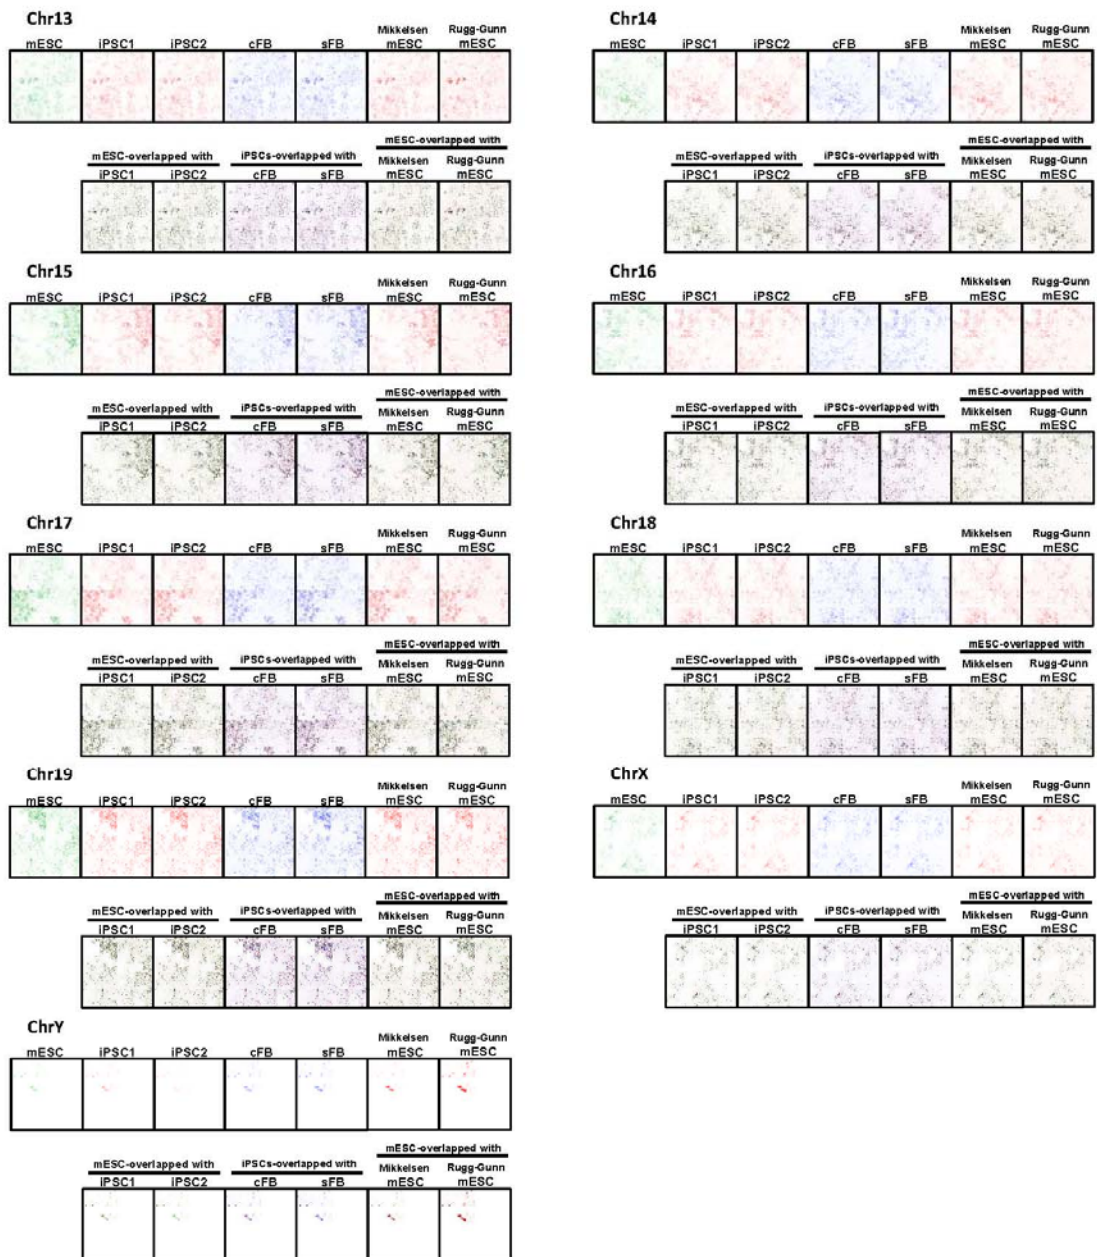



S1 Fig

**B**

H3K27me3

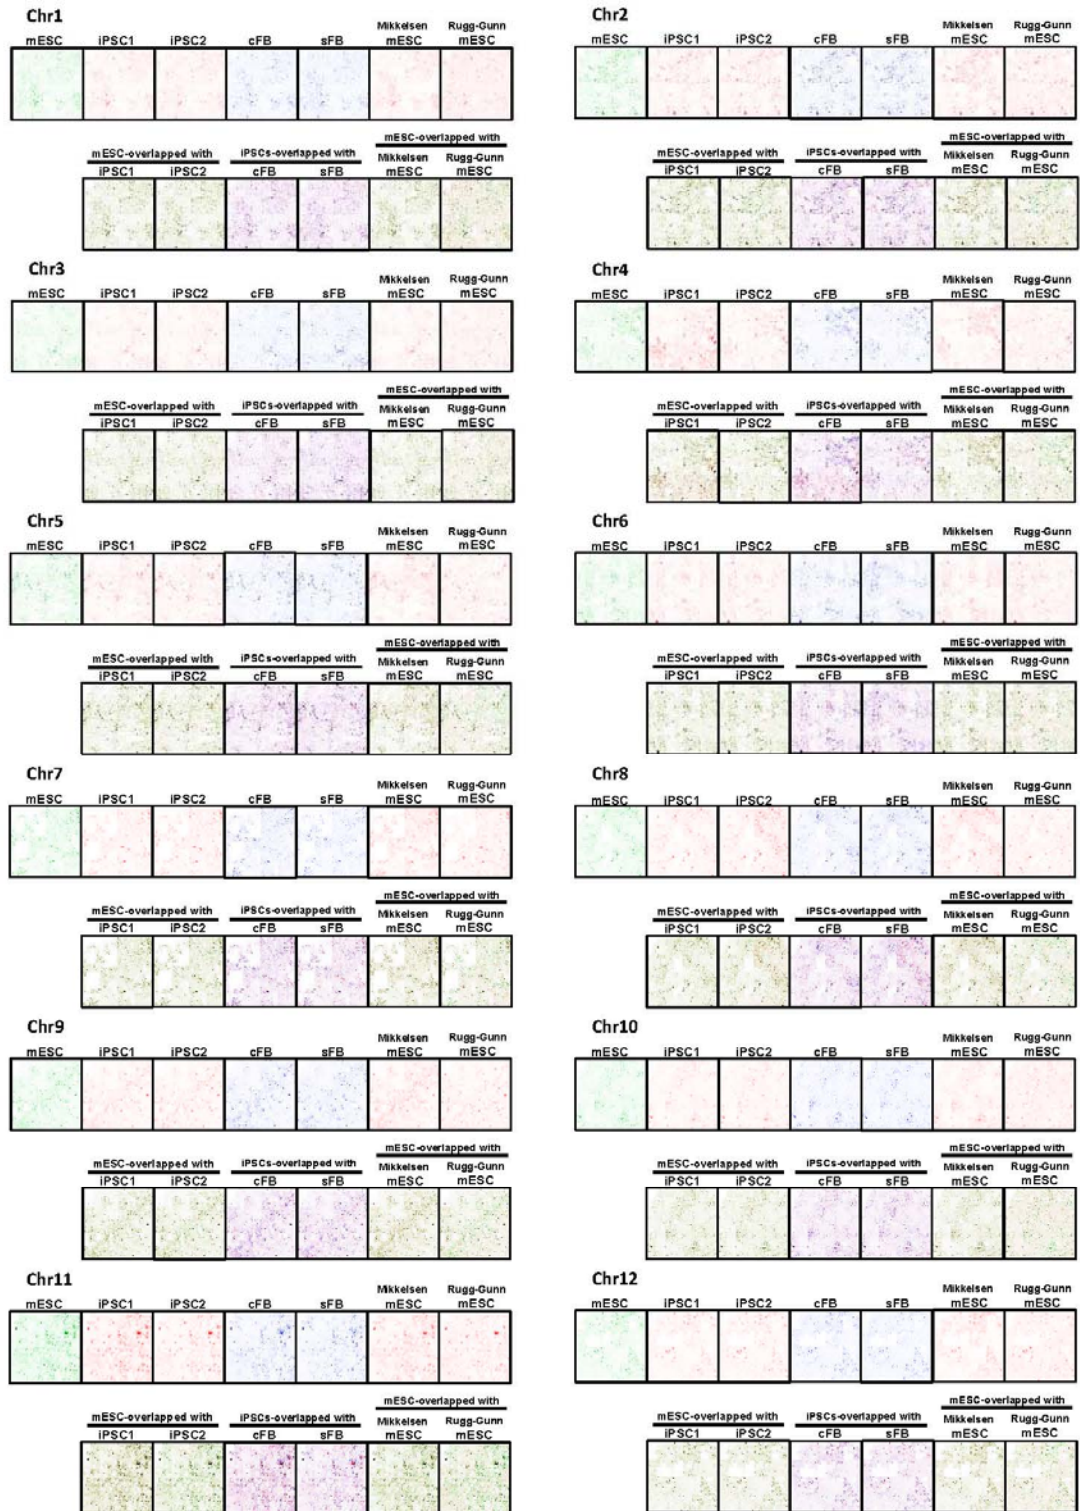

S1 Fig

## B (continued)

H3K27me3

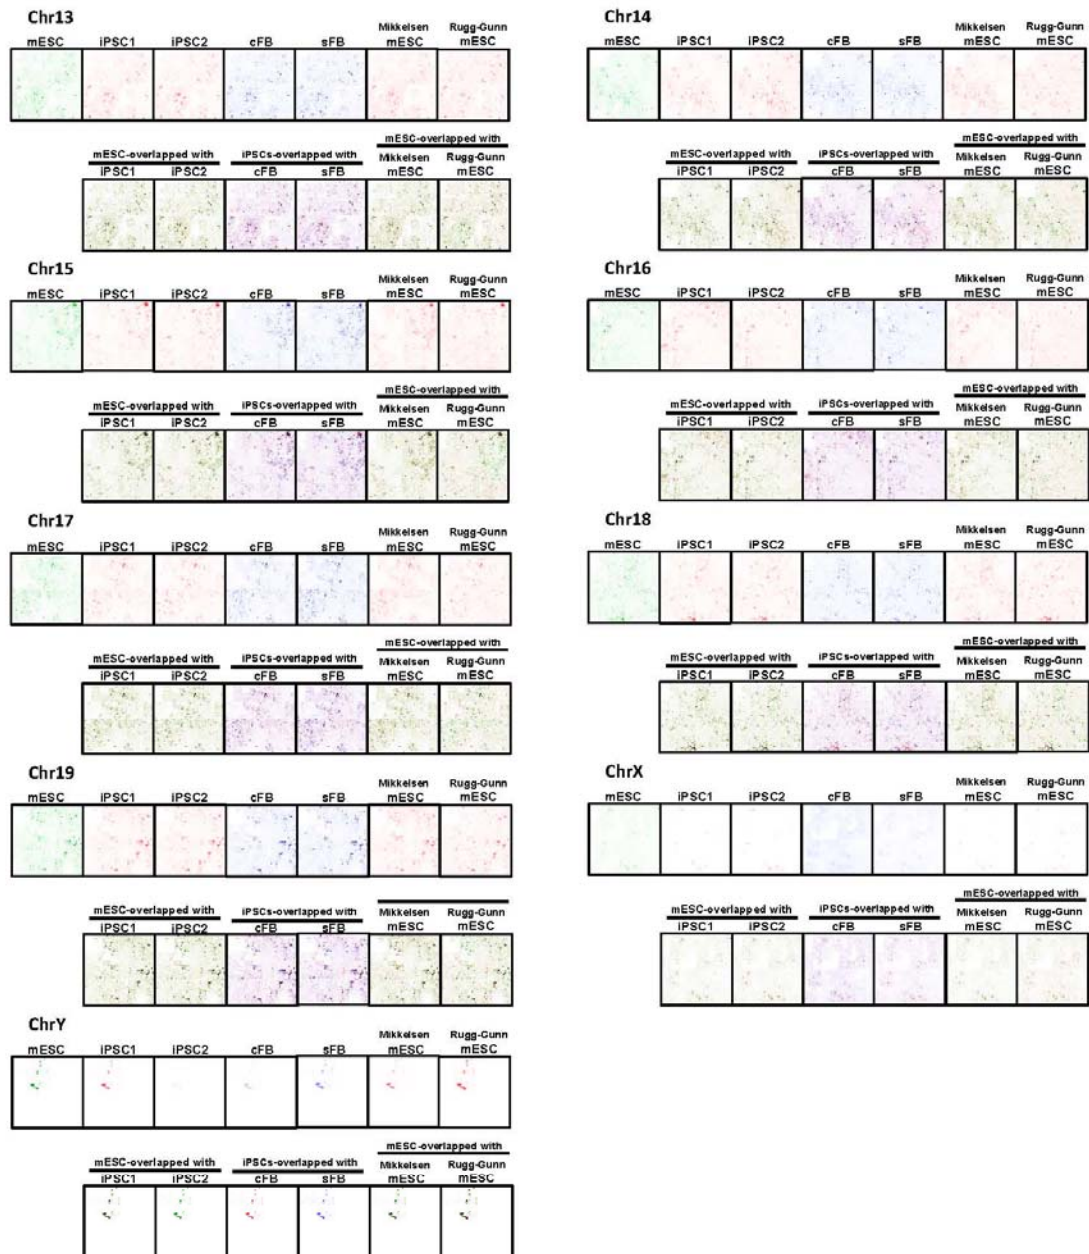



# S1 Fig

## C

### H3K4me3

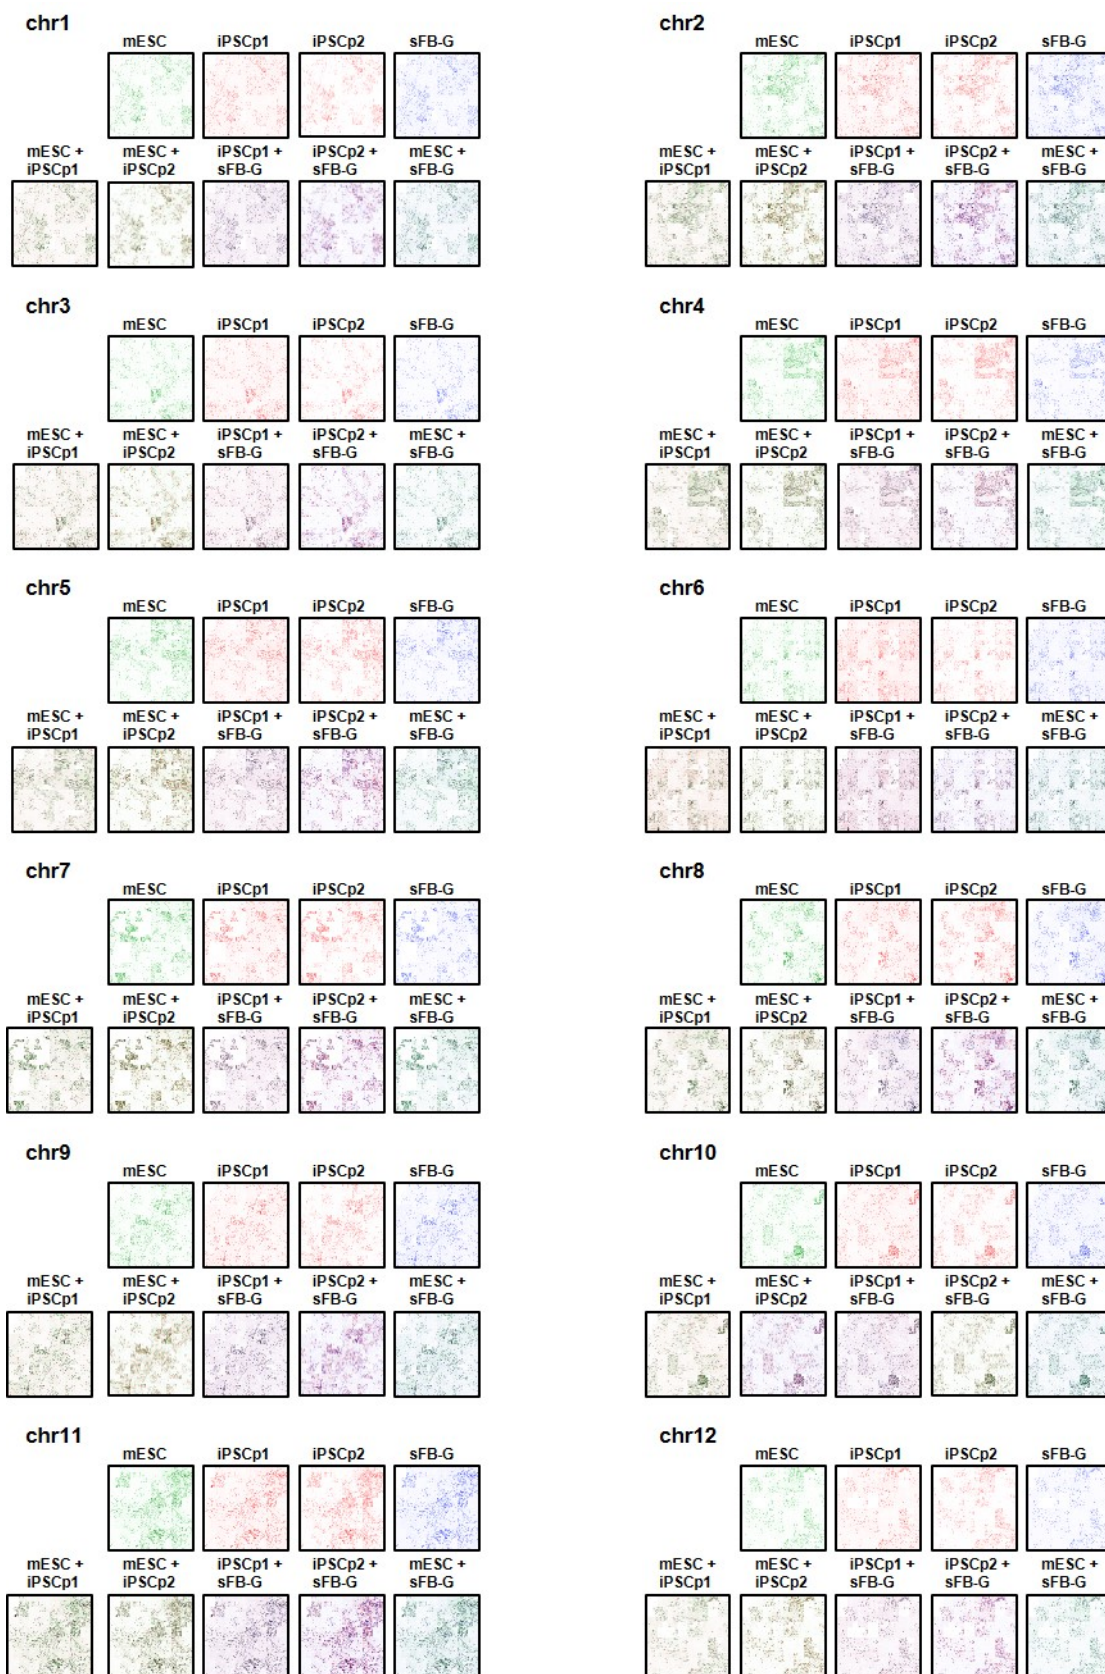

# S1 Fig

## C (continued)

### H3K4me3

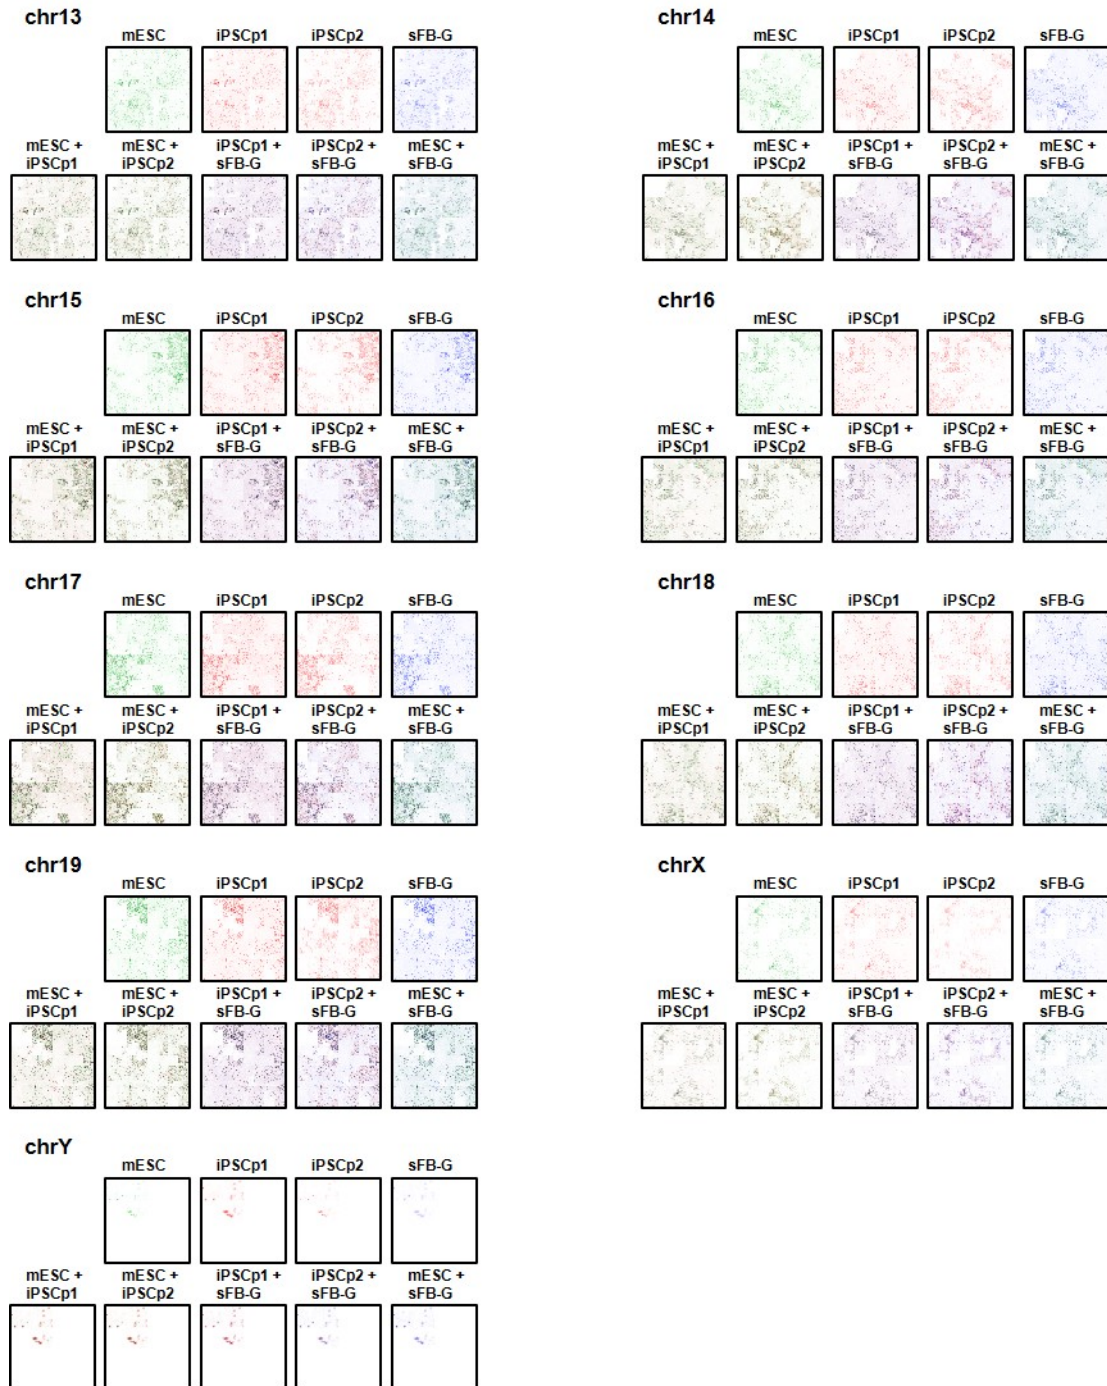



# S1 Fig

## D

### H3K27me3

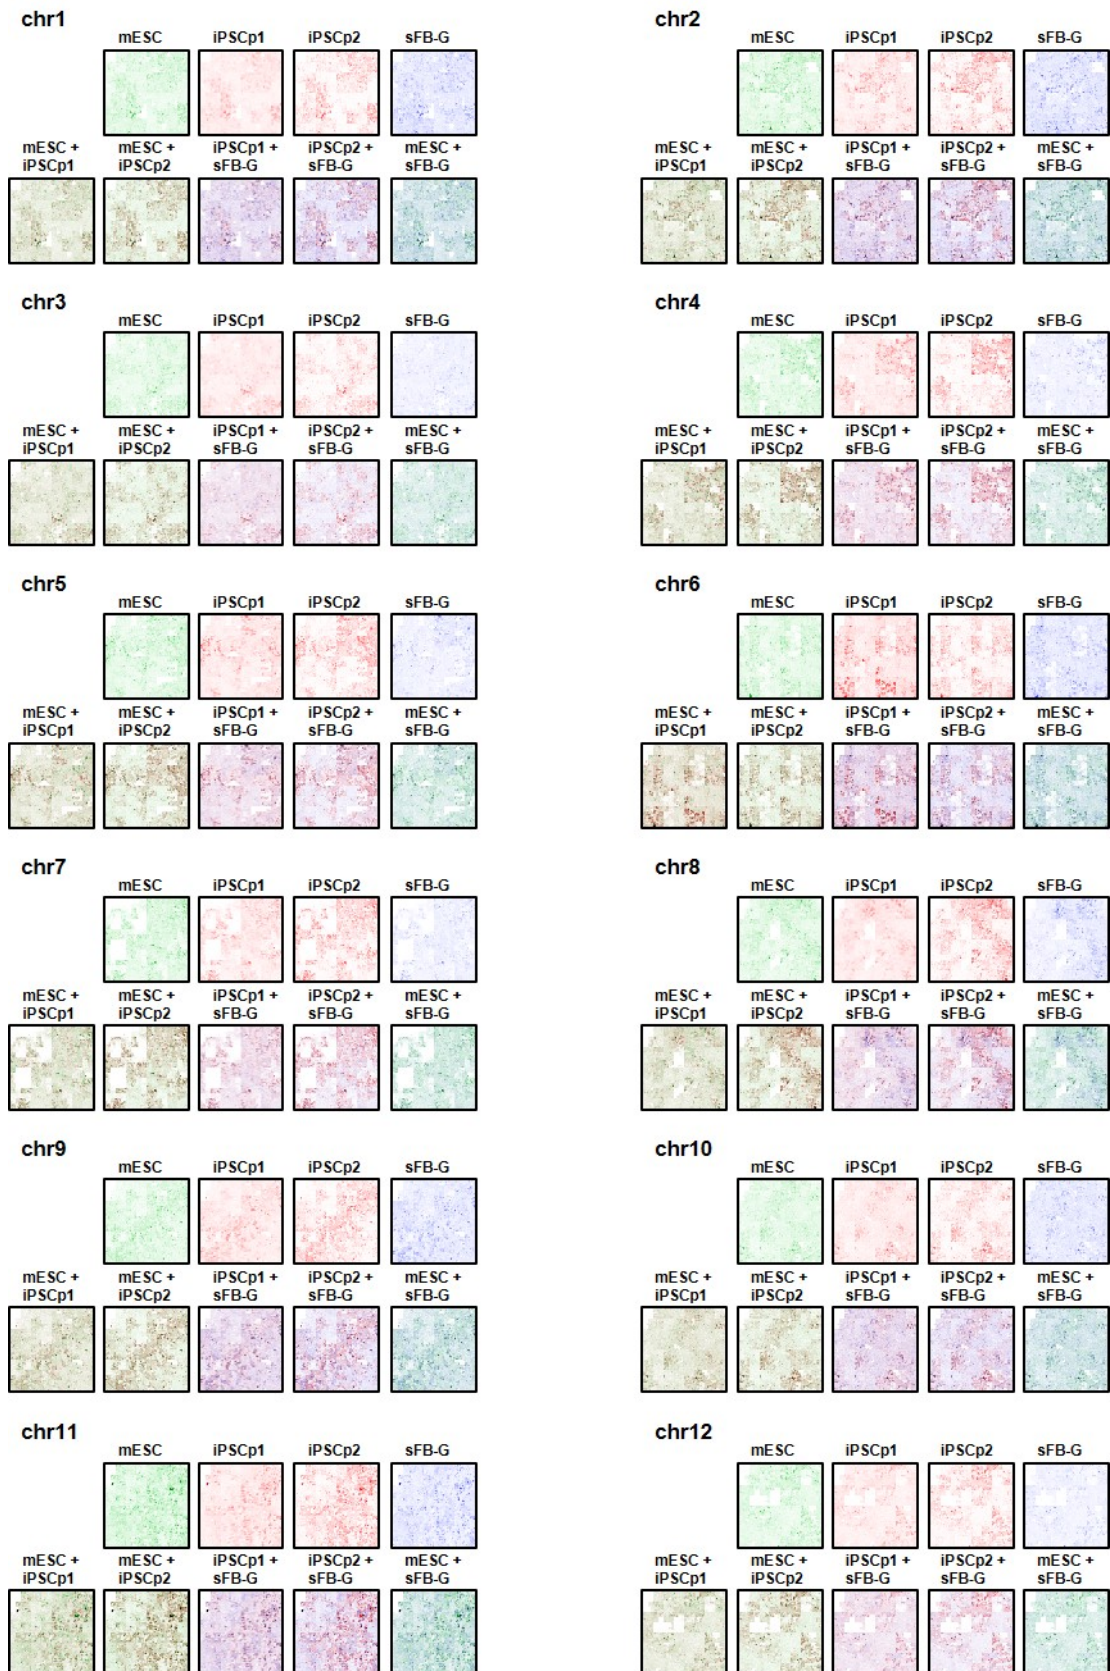

# S1 Fig

## D (continued)

H3K27me3

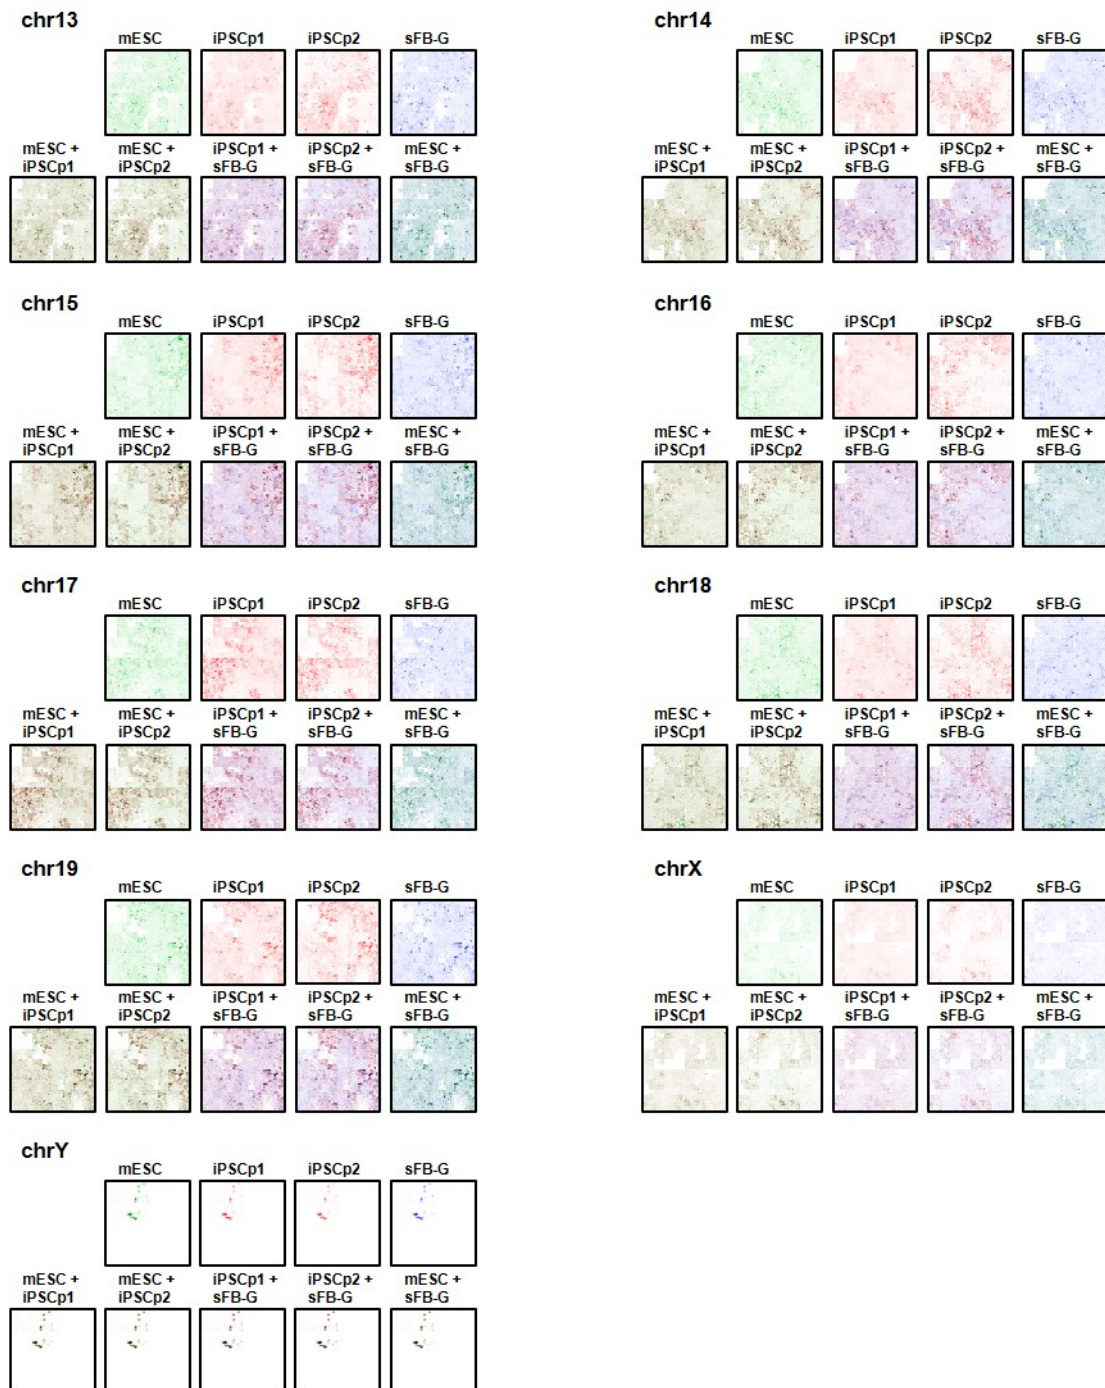

Supplement: pone.0171300.s001.pdf [file pone.0171300.s001.pdf]
