# Supplementary material for: Identification of the early and late responder genes during the generation of induced pluripotent stem cells from mouse fibroblasts
Source: PubMed Central journal article supplement (PMC5289558; doi:10.1371/journal.pone.0171300), 2017-02-02

S4 Fig

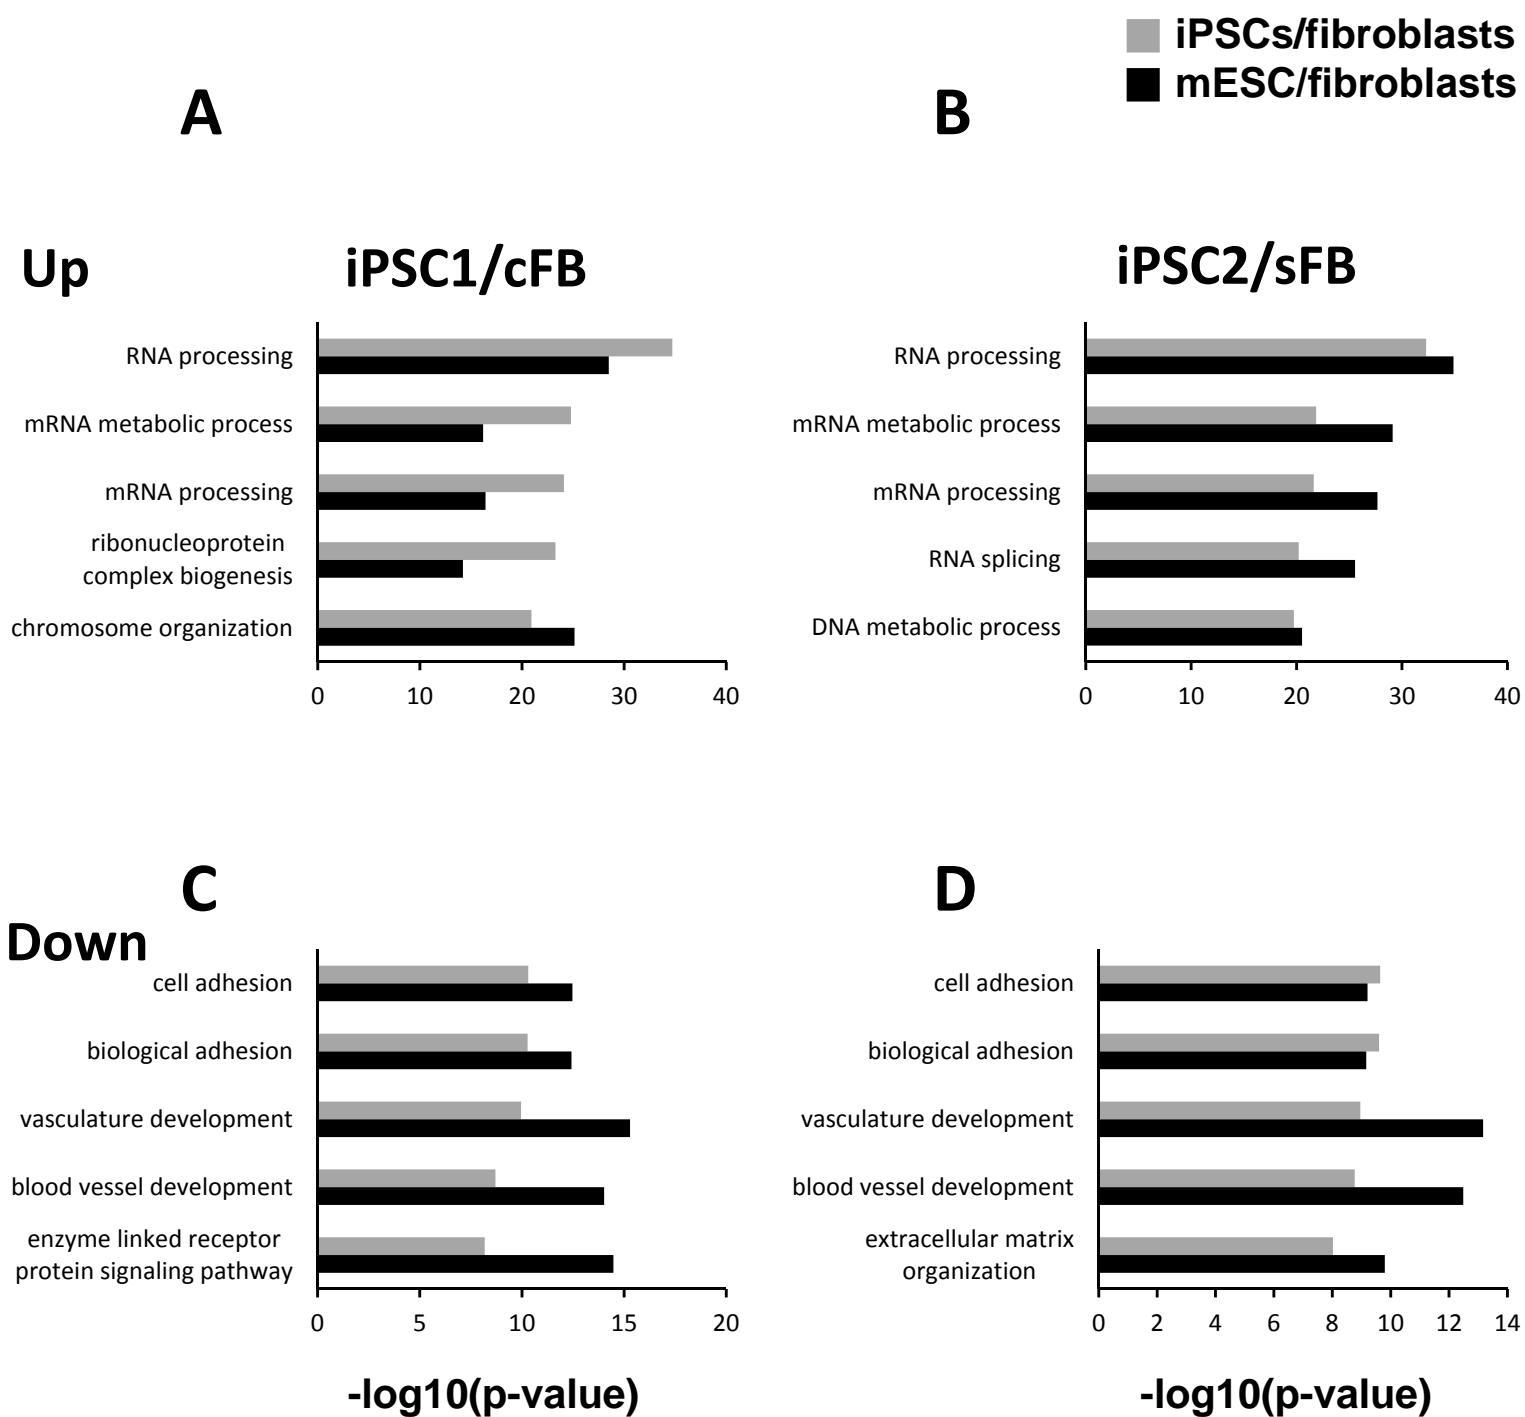

Supplement: pone.0171300.s004.pdf [file pone.0171300.s004.pdf]
