# Supplementary material for: Identification of the early and late responder genes during the generation of induced pluripotent stem cells from mouse fibroblasts
Source: PubMed Central journal article supplement (PMC5289558; doi:10.1371/journal.pone.0171300), 2017-02-02
Supplement: pone.0171300.s006.pdf [file pone.0171300.s006.pdf]

# S6 Fig

A

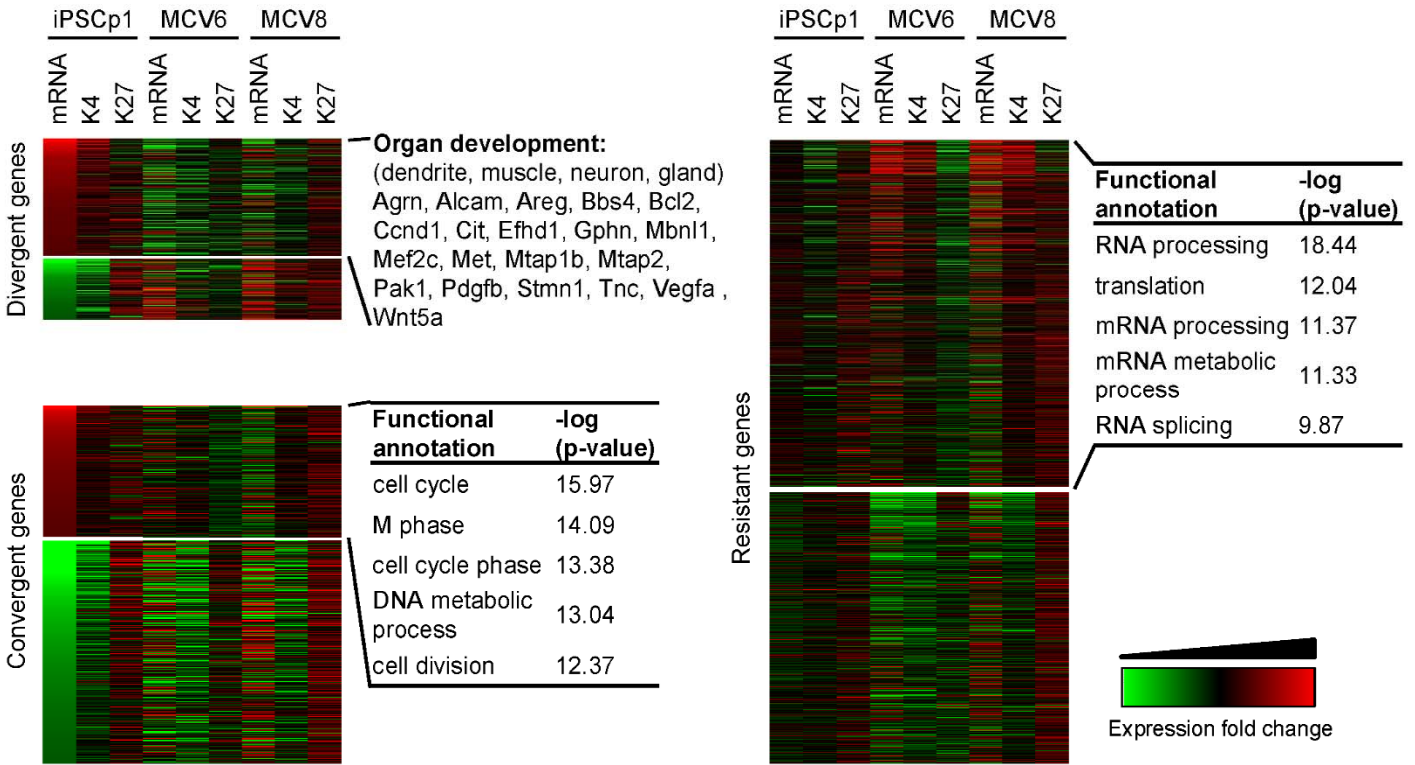

B

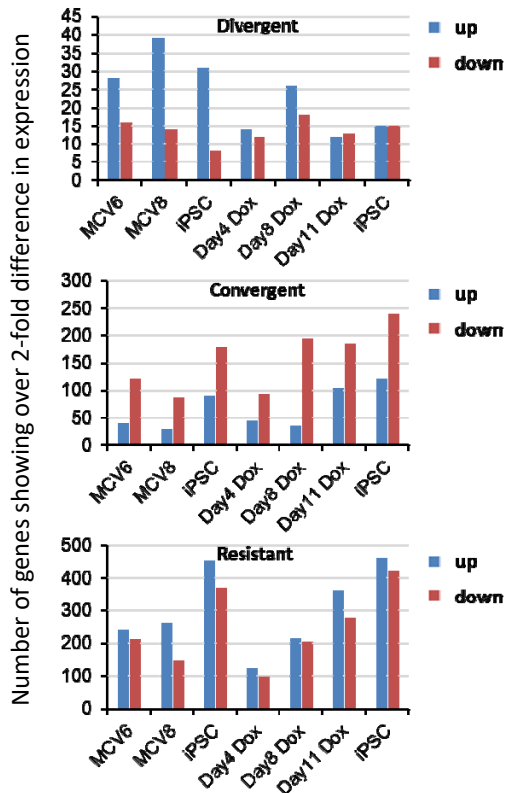

\* MCV6 and MCV8 data obtained from Nature. 2008 Jul 3;454(7200):49-55

\* Day4, 8, 11 Dox and IPSC in Fig. S6B from Nature. 2013 Oct 3;502 (7469):65-70
