# Supplementary material for: Identification of the early and late responder genes during the generation of induced pluripotent stem cells from mouse fibroblasts
Source: PubMed Central journal article supplement (PMC5289558; doi:10.1371/journal.pone.0171300), 2017-02-02
Supplement: pone.0171300.s007.pdf [file pone.0171300.s007.pdf]

**S1 Table. Divergent up**

| Gene information |             | mRNA fold change |            | H3K4me3 enrichment |       |       | H3K27me3 enrichment |       |       |
|------------------|-------------|------------------|------------|--------------------|-------|-------|---------------------|-------|-------|
| RefSeq gene      | gene symbol | iPSCp/sFB-G      | mESC/sFB-G | mESC               | iPSCp | sFB-G | mESC                | iPSCp | sFB-G |
| NM_010203        | Fgf5        | 3.940            | -2.189     | 1220               | 14664 | 231   | 2803                | 681   | 1029  |
| NM_007945        | Eps8        | 3.611            | 0.408      | 4649               | 14311 | 5786  | 3765                | 5085  | 3886  |
| NM_133719        | Metrn       | 3.282            | 0.195      | 1752               | 5569  | 2422  | 142                 | 191   | 78    |
| NM_009704        | Areg        | 3.212            | 0.387      | 513                | 933   | 353   | 1067                | 445   | 841   |
| NM_007421        | Adssl1      | 3.123            | 0.115      | 2186               | 3530  | 1215  | 2344                | 738   | 561   |
| NM_029662        | Mfsd2       | 2.984            | 0.296      | 693                | 1972  | 1022  | 2020                | 447   | 405   |
| NM_016701        | Nes         | 2.876            | -0.143     | 2785               | 9597  | 450   | 3049                | 381   | 730   |
| NM_011857        | Odz3        | 2.772            | -0.679     | 8668               | 5982  | 2422  | 14173               | 11381 | 11713 |
| NM_177914        | Dgkk        | 2.708            | -0.028     | 382                | 1186  | 498   | 2424                | 3310  | 3806  |
| NM_001001979     | Megf10      | 2.688            | -1.514     | 1670               | 3940  | 2099  | 6047                | 3770  | 9223  |
| NM_028186        | Nkd2        | 2.648            | -1.535     | 3074               | 4983  | 2588  | 2941                | 1305  | 1775  |
| NM_032400        | Sucnr1      | 2.638            | -0.014     | 10                 | 895   | 20    | 231                 | 90    | 138   |
| NM_008846        | Pip5k1b     | 2.536            | -0.038     | 10362              | 10663 | 9071  | 9332                | 11147 | 10869 |
| NM_011990        | Slc7a11     | 2.527            | -1.295     | 223                | 2204  | 706   | 2361                | 1642  | 1110  |
| NM_011252        | Rbmx        | 2.504            | -0.583     | 1638               | 2395  | 2093  | 38                  | 50    | 70    |
| NM_011267        | Rgs16       | 2.458            | -1.689     | 1025               | 13659 | 2908  | 812                 | 223   | 154   |
| NM_001033484     | Iqgap3      | 2.421            | 0.205      | 1993               | 1849  | 1069  | 947                 | 941   | 361   |
| NM_025282        | Mef2c       | 2.409            | -0.503     | 1254               | 7683  | 2398  | 6786                | 3785  | 6653  |
| NM_175096        | Stbd1       | 2.381            | -0.304     | 1414               | 1747  | 1372  | 700                 | 536   | 170   |
| NM_007603        | Capn6       | 2.366            | -0.760     | 134                | 968   | 154   | 541                 | 645   | 906   |
| NM_025459        | Fam134b     | 2.357            | 0.601      | 247                | 394   | 291   | 1291                | 1051  | 3471  |
| NM_027881        | Osbp13      | 2.351            | 0.578      | 946                | 1618  | 842   | 2173                | 2678  | 2229  |
| NM_008632        | Mtap2       | 2.251            | 0.151      | 2348               | 2998  | 2107  | 8290                | 5287  | 11928 |
| NM_008398        | Itga7       | 2.237            | -0.191     | 1280               | 3941  | 912   | 2205                | 874   | 927   |
| NM_019971        | Pdgfc       | 2.220            | 0.189      | 4546               | 7310  | 4110  | 3927                | 3144  | 2983  |

|              |               |       |        |      |       |      |      |      |       |
|--------------|---------------|-------|--------|------|-------|------|------|------|-------|
| NM_178772    | Aadacl1       | 2.152 | -1.347 | 2970 | 5218  | 3072 | 1725 | 1432 | 839   |
| NM_013703    | Vldlr         | 2.138 | 0.003  | 3122 | 4799  | 2751 | 2214 | 1399 | 2442  |
| NM_001012401 | Hspb6         | 2.137 | -1.803 | 1280 | 2364  | 1465 | 86   | 14   | 61    |
| NM_008343    | Igfbp3        | 2.039 | 0.822  | 2983 | 2929  | 1582 | 1627 | 469  | 1328  |
| NM_009610    | Actg2         | 2.007 | -1.415 | 245  | 489   | 264  | 1343 | 1661 | 1785  |
| NM_133897    | Lrrc8c        | 1.981 | 0.351  | 3413 | 6296  | 2230 | 3010 | 3150 | 1456  |
| NM_021604    | Agrn          | 1.973 | 0.585  | 1211 | 413   | 119  | 522  | 465  | 247   |
| NM_011057    | Pdgfb         | 1.946 | -0.072 | 4538 | 8332  | 3614 | 3685 | 1646 | 2827  |
| NM_019634    | Tspan7        | 1.925 | -0.432 | 791  | 1694  | 1316 | 1879 | 1971 | 2243  |
| NM_145990    | Cdk5rap2      | 1.912 | 0.790  | 4077 | 5060  | 2599 | 3834 | 5114 | 3517  |
| NM_013749    | Tnfrsf12a     | 1.902 | -0.097 | 2671 | 5874  | 4741 | 491  | 201  | 208   |
| NM_133187    | 1110032E23Rik | 1.902 | -1.427 | 532  | 10719 | 3016 | 1679 | 901  | 790   |
| NM_016721    | Iqgap1        | 1.846 | 0.129  | 5018 | 6566  | 4095 | 2117 | 1642 | 913   |
| NM_028889    | Efhd1         | 1.839 | 0.453  | 2647 | 1141  | 1146 | 4676 | 2448 | 5118  |
| NM_021278    | Tmsb4x        | 1.816 | 0.064  | 1593 | 3022  | 2095 | 59   | 25   | 41    |
| NM_144862    | Lims2         | 1.808 | -0.950 | 2255 | 2210  | 2027 | 3117 | 1262 | 1923  |
| NM_013468    | Ankrd1        | 1.795 | 0.829  | 52   | 728   | 75   | 509  | 354  | 341   |
| NM_027711    | Iqgap2        | 1.792 | 0.852  | 4363 | 4314  | 3924 | 9400 | 8232 | 14594 |
| NM_009468    | Dpysl3        | 1.790 | 0.165  | 3018 | 3030  | 2468 | 2001 | 1455 | 2350  |
| NM_172628    | Sh3tc2        | 1.783 | 0.108  | 870  | 2650  | 1269 | 2184 | 1729 | 1872  |
| NM_008761    | Fxyd5         | 1.776 | -1.063 | 215  | 1448  | 1249 | 1154 | 200  | 90    |
| NM_007631    | Ccnd1         | 1.775 | -0.985 | 4410 | 6369  | 3360 | 1274 | 294  | 35    |
| NM_019972    | Sort1         | 1.772 | 0.423  | 2618 | 3026  | 1696 | 2859 | 2461 | 1493  |
| NM_011828    | Hs2st1        | 1.753 | -0.274 | 6372 | 8953  | 5425 | 2887 | 2819 | 1544  |
| NM_007498    | Atf3          | 1.749 | -1.220 | 4801 | 6138  | 4544 | 2547 | 323  | 816   |
| NM_021324    | Ttyh1         | 1.747 | -0.297 | 2026 | 2769  | 983  | 642  | 879  | 423   |
| NM_207650    | Dtna          | 1.738 | 0.354  | 1373 | 5935  | 1814 | 7589 | 6963 | 12891 |
| NM_008641    | Mast2         | 1.735 | -0.482 | 3085 | 5056  | 3068 | 2390 | 2458 | 1926  |
| NM_172637    | Hectd2        | 1.734 | -0.336 | 3577 | 3706  | 3516 | 2292 | 1961 | 2643  |

|              |               |       |        |      |       |       |      |      |      |
|--------------|---------------|-------|--------|------|-------|-------|------|------|------|
| NM_011123    | Plp1          | 1.724 | -1.824 | 20   | 2995  | 116   | 229  | 465  | 203  |
| NM_008216    | Has2          | 1.700 | -0.945 | 1504 | 6351  | 5254  | 1573 | 878  | 1193 |
| NM_009103    | Rrm1          | 1.693 | 0.834  | 2536 | 3352  | 2082  | 324  | 505  | 434  |
| NM_023476    | Tinagl        | 1.661 | 0.075  | 798  | 1095  | 774   | 1558 | 462  | 174  |
| NM_207209    | Sec24b        | 1.657 | -0.471 | 3218 | 5923  | 3496  | 1287 | 1325 | 853  |
| NM_011824    | Grem1         | 1.649 | -2.505 | 2075 | 6171  | 4699  | 1974 | 320  | 1042 |
| NM_052993    | C1galt1       | 1.647 | -0.303 | 1593 | 7725  | 3624  | 601  | 935  | 744  |
| NM_080558    | Ssfa2         | 1.620 | -0.584 | 4454 | 6860  | 4729  | 953  | 474  | 892  |
| NM_009784    | Cacna2d1      | 1.619 | 0.416  | 3230 | 4884  | 2649  | 9365 | 8663 | 7699 |
| NM_019636    | Tbc1d1        | 1.615 | 0.785  | 7098 | 8883  | 5554  | 8068 | 4218 | 2277 |
| NM_197990    | 1700025G04Rik | 1.615 | -0.310 | 5110 | 5759  | 6518  | 6926 | 4305 | 5618 |
| NM_011893    | Sh3bp2        | 1.613 | -1.440 | 3287 | 5334  | 4311  | 2651 | 1095 | 383  |
| NM_022890    | Cldn12        | 1.599 | 0.638  | 2601 | 5300  | 2694  | 281  | 188  | 117  |
| NM_013546    | Hebp1         | 1.594 | 0.218  | 2723 | 3001  | 1819  | 1602 | 1119 | 1052 |
| NM_001040088 | Sytl2         | 1.585 | -2.790 | 142  | 136   | 373   | 685  | 549  | 503  |
| NM_177876    | Vps37b        | 1.580 | 0.344  | 2928 | 5944  | 3621  | 657  | 673  | 216  |
| NM_026470    | Spata6        | 1.576 | -0.643 | 1612 | 4171  | 2129  | 1671 | 1422 | 1413 |
| NM_001033198 | Ankrd50       | 1.570 | 0.433  | 83   | 37    | 28    | 122  | 152  | 66   |
| NM_021389    | Sh3kbp1       | 1.569 | -2.082 | 705  | 2211  | 1419  | 5281 | 3599 | 3245 |
| NM_133942    | Plekha1       | 1.563 | 0.899  | 4123 | 4792  | 3201  | 1000 | 857  | 656  |
| NM_007610    | Casp2         | 1.561 | 0.168  | 2301 | 5861  | 3257  | 328  | 471  | 513  |
| NM_146150    | Nrd1          | 1.560 | 0.933  | 5030 | 5530  | 3655  | 1159 | 1056 | 745  |
| NM_027828    | Fam110c       | 1.558 | -0.397 | 1311 | 1569  | 1887  | 1036 | 602  | 582  |
| NM_011738    | Ywhah         | 1.531 | 0.544  | 3861 | 6686  | 2906  | 372  | 153  | 84   |
| NM_001081229 | Tsc22d2       | 1.529 | 0.137  | 7796 | 21298 | 11462 | 1337 | 757  | 800  |
| NM_008591    | Met           | 1.528 | -0.253 | 2430 | 8303  | 3844  | 4849 | 3049 | 2907 |
| NM_010699    | Ldha          | 1.526 | 0.655  | 1796 | 2975  | 2583  | 239  | 173  | 93   |
| NM_009415    | Tpi1          | 1.525 | 0.388  | 1283 | 6555  | 3701  | 70   | 156  | 49   |
| NM_009673    | Anxa5         | 1.515 | -2.982 | 2575 | 9197  | 3952  | 1595 | 741  | 204  |

|              |               |       |        |      |      |      |      |      |       |
|--------------|---------------|-------|--------|------|------|------|------|------|-------|
| NM_007943    | Eps15         | 1.513 | 0.433  | 2588 | 4326 | 2423 | 1933 | 1680 | 1206  |
| NM_007666    | Cdh6          | 1.508 | -0.191 | 2093 | 3884 | 1923 | 7457 | 4707 | 5045  |
| NM_008638    | Mthfd2        | 1.503 | 0.784  | 3546 | 7243 | 4285 | 165  | 529  | 285   |
| NM_011607    | Tnc           | 1.502 | -3.569 | 451  | 763  | 379  | 2186 | 1454 | 1041  |
| NM_172579    | Sipa1l1       | 1.502 | -0.076 | 1661 | 1599 | 1120 | 3810 | 4975 | 2953  |
| NM_025730    | Lrrk2         | 1.501 | -1.360 | 969  | 7548 | 4369 | 5489 | 4005 | 4144  |
| NM_178726    | Ppm1l         | 1.500 | 0.318  | 5023 | 4937 | 3472 | 7654 | 5138 | 4727  |
| NM_021385    | Rad18         | 1.482 | 0.414  | 3380 | 4892 | 2826 | 1233 | 1675 | 1567  |
| NM_009524    | Wnt5a         | 1.466 | -0.409 | 2702 | 5603 | 5601 | 5343 | 915  | 1184  |
| NM_030249    | Cttnbp2nl     | 1.450 | 0.085  | 2674 | 6305 | 3196 | 959  | 1064 | 535   |
| NM_008590    | Mest          | 1.428 | -0.603 | 163  | 1789 | 721  | 227  | 542  | 1358  |
| NM_019958    | Rgs17         | 1.423 | -0.321 | 2141 | 2066 | 3530 | 3834 | 3176 | 3036  |
| NM_007759    | Crabp2        | 1.420 | 0.852  | 583  | 592  | 161  | 974  | 128  | 375   |
| NM_009655    | Alcam         | 1.417 | -0.017 | 1903 | 5965 | 3204 | 5847 | 5001 | 14202 |
| NM_010833    | Msn           | 1.413 | -0.569 | 1126 | 6863 | 4283 | 821  | 851  | 844   |
| NM_175093    | Trib3         | 1.372 | 0.147  | 3657 | 7200 | 3269 | 305  | 128  | 136   |
| NM_027652    | D5Wsu178e     | 1.357 | 0.045  | 1862 | 4640 | 2956 | 1069 | 742  | 471   |
| NM_009274    | Srpk2         | 1.351 | 0.881  | 821  | 3471 | 1578 | 1961 | 2299 | 1564  |
| NM_016795    | Srpk1         | 1.351 | 0.995  | 5583 | 5565 | 6317 | 698  | 1026 | 645   |
| NM_138741    | Sdpr          | 1.342 | -1.098 | 189  | 3823 | 1601 | 877  | 267  | 503   |
| NM_013898    | Timm8a1       | 1.333 | 0.716  | 1178 | 1627 | 2021 | 37   | 40   | 38    |
| NM_145495    | Rin1          | 1.331 | -1.440 | 1822 | 6776 | 5216 | 560  | 232  | 186   |
| NM_011863    | Papss1        | 1.326 | -1.986 | 1730 | 3186 | 2033 | 1719 | 1821 | 746   |
| NM_001031814 | 2610207I05Rik | 1.325 | 0.009  | 5017 | 5243 | 3809 | 1252 | 2318 | 1458  |
| NM_172865    | Manea         | 1.323 | -1.741 | 2662 | 4186 | 2469 | 404  | 413  | 288   |
| NM_145494    | Me2           | 1.322 | -0.022 | 3276 | 4026 | 3652 | 1099 | 1392 | 1179  |
| NM_053123    | Smarca1       | 1.317 | 0.748  | 1312 | 1507 | 1250 | 1582 | 1527 | 2281  |
| NM_026883    | 1500011H22Rik | 1.308 | 0.901  | 4175 | 3140 | 2714 | 228  | 255  | 128   |
| NM_026632    | Rpa3          | 1.296 | 0.759  | 3583 | 4876 | 4286 | 60   | 84   | 66    |

|              |               |       |        |      |       |      |      |      |       |
|--------------|---------------|-------|--------|------|-------|------|------|------|-------|
| NM_025674    | Tcf19         | 1.295 | -1.164 | 1111 | 4234  | 4292 | 155  | 230  | 115   |
| NM_007948    | Erccl         | 1.292 | 0.913  | 2080 | 1627  | 1621 | 264  | 260  | 114   |
| NM_027418    | Mapk6         | 1.288 | -0.237 | 4321 | 8425  | 6088 | 516  | 720  | 457   |
| NM_133919    | Aff1          | 1.283 | 0.552  | 5347 | 8363  | 4858 | 3042 | 1845 | 1240  |
| NM_001038701 | Gabrb3        | 1.283 | 0.145  | 4514 | 2750  | 1166 | 5145 | 5025 | 4710  |
| NM_008654    | Myd116        | 1.282 | -0.665 | 3639 | 8660  | 4020 | 127  | 48   | 10    |
| NM_007837    | Ddit3         | 1.275 | -2.073 | 4333 | 14807 | 5858 | 160  | 193  | 114   |
| NM_010723    | Lmo4          | 1.269 | -1.697 | 3613 | 10137 | 5222 | 2678 | 336  | 205   |
| NM_019581    | Gtpbp2        | 1.267 | -1.649 | 2031 | 6670  | 3265 | 242  | 430  | 274   |
| NM_173402    | Rgs12         | 1.266 | 0.180  | 3543 | 4448  | 2985 | 3469 | 2261 | 1113  |
| NM_009017    | Raet1b        | 1.265 | 0.553  | 1309 | 2127  | 1472 | 5292 | 5753 | 4030  |
| NM_133348    | Acot7         | 1.264 | 0.341  | 3948 | 5514  | 3997 | 3228 | 2150 | 885   |
| NM_019390    | Lmna          | 1.261 | -1.241 | 1315 | 1980  | 879  | 1101 | 239  | 64    |
| NM_197981    | 5930416I19Rik | 1.254 | 0.745  | 3442 | 5546  | 3850 | 128  | 93   | 77    |
| NM_028979    | Cyp2j9        | 1.252 | -1.013 | 192  | 1624  | 597  | 600  | 682  | 551   |
| NM_011843    | Mbc2          | 1.246 | -0.453 | 4011 | 8391  | 6051 | 823  | 599  | 378   |
| NM_007836    | Gadd45a       | 1.233 | -0.098 | 7435 | 12399 | 5814 | 81   | 182  | 66    |
| NM_029437    | Ckap5         | 1.230 | -0.154 | 243  | 316   | 392  | 985  | 1124 | 1504  |
| NM_138747    | Nol1          | 1.228 | 0.654  | 5379 | 5461  | 4687 | 277  | 588  | 258   |
| NM_001034964 | Sorbs1        | 1.226 | -0.651 | 1976 | 4936  | 1391 | 2894 | 3208 | 3046  |
| NM_183315    | Ctxn1         | 1.217 | 0.448  | 2364 | 1931  | 1495 | 81   | 87   | 21    |
| NM_011877    | Ptpn21        | 1.217 | -0.589 | 1765 | 2645  | 1609 | 1929 | 1379 | 630   |
| NM_001025250 | Vegfa         | 1.216 | -0.349 | 5076 | 13563 | 9395 | 1352 | 546  | 391   |
| NM_011785    | Akt3          | 1.207 | -0.236 | 558  | 1099  | 1069 | 4504 | 3916 | 5867  |
| NM_026580    | Otub2         | 1.201 | 0.039  | 2070 | 3738  | 1910 | 519  | 539  | 241   |
| NM_010863    | Myo1b         | 1.196 | -0.071 | 6313 | 5091  | 5470 | 4229 | 4376 | 3972  |
| NM_019670    | Diap3         | 1.193 | 0.863  | 3978 | 4681  | 6076 | 7658 | 7978 | 12222 |
| NM_175306    | Phactr4       | 1.189 | 0.086  | 3564 | 4778  | 3060 | 1112 | 1335 | 590   |
| NM_177730    | Impad1        | 1.185 | 0.539  | 3531 | 4573  | 3363 | 456  | 520  | 377   |

|              |               |       |        |      |      |      |       |       |       |
|--------------|---------------|-------|--------|------|------|------|-------|-------|-------|
| NM_001040695 | Uevld         | 1.181 | 0.371  | 2828 | 2801 | 2346 | 542   | 637   | 392   |
| NM_009741    | Bcl2          | 1.180 | -0.260 | 3218 | 4654 | 3151 | 7103  | 4345  | 11450 |
| NM_008350    | Il11          | 1.176 | 0.306  | 898  | 630  | 530  | 1088  | 253   | 255   |
| NM_198111    | Akap6         | 1.173 | -0.283 | 2762 | 6143 | 2209 | 16384 | 11053 | 12154 |
| NM_029166    | Uhrf1bp1l     | 1.172 | -0.003 | 2953 | 5628 | 4011 | 1477  | 1938  | 1726  |
| NM_011319    | Sars          | 1.167 | 0.673  | 3997 | 7012 | 3054 | 311   | 379   | 184   |
| NM_030723    | Pum2          | 1.165 | 0.778  | 3199 | 5239 | 2630 | 1078  | 1661  | 1269  |
| NM_053090    | Drctnnb1a     | 1.161 | -0.556 | 3753 | 4325 | 3523 | 2049  | 1549  | 881   |
| NM_008188    | Thumpd3       | 1.157 | 0.710  | 4747 | 6921 | 4199 | 274   | 640   | 579   |
| NM_026384    | Dgat2         | 1.155 | 0.355  | 1335 | 1460 | 1081 | 2720  | 963   | 545   |
| NM_008862    | Pkia          | 1.154 | -2.218 | 1232 | 2432 | 1424 | 2104  | 1366  | 1190  |
| NM_009029    | Rb1           | 1.153 | 0.592  | 5531 | 8914 | 8848 | 3080  | 2869  | 3695  |
| NM_023117    | Cdc25b        | 1.150 | 0.130  | 2106 | 3067 | 3512 | 421   | 201   | 208   |
| NM_024433    | Mtap          | 1.146 | 0.006  | 3394 | 4828 | 3184 | 779   | 1229  | 436   |
| NM_027295    | Rab28         | 1.144 | -0.942 | 4034 | 5059 | 3828 | 1238  | 1463  | 1056  |
| NM_145578    | Ube2m         | 1.142 | 0.826  | 4343 | 4374 | 3363 | 91    | 129   | 18    |
| NM_134054    | 1110002B05Rik | 1.142 | -0.424 | 2724 | 3641 | 2461 | 467   | 325   | 207   |
| NM_198411    | 2610204M08Rik | 1.139 | -1.437 | 2604 | 5678 | 4463 | 2431  | 922   | 276   |
| NM_134094    | Ncald         | 1.136 | -1.241 | 4699 | 8422 | 6002 | 19805 | 25301 | 15252 |
| NM_172694    | Megf9         | 1.135 | -0.768 | 3353 | 7051 | 3698 | 3114  | 1783  | 1829  |
| NM_173764    | Tapt1         | 1.134 | -0.264 | 4199 | 4464 | 2835 | 1195  | 1307  | 643   |
| NM_008994    | Pex2          | 1.133 | -1.367 | 2444 | 4746 | 2920 | 600   | 294   | 223   |
| NM_183171    | Fez1          | 1.131 | -1.493 | 252  | 257  | 255  | 1283  | 716   | 817   |
| NM_007981    | Acsl1         | 1.129 | 0.676  | 3449 | 3220 | 2437 | 2174  | 1835  | 1048  |
| NM_009088    | Polr1a        | 1.127 | 0.688  | 3490 | 5314 | 3216 | 989   | 2126  | 1472  |
| NM_177282    | Mical2        | 1.127 | -0.922 | 1773 | 4286 | 5177 | 6960  | 3045  | 1317  |
| NM_172952    | Gphn          | 1.125 | -0.113 | 6216 | 6377 | 5508 | 9319  | 6978  | 7330  |
| NM_198710    | Sypl          | 1.123 | -0.454 | 2803 | 3848 | 2715 | 727   | 494   | 408   |
| NM_025451    | Camk2n1       | 1.123 | -0.207 | 5361 | 5106 | 2877 | 878   | 278   | 176   |

|              |               |       |        |      |       |      |      |      |      |
|--------------|---------------|-------|--------|------|-------|------|------|------|------|
| NM_009465    | Axl           | 1.122 | -3.781 | 922  | 6201  | 3463 | 1701 | 731  | 495  |
| NM_007708    | Cit           | 1.118 | 0.412  | 5841 | 4033  | 2425 | 3642 | 3578 | 1692 |
| NM_009156    | Sepw1         | 1.116 | 0.096  | 3208 | 5882  | 3193 | 209  | 162  | 48   |
| NM_012055    | Asns          | 1.116 | 0.857  | 4943 | 8380  | 4267 | 279  | 504  | 452  |
| NM_016661    | Ahcy          | 1.113 | -0.216 | 2546 | 2170  | 2211 | 263  | 307  | 318  |
| NM_198420    | D15Wsu169e    | 1.113 | 0.375  | 6685 | 6607  | 6878 | 2821 | 2956 | 2718 |
| NM_144526    | 6720460F02Rik | 1.113 | 0.325  | 2028 | 3149  | 2482 | 481  | 101  | 111  |
| NM_016807    | Sdcbp         | 1.112 | -1.794 | 1620 | 5150  | 3015 | 452  | 458  | 286  |
| NM_011977    | Slc27a1       | 1.109 | -0.228 | 5429 | 2893  | 2249 | 991  | 434  | 690  |
| NM_008380    | Inhba         | 1.107 | -1.851 | 186  | 5931  | 6076 | 1671 | 280  | 580  |
| NM_001025438 | Camk2d        | 1.103 | -0.825 | 5398 | 12397 | 6998 | 6247 | 4727 | 2775 |
| NM_020007    | Mbnl1         | 1.098 | -1.789 | 3367 | 11060 | 5674 | 2560 | 2246 | 1868 |
| NM_146152    | Ipo13         | 1.098 | -0.457 | 4088 | 5789  | 4447 | 562  | 264  | 166  |
| NM_011779    | Coro1c        | 1.095 | 0.916  | 5960 | 5353  | 3571 | 1449 | 1769 | 671  |
| NM_013509    | Eno2          | 1.094 | -1.507 | 2525 | 4606  | 3974 | 939  | 429  | 254  |
| NM_011035    | Pak1          | 1.091 | 0.946  | 423  | 676   | 893  | 1591 | 1106 | 1130 |
| NM_019914    | Mllt11        | 1.084 | -1.474 | 3915 | 7137  | 4377 | 161  | 383  | 84   |
| NM_175937    | Cpeb2         | 1.081 | -0.194 | 5422 | 12203 | 5981 | 1767 | 820  | 733  |
| NM_019471    | Mmp10         | 1.078 | -0.280 | 50   | 32    | 88   | 145  | 156  | 394  |
| NM_019808    | Pdlim5        | 1.073 | 0.264  | 3166 | 6448  | 3869 | 2550 | 2900 | 2339 |
| NM_153563    | 6330569M22Rik | 1.072 | 0.443  | 2929 | 3517  | 3057 | 539  | 509  | 215  |
| NM_134006    | Rdh5          | 1.068 | -0.193 | 180  | 1164  | 539  | 112  | 259  | 181  |
| NM_024495    | Car13         | 1.068 | 0.162  | 709  | 2151  | 1181 | 500  | 491  | 346  |
| NM_026878    | Rasl11b       | 1.067 | 0.813  | 3151 | 3628  | 2037 | 259  | 256  | 178  |
| NM_009506    | Vegfc         | 1.062 | -1.116 | 3106 | 4432  | 2992 | 1535 | 1699 | 1670 |
| NM_010470    | Hp1bp3        | 1.060 | -1.108 | 7243 | 6759  | 4496 | 482  | 689  | 192  |
| NM_011100    | Prkacb        | 1.055 | -0.388 | 4982 | 6151  | 4293 | 1601 | 1742 | 979  |
| NM_030690    | Rai14         | 1.054 | 0.419  | 6431 | 7171  | 5383 | 2802 | 4516 | 4273 |
| NM_029337    | Ep400         | 1.050 | 0.701  | 4674 | 3908  | 3100 | 1616 | 2219 | 1236 |

|              |               |       |        |      |       |      |      |      |      |
|--------------|---------------|-------|--------|------|-------|------|------|------|------|
| NM_008634    | Mtap1b        | 1.049 | -0.333 | 5236 | 9461  | 9789 | 3006 | 2562 | 2296 |
| NM_001045514 | Akna          | 1.049 | 0.458  | 432  | 1201  | 1447 | 1309 | 1140 | 434  |
| NM_053084    | Trim32        | 1.046 | -0.328 | 1559 | 2597  | 1537 | 433  | 210  | 165  |
| NM_175325    | Bbs4          | 1.046 | 0.898  | 1245 | 1736  | 1548 | 589  | 474  | 641  |
| NM_146258    | Stard13       | 1.040 | -3.183 | 1328 | 15412 | 7301 | 5516 | 3060 | 3611 |
| NM_178061    | Mobkl2b       | 1.035 | 0.965  | 5285 | 2731  | 2062 | 7164 | 6983 | 9966 |
| NM_021494    | Dennd5a       | 1.034 | -1.221 | 3209 | 5084  | 2686 | 1336 | 1310 | 711  |
| NM_008624    | Mras          | 1.033 | -0.252 | 2745 | 3978  | 4682 | 3196 | 1031 | 1123 |
| NM_144900    | Atp1a1        | 1.033 | 0.939  | 3974 | 5659  | 3585 | 596  | 792  | 428  |
| NM_008397    | Itga6         | 1.032 | 0.883  | 5221 | 4867  | 3268 | 1649 | 1525 | 6172 |
| NM_028410    | Prkrir        | 1.028 | -0.053 | 3313 | 4510  | 3034 | 277  | 66   | 199  |
| NM_019641    | Stmn1         | 1.023 | 0.704  | 2547 | 4202  | 2263 | 246  | 106  | 94   |
| NM_133927    | Itfg2         | 1.021 | -0.159 | 2193 | 2861  | 1990 | 359  | 546  | 242  |
| NM_028013    | Endod1        | 1.020 | -2.232 | 2444 | 3570  | 3310 | 1684 | 591  | 917  |
| NM_172476    | Tmc7          | 1.019 | 0.890  | 1507 | 2242  | 1591 | 3252 | 1547 | 872  |
| NM_176841    | Ccdc88a       | 1.017 | -0.433 | 4086 | 4857  | 5395 | 3198 | 2871 | 3792 |
| NM_007530    | Bcap29        | 1.016 | -0.216 | 1359 | 2468  | 1106 | 783  | 755  | 719  |
| NM_030706    | Trim2         | 1.012 | 0.759  | 3630 | 2953  | 978  | 2102 | 1205 | 764  |
| NM_011942    | Lypla2        | 1.010 | 0.329  | 3253 | 4142  | 2957 | 107  | 105  | 43   |
| NM_029621    | 2410004L22Rik | 1.010 | 0.536  | 2685 | 2721  | 4044 | 443  | 382  | 349  |
| NM_008487    | Arhgef2       | 1.008 | 0.206  | 4029 | 9133  | 4023 | 879  | 854  | 181  |
| NM_025829    | Eif4e3        | 1.007 | -1.261 | 2005 | 4491  | 3528 | 3891 | 2535 | 1430 |
| NM_008536    | Tm4sf1        | 1.007 | -0.421 | 80   | 9275  | 2064 | 628  | 201  | 197  |
| NM_001039057 | Kcnj15        | 1.007 | -0.914 | 354  | 3077  | 571  | 1594 | 1186 | 1509 |
| NM_153489    | Ubap2l        | 1.004 | 0.932  | 4392 | 5091  | 3894 | 843  | 811  | 519  |
| NM_023290    | Mkrn2         | 1.003 | 0.821  | 2026 | 3074  | 2250 | 387  | 683  | 295  |
| NM_011629    | Nr2c1         | 1.003 | -0.083 | 2361 | 5844  | 4472 | 1799 | 1372 | 1545 |
