# Supplementary material for: Identification of the early and late responder genes during the generation of induced pluripotent stem cells from mouse fibroblasts
Source: PubMed Central journal article supplement (PMC5289558; doi:10.1371/journal.pone.0171300), 2017-02-02
Supplement: pone.0171300.s008.pdf [file pone.0171300.s008.pdf]

**S2 Table. Convergent up genes**

| Gene information |               | mRNA fold change |            | H3K4me3 enrichment |       |       | H3K27me3 enrichment |       |       |
|------------------|---------------|------------------|------------|--------------------|-------|-------|---------------------|-------|-------|
| RefSeq gene      | gene symbol   | iPSCp/sFB-G      | mESC/sFB-G | mESC               | iPSCp | sFB-G | mESC                | iPSCp | sFB-G |
| NM_010686        | Laptm5        | 3.728            | 3.584      | 1062               | 512   | 152   | 901                 | 1293  | 597   |
| NM_010052        | Dlk1          | 3.435            | 1.765      | 928                | 400   | 212   | 1721                | 1077  | 972   |
| NM_008800        | Pde1b         | 3.339            | 1.756      | 1915               | 2764  | 1131  | 2361                | 1893  | 2854  |
| NM_008726        | Nppb          | 3.064            | 2.449      | 465                | 881   | 42    | 65                  | 54    | 29    |
| NM_178701        | Lrrc8d        | 3.037            | 2.912      | 6646               | 6349  | 3439  | 2117                | 2772  | 2126  |
| NM_007681        | Cenpa         | 3.015            | 3.567      | 4379               | 4094  | 1854  | 154                 | 261   | 107   |
| NM_009122        | Satb1         | 2.916            | 1.780      | 5763               | 5778  | 2630  | 6046                | 6793  | 7428  |
| NM_011670        | Uchl1         | 2.845            | 2.740      | 3381               | 1828  | 718   | 342                 | 682   | 1062  |
| NM_008808        | Pdgfa         | 2.768            | 2.480      | 7730               | 10298 | 5285  | 1440                | 417   | 940   |
| NM_134471        | Kif2c         | 2.574            | 2.817      | 3824               | 3248  | 1457  | 446                 | 306   | 126   |
| NM_001042421     | Kntc1         | 2.562            | 2.268      | 2826               | 2815  | 1609  | 1186                | 1557  | 764   |
| NM_023223        | Cdc20         | 2.451            | 3.535      | 3477               | 3436  | 1787  | 67                  | 30    | 37    |
| NM_008905        | Ppfibp2       | 2.439            | 1.207      | 3659               | 4503  | 902   | 3898                | 3992  | 3737  |
| NM_178382        | Flrt3         | 2.423            | 1.322      | 502                | 4106  | 1331  | 763                 | 402   | 1133  |
| NM_001037279     | 2700094K13Rik | 2.417            | 2.347      | 4561               | 3189  | 3414  | 59                  | 32    | 23    |
| NM_019499        | Mad2l1        | 2.400            | 2.293      | 3467               | 5955  | 3206  | 84                  | 96    | 101   |
| NM_013726        | Dbf4          | 2.370            | 3.166      | 5694               | 5016  | 3231  | 426                 | 398   | 328   |
| NM_021788        | Sap30         | 2.355            | 3.677      | 5414               | 5118  | 3716  | 155                 | 154   | 98    |
| NM_026560        | Cdca8         | 2.324            | 3.680      | 5316               | 5084  | 3132  | 293                 | 416   | 171   |
| NM_153118        | Fnbp1l        | 2.322            | 1.717      | 4446               | 4951  | 3488  | 1354                | 1777  | 1095  |
| NM_013538        | Cdca3         | 2.265            | 2.454      | 4875               | 5905  | 3244  | 69                  | 186   | 82    |
| NM_146171        | Ncapd2        | 2.257            | 1.640      | 4936               | 7006  | 4155  | 571                 | 821   | 384   |
| NM_011623        | Top2a         | 2.245            | 2.572      | 4790               | 4673  | 3575  | 722                 | 700   | 858   |
| NM_023061        | Mcam          | 2.240            | 1.206      | 4445               | 3741  | 893   | 844                 | 298   | 685   |
| NM_001033302     | Gm129         | 2.210            | 2.090      | 1924               | 2468  | 1563  | 532                 | 108   | 45    |

|              |               |       |       |      |      |      |      |      |      |
|--------------|---------------|-------|-------|------|------|------|------|------|------|
| NM_023210    | Anp32e        | 2.202 | 1.200 | 4601 | 4682 | 3089 | 312  | 238  | 183  |
| NM_024245    | Kif23         | 2.195 | 1.999 | 3901 | 2993 | 3907 | 380  | 457  | 811  |
| NM_013746    | Plekhb1       | 2.185 | 1.398 | 297  | 214  | 110  | 818  | 253  | 208  |
| NM_009834    | Ccrn4l        | 2.152 | 1.978 | 5292 | 6368 | 3262 | 340  | 440  | 177  |
| NM_001033244 | Fancd2        | 2.131 | 2.883 | 3362 | 5296 | 3268 | 1167 | 1983 | 1512 |
| NM_011121    | Plk1          | 2.120 | 2.550 | 4246 | 4172 | 3050 | 287  | 547  | 183  |
| NM_007598    | Cap1          | 2.089 | 1.469 | 3497 | 5721 | 3099 | 563  | 543  | 384  |
| NM_010931    | Uhrf1         | 2.055 | 2.099 | 5164 | 5861 | 4560 | 506  | 600  | 290  |
| NM_145588    | Kif22         | 2.050 | 2.447 | 4878 | 3468 | 2283 | 326  | 483  | 188  |
| NM_012011    | Eif2s3y       | 2.004 | 2.240 | 476  | 1965 | 111  | 128  | 233  | 176  |
| NM_008142    | Gnb1          | 2.001 | 1.584 | 151  | 221  | 159  | 420  | 648  | 346  |
| NM_027290    | Mcm10         | 2.000 | 3.741 | 2065 | 1228 | 1384 | 524  | 426  | 513  |
| NM_001039556 | E130016E03Rik | 1.995 | 2.967 | 1136 | 1920 | 1256 | 893  | 858  | 727  |
| NM_010937    | Nras          | 1.975 | 2.219 | 1353 | 2981 | 1354 | 126  | 227  | 77   |
| NM_011497    | Aurka         | 1.941 | 2.685 | 6381 | 5560 | 5773 | 271  | 468  | 293  |
| NM_172301    | Ccnb1         | 1.938 | 3.138 | 2807 | 3166 | 2233 | 184  | 195  | 307  |
| NM_010415    | Hbegf         | 1.904 | 1.770 | 3090 | 5358 | 3684 | 558  | 336  | 384  |
| NM_172746    | Hirip3        | 1.895 | 2.630 | 2528 | 3220 | 2188 | 81   | 29   | 46   |
| NM_013928    | Schip1        | 1.888 | 1.654 | 1703 | 2231 | 743  | 1231 | 1167 | 673  |
| NM_007792    | Csrp2         | 1.881 | 2.162 | 2995 | 6150 | 3359 | 558  | 583  | 580  |
| NM_029850    | Bcl7a         | 1.878 | 1.436 | 4825 | 5424 | 3348 | 1105 | 804  | 332  |
| NM_028355    | Tmem48        | 1.877 | 1.632 | 4080 | 3460 | 2203 | 593  | 894  | 457  |
| NM_025520    | Lsm5          | 1.870 | 2.260 | 4164 | 4349 | 2864 | 55   | 123  | 143  |
| NM_134122    | Nrm           | 1.829 | 1.491 | 2393 | 2223 | 1973 | 234  | 181  | 78   |
| NM_016750    | H2afz         | 1.816 | 2.826 | 5420 | 3703 | 2266 | 94   | 54   | 43   |
| NM_008126    | Gjb3          | 1.813 | 4.787 | 2455 | 316  | 128  | 134  | 192  | 120  |
| NM_009689    | Birc5         | 1.812 | 2.647 | 4960 | 4010 | 3872 | 181  | 311  | 155  |
| NM_145409    | Chtf18        | 1.810 | 2.158 | 4048 | 3028 | 4594 | 354  | 321  | 184  |
| NM_001039090 | Skil          | 1.805 | 1.582 | 5004 | 5274 | 3001 | 593  | 486  | 253  |

|              |               |       |       |       |      |      |      |       |       |
|--------------|---------------|-------|-------|-------|------|------|------|-------|-------|
| NM_009015    | Rad54l        | 1.803 | 2.361 | 2663  | 2734 | 1377 | 382  | 387   | 255   |
| NM_009412    | Tpd52         | 1.786 | 2.956 | 8053  | 4165 | 3341 | 1380 | 1980  | 713   |
| NM_001042527 | Blm           | 1.764 | 3.083 | 3829  | 3705 | 2483 | 1122 | 1406  | 993   |
| NM_138744    | Ssx2ip        | 1.755 | 2.080 | 2820  | 2925 | 2011 | 777  | 889   | 570   |
| NM_010220    | Fkbp5         | 1.740 | 2.254 | 5356  | 4841 | 3482 | 1723 | 3039  | 2366  |
| NM_021273    | Ckb           | 1.737 | 1.926 | 6489  | 1542 | 1073 | 659  | 178   | 680   |
| NR_002885    | LOC654467     | 1.735 | 2.598 | 6633  | 5814 | 3780 | 205  | 155   | 105   |
| NM_008564    | Mcm2          | 1.734 | 2.057 | 3935  | 2796 | 2222 | 423  | 457   | 256   |
| NM_011522    | Syngn3        | 1.715 | 1.925 | 2660  | 1216 | 499  | 723  | 1044  | 1548  |
| NM_028039    | Esco2         | 1.712 | 3.283 | 4851  | 2096 | 2524 | 178  | 493   | 367   |
| NM_011638    | Tfrc          | 1.707 | 1.601 | 3192  | 3394 | 3818 | 395  | 495   | 637   |
| NM_028958    | Taf7l         | 1.688 | 2.670 | 353   | 127  | 125  | 1033 | 200   | 318   |
| NM_172714    | Lin54         | 1.683 | 1.133 | 3371  | 4295 | 3029 | 910  | 959   | 591   |
| NM_025411    | 1110049F12Rik | 1.673 | 1.277 | 4412  | 3880 | 2822 | 258  | 250   | 62    |
| NM_026163    | Pkp2          | 1.661 | 2.357 | 3109  | 3203 | 2531 | 1624 | 1426  | 1641  |
| NM_133939    | Lsm8          | 1.651 | 1.568 | 1206  | 3554 | 1973 | 146  | 177   | 106   |
| NM_011132    | Pole          | 1.641 | 1.326 | 3940  | 2879 | 2271 | 865  | 1285  | 674   |
| NM_010615    | Kif11         | 1.638 | 1.894 | 4813  | 5826 | 4799 | 822  | 729   | 1103  |
| NM_181595    | Ppp1r9a       | 1.619 | 1.900 | 4778  | 5128 | 2632 | 6594 | 12897 | 25151 |
| NM_021516    | Mark3         | 1.618 | 1.395 | 5572  | 6380 | 4784 | 1836 | 1696  | 1066  |
| NM_028030    | Rbpms2        | 1.616 | 4.066 | 6572  | 3889 | 3318 | 529  | 584   | 706   |
| NM_028128    | Rfc5          | 1.614 | 2.743 | 3230  | 1570 | 1182 | 305  | 342   | 97    |
| NM_009769    | Klf5          | 1.600 | 6.519 | 6125  | 2170 | 1427 | 427  | 215   | 1253  |
| NM_197959    | 3000004C01Rik | 1.599 | 2.136 | 4838  | 4187 | 3441 | 646  | 397   | 379   |
| NM_145508    | Dyrk3         | 1.594 | 4.227 | 3549  | 2299 | 2711 | 266  | 208   | 424   |
| NM_001014976 | Espl1         | 1.590 | 2.112 | 2407  | 2658 | 2438 | 587  | 965   | 588   |
| NM_028109    | Tpx2          | 1.579 | 1.583 | 2497  | 2788 | 2342 | 717  | 691   | 1051  |
| NM_179203    | Atad3a        | 1.578 | 1.926 | 4008  | 4468 | 3379 | 559  | 414   | 182   |
| NM_010721    | Lmnb1         | 1.565 | 3.869 | 10613 | 6722 | 8357 | 864  | 1131  | 927   |

|              |               |       |       |       |      |      |      |      |      |
|--------------|---------------|-------|-------|-------|------|------|------|------|------|
| NM_025840    | Bzw2          | 1.564 | 2.462 | 5090  | 6826 | 4755 | 929  | 968  | 884  |
| NM_021891    | Fignl1        | 1.561 | 3.027 | 2599  | 2319 | 2532 | 219  | 153  | 298  |
| NM_028002    | Dus4l         | 1.558 | 1.516 | 4779  | 3527 | 2656 | 274  | 338  | 267  |
| NM_172578    | C79407        | 1.550 | 1.958 | 3170  | 2505 | 1662 | 558  | 845  | 493  |
| NM_178185    | Hist1h2ao     | 1.548 | 1.846 | 54    | 50   | 76   | 10   | 10   | 10   |
| NM_011304    | Ruvbl2        | 1.545 | 3.132 | 5294  | 4487 | 3415 | 376  | 322  | 95   |
| NM_008815    | Etv4          | 1.535 | 2.684 | 3522  | 2597 | 2201 | 1348 | 320  | 543  |
| NM_001025192 | Cxadr         | 1.524 | 1.474 | 4068  | 2304 | 2907 | 1423 | 1093 | 1754 |
| NM_172722    | C330023M02Rik | 1.518 | 2.048 | 4442  | 4218 | 2780 | 754  | 789  | 410  |
| NM_028151    | Skiv2l2       | 1.518 | 2.519 | 4426  | 4997 | 4521 | 1046 | 1260 | 1540 |
| NM_172468    | Snx30         | 1.516 | 1.205 | 6608  | 6671 | 4364 | 2220 | 2125 | 1285 |
| NM_019939    | Mpp6          | 1.513 | 1.382 | 2661  | 4433 | 3502 | 1735 | 2742 | 2279 |
| NM_011401    | Slc2a3        | 1.510 | 5.616 | 10130 | 2120 | 782  | 417  | 963  | 753  |
| NM_178183    | Hist1h2ak     | 1.508 | 4.799 | 328   | 759  | 501  | 40   | 42   | 12   |
| NM_009791    | Aspm          | 1.497 | 1.090 | 4479  | 3634 | 3811 | 725  | 608  | 1056 |
| NM_011565    | Tead2         | 1.497 | 1.858 | 1726  | 2392 | 1683 | 503  | 536  | 133  |
| NM_001008421 | Nol10         | 1.491 | 2.693 | 3476  | 4771 | 2585 | 1689 | 2219 | 1378 |
| NM_001077596 | Shroom3       | 1.489 | 1.049 | 5526  | 3626 | 1492 | 2261 | 2080 | 1241 |
| NM_025796    | Mrpl33        | 1.486 | 1.024 | 1853  | 2786 | 1045 | 164  | 253  | 94   |
| NM_027539    | Dclk2         | 1.471 | 2.583 | 6707  | 6210 | 2750 | 3654 | 2462 | 2590 |
| NM_016957    | Hmgn2         | 1.465 | 1.185 | 3769  | 2628 | 2107 | 53   | 101  | 22   |
| NM_011710    | Wars          | 1.454 | 1.467 | 2163  | 3829 | 1777 | 709  | 955  | 375  |
| NM_173400    | 6230416J20Rik | 1.449 | 2.115 | 4242  | 3873 | 2439 | 449  | 503  | 331  |
| NM_022979    | Nup98         | 1.443 | 1.971 | 4210  | 4437 | 3334 | 1032 | 939  | 893  |
| NM_012006    | Acot1         | 1.441 | 3.003 | 949   | 840  | 377  | 686  | 104  | 426  |
| NM_026014    | Cdt1          | 1.432 | 2.697 | 5330  | 3160 | 3856 | 235  | 114  | 70   |
| NM_010066    | Dnmt1         | 1.430 | 1.053 | 4443  | 3351 | 4133 | 961  | 1011 | 1039 |
| NM_198605    | F630043A04Rik | 1.429 | 2.115 | 5497  | 3432 | 3871 | 466  | 789  | 505  |
| NM_016777    | Nasp          | 1.429 | 3.515 | 5329  | 3776 | 2465 | 206  | 549  | 373  |

|              |           |       |       |      |       |      |      |      |      |
|--------------|-----------|-------|-------|------|-------|------|------|------|------|
| NM_139117    | Csda      | 1.416 | 1.980 | 4200 | 6153  | 4463 | 698  | 853  | 682  |
| NM_053074    | Nup62     | 1.411 | 2.377 | 6781 | 8132  | 3380 | 294  | 199  | 135  |
| NM_009125    | Atxn2     | 1.402 | 1.146 | 6288 | 6951  | 4746 | 1726 | 2144 | 1125 |
| NM_028120    | Ccdc123   | 1.401 | 1.158 | 2448 | 2569  | 1927 | 998  | 578  | 374  |
| NM_146154    | Ppp1r8    | 1.397 | 1.919 | 4324 | 4094  | 2956 | 387  | 326  | 157  |
| NM_008252    | Hmgb2     | 1.392 | 4.492 | 3458 | 3220  | 2372 | 101  | 104  | 39   |
| NM_001081212 | Irs2      | 1.387 | 1.654 | 8988 | 18482 | 5099 | 1374 | 775  | 1174 |
| NM_144818    | Ncaph     | 1.385 | 1.630 | 2956 | 2489  | 2750 | 536  | 323  | 389  |
| NM_027460    | Slc25a33  | 1.383 | 1.942 | 2896 | 2920  | 2332 | 778  | 543  | 329  |
| NM_009104    | Rrm2      | 1.382 | 2.002 | 4938 | 4286  | 2839 | 188  | 191  | 95   |
| NM_016692    | Incenp    | 1.378 | 1.850 | 4352 | 4578  | 4360 | 570  | 645  | 568  |
| NM_001045807 | Rbm15     | 1.377 | 1.764 | 8787 | 7008  | 4861 | 210  | 203  | 161  |
| NM_011075    | Abcb1b    | 1.367 | 2.168 | 1942 | 1591  | 1272 | 1919 | 1071 | 770  |
| NM_029094    | Pik3cb    | 1.364 | 2.762 | 4640 | 3372  | 3294 | 1450 | 2011 | 2312 |
| NM_178113    | Ncapd3    | 1.352 | 1.296 | 6768 | 6077  | 6277 | 889  | 1437 | 1344 |
| NM_013733    | Chaf1a    | 1.346 | 1.616 | 2604 | 3508  | 2560 | 455  | 747  | 668  |
| NM_178184    | Hist1h2an | 1.343 | 2.072 | 231  | 428   | 325  | 25   | 16   | 18   |
| NM_177663    | Isg20l2   | 1.341 | 1.722 | 4574 | 4178  | 3108 | 176  | 348  | 131  |
| NM_016690    | Hnrpd1    | 1.341 | 2.377 | 8542 | 9087  | 5297 | 119  | 92   | 44   |
| NM_019693    | Bat1a     | 1.340 | 1.412 | 6710 | 8594  | 8395 | 337  | 332  | 268  |
| NM_172584    | Itpk1     | 1.329 | 2.647 | 6588 | 4131  | 3116 | 3759 | 4053 | 2264 |
| NM_028131    | Cenpn     | 1.329 | 2.492 | 4756 | 2999  | 3672 | 503  | 584  | 581  |
| NM_025866    | Cdca7     | 1.325 | 4.100 | 4971 | 2872  | 3626 | 295  | 246  | 192  |
| NM_145946    | Fanci     | 1.325 | 2.355 | 3810 | 2380  | 2096 | 939  | 1138 | 659  |
| NM_019660    | Mycbp     | 1.322 | 1.850 | 2201 | 2669  | 1996 | 274  | 160  | 116  |
| NM_017397    | Ddx20     | 1.322 | 2.105 | 4397 | 3286  | 2616 | 281  | 72   | 168  |
| NM_001033201 | AU014645  | 1.321 | 1.460 | 5196 | 7469  | 4021 | 663  | 742  | 440  |
| NM_175661    | Hist1h2af | 1.319 | 2.068 | 326  | 739   | 623  | 30   | 10   | 17   |
| NM_145822    | Cd3eap    | 1.318 | 1.651 | 2950 | 2890  | 2078 | 113  | 86   | 30   |

|              |               |       |       |      |       |      |      |      |       |
|--------------|---------------|-------|-------|------|-------|------|------|------|-------|
| NM_025814    | Serbp1        | 1.314 | 1.690 | 8560 | 12182 | 7941 | 473  | 665  | 495   |
| NM_021714    | Wbp11         | 1.312 | 1.401 | 4443 | 5071  | 3880 | 215  | 459  | 289   |
| NM_011119    | Pa2g4         | 1.310 | 1.924 | 7972 | 6536  | 5858 | 229  | 383  | 225   |
| NM_021512    | Nup160        | 1.309 | 1.255 | 5144 | 4187  | 4077 | 823  | 930  | 1147  |
| NM_175265    | 6720463M24Rik | 1.307 | 2.143 | 4696 | 4002  | 4519 | 568  | 506  | 590   |
| NM_148917    | Pabpc4        | 1.305 | 2.558 | 1558 | 2180  | 1920 | 243  | 354  | 191   |
| NM_207238    | Fbxo27        | 1.302 | 2.966 | 3196 | 775   | 241  | 132  | 719  | 719   |
| NM_010219    | Fkbp4         | 1.300 | 1.849 | 6927 | 7084  | 6029 | 268  | 402  | 156   |
| NM_026993    | Ddah1         | 1.287 | 1.204 | 2927 | 3615  | 2596 | 4742 | 3466 | 1610  |
| NM_023536    | Mrto4         | 1.280 | 2.574 | 5771 | 5187  | 3352 | 146  | 131  | 84    |
| NM_010414    | Htt           | 1.279 | 1.107 | 5058 | 6149  | 3767 | 2264 | 3135 | 1626  |
| NM_009773    | Bub1b         | 1.278 | 2.798 | 2410 | 3306  | 3110 | 824  | 712  | 881   |
| NM_016926    | Sart3         | 1.276 | 1.324 | 4708 | 4128  | 2905 | 471  | 820  | 283   |
| NM_027494    | Zcchc8        | 1.270 | 1.165 | 3981 | 4537  | 3208 | 494  | 471  | 275   |
| NM_013807    | Plk3          | 1.269 | 3.416 | 5701 | 4191  | 2887 | 228  | 168  | 81    |
| NM_010790    | Melk          | 1.269 | 1.901 | 2823 | 2407  | 1616 | 992  | 1018 | 616   |
| NM_170779    | Wwc1          | 1.268 | 2.473 | 6472 | 3050  | 2709 | 4885 | 6362 | 10372 |
| NM_010353    | Gsg2          | 1.265 | 2.002 | 4207 | 4517  | 3967 | 183  | 68   | 95    |
| NM_001039129 | Hnrpa1        | 1.265 | 3.097 | 6643 | 5854  | 3789 | 206  | 163  | 120   |
| NM_029797    | Mnd1          | 1.264 | 2.943 | 1096 | 1178  | 1251 | 1237 | 1331 | 901   |
| NM_016682    | Uba2          | 1.257 | 1.576 | 4788 | 3398  | 2768 | 513  | 622  | 234   |
| NM_026352    | Ppid          | 1.256 | 1.735 | 3926 | 4815  | 2683 | 223  | 177  | 342   |
| NM_011131    | Pold1         | 1.255 | 2.763 | 2451 | 1676  | 1712 | 660  | 452  | 202   |
| NM_176933    | Dusp4         | 1.255 | 1.280 | 9722 | 14104 | 8879 | 1179 | 186  | 113   |
| NM_153396    | Mical3        | 1.255 | 2.212 | 1077 | 1295  | 770  | 2191 | 2921 | 1471  |
| NM_011258    | Rfc1          | 1.254 | 1.817 | 3021 | 3642  | 2463 | 1241 | 1229 | 652   |
| NM_029157    | Sf3a3         | 1.245 | 1.514 | 3416 | 2622  | 2357 | 273  | 482  | 152   |
| NM_023525    | Cad           | 1.228 | 1.909 | 4381 | 3879  | 2549 | 552  | 664  | 303   |
| NM_008949    | Psmc3ip       | 1.227 | 2.836 | 3102 | 1617  | 2123 | 75   | 81   | 100   |

|              |               |       |       |      |      |      |      |      |      |
|--------------|---------------|-------|-------|------|------|------|------|------|------|
| NM_027148    | Exosc8        | 1.226 | 1.152 | 6726 | 5948 | 5072 | 155  | 149  | 77   |
| NM_026849    | Mtmr14        | 1.219 | 1.366 | 2463 | 4498 | 3338 | 917  | 1474 | 941  |
| NM_025642    | 2610039C10Rik | 1.217 | 1.242 | 3009 | 2601 | 3889 | 222  | 406  | 242  |
| NM_027427    | Taf15         | 1.215 | 2.923 | 4900 | 6001 | 4241 | 671  | 594  | 979  |
| NM_175175    | Plekhf2       | 1.205 | 4.863 | 7314 | 4200 | 2970 | 262  | 555  | 285  |
| NM_009261    | Strbp         | 1.204 | 2.765 | 172  | 274  | 388  | 1274 | 1510 | 3214 |
| NM_023203    | 2410015N17Rik | 1.196 | 2.984 | 2647 | 1145 | 1036 | 89   | 70   | 45   |
| NM_025626    | 3110001A13Rik | 1.196 | 1.357 | 3693 | 4470 | 3717 | 2986 | 1079 | 1741 |
| NM_018868    | Nol5          | 1.194 | 1.639 | 5328 | 3989 | 3115 | 488  | 479  | 766  |
| NM_172697    | Prpf38a       | 1.193 | 1.330 | 5419 | 3745 | 2589 | 231  | 210  | 182  |
| NM_021895    | Actn4         | 1.190 | 1.868 | 7375 | 6366 | 4351 | 1534 | 1558 | 705  |
| NM_009097    | Rps6ka1       | 1.186 | 3.406 | 4641 | 2907 | 2236 | 970  | 1234 | 493  |
| NM_199196    | Suz12         | 1.185 | 2.879 | 5626 | 4622 | 4833 | 747  | 762  | 1084 |
| NM_001013026 | Ttf2          | 1.184 | 1.920 | 2530 | 1831 | 1634 | 472  | 735  | 284  |
| NM_013827    | Mtf2          | 1.177 | 3.192 | 4631 | 2741 | 2027 | 528  | 940  | 601  |
| NM_016699    | Exosc10       | 1.176 | 1.377 | 2632 | 2929 | 1695 | 589  | 472  | 312  |
| NM_019830    | Hrmt1l2       | 1.174 | 2.332 | 5181 | 3991 | 3088 | 214  | 301  | 89   |
| NM_020587    | Sfrs4         | 1.173 | 1.355 | 5847 | 4654 | 3347 | 625  | 455  | 285  |
| NM_019748    | Sae1          | 1.173 | 1.286 | 3949 | 2823 | 2482 | 888  | 1171 | 613  |
| NM_008566    | Mcm5          | 1.170 | 2.901 | 6501 | 2524 | 3995 | 336  | 354  | 365  |
| NM_009056    | Rfx2          | 1.165 | 4.068 | 2734 | 1987 | 1590 | 1478 | 3584 | 3292 |
| NM_145964    | BC002199      | 1.162 | 1.014 | 2673 | 3216 | 2151 | 439  | 574  | 278  |
| NM_026231    | Gstcd         | 1.162 | 1.440 | 4849 | 5825 | 3794 | 1397 | 1519 | 1145 |
| NM_001080979 | Tead4         | 1.162 | 1.129 | 5445 | 7823 | 6166 | 2766 | 2113 | 1273 |
| NM_011239    | Ranbp1        | 1.157 | 2.032 | 7416 | 6061 | 8373 | 201  | 333  | 211  |
| NM_133878    | Rcc1          | 1.148 | 1.564 | 3958 | 2960 | 2593 | 230  | 235  | 161  |
| NM_145923    | Rell1         | 1.146 | 1.586 | 4116 | 4011 | 2890 | 1254 | 1376 | 776  |
| NM_144805    | Tmem40        | 1.142 | 2.594 | 4162 | 525  | 369  | 908  | 1506 | 1288 |
| NM_030597    | Lsm2          | 1.137 | 2.512 | 4596 | 4692 | 3758 | 78   | 104  | 122  |

|              |               |       |       |      |       |       |      |      |      |
|--------------|---------------|-------|-------|------|-------|-------|------|------|------|
| NM_023215    | 2500003M10Rik | 1.137 | 1.577 | 3260 | 3894  | 2135  | 138  | 229  | 122  |
| NM_026714    | 0610037D15Rik | 1.135 | 1.095 | 1162 | 1800  | 995   | 88   | 30   | 42   |
| NM_145393    | Ythdf2        | 1.135 | 1.470 | 4146 | 5048  | 3426  | 313  | 558  | 265  |
| NM_178683    | Depdc1b       | 1.126 | 1.894 | 5078 | 2801  | 4074  | 1511 | 1642 | 1800 |
| NM_013604    | Mtx1          | 1.123 | 2.600 | 4354 | 3611  | 2621  | 189  | 144  | 80   |
| NM_021284    | Kras          | 1.119 | 1.204 | 5463 | 6589  | 5143  | 640  | 982  | 789  |
| NM_025639    | Cenpm         | 1.115 | 2.694 | 3431 | 2800  | 2722  | 272  | 227  | 233  |
| NM_172681    | D930015E06Rik | 1.109 | 1.298 | 6184 | 4860  | 4093  | 3524 | 2500 | 1854 |
| NM_053202    | Foxp1         | 1.106 | 1.032 | 6119 | 15009 | 11044 | 8537 | 7275 | 5560 |
| NM_025654    | Rdm1          | 1.104 | 3.932 | 1160 | 915   | 374   | 242  | 240  | 239  |
| NM_001025365 | D4Wsu114e     | 1.104 | 1.685 | 3784 | 4559  | 2647  | 214  | 304  | 140  |
| NM_026079    | Ikbkap        | 1.104 | 1.154 | 6700 | 5474  | 3856  | 935  | 818  | 680  |
| NM_027901    | Gtf3c2        | 1.102 | 1.088 | 5630 | 4725  | 3552  | 448  | 684  | 215  |
| NM_153566    | Yrdc          | 1.092 | 1.818 | 6219 | 5263  | 4547  | 121  | 121  | 57   |
| NM_009765    | Brca2         | 1.092 | 1.466 | 2684 | 2501  | 2191  | 629  | 831  | 1203 |
| NM_144553    | Dlgap5        | 1.090 | 1.947 | 1673 | 2521  | 1903  | 681  | 427  | 741  |
| NR_002898    | Snora65       | 1.089 | 2.943 | 3776 | 2334  | 2616  | 23   | 26   | 43   |
| NM_177150    | Cenpt         | 1.087 | 2.106 | 3590 | 2091  | 2758  | 246  | 196  | 110  |
| NM_009477    | Upp1          | 1.085 | 5.483 | 5345 | 1817  | 1445  | 679  | 509  | 1444 |
| NM_013896    | Timm9         | 1.085 | 1.043 | 3031 | 3610  | 2403  | 202  | 282  | 306  |
| NM_172665    | Pdk1          | 1.077 | 2.778 | 3685 | 2817  | 2749  | 581  | 404  | 1767 |
| NM_030116    | Mrpl9         | 1.072 | 1.482 | 3951 | 4096  | 3032  | 80   | 132  | 78   |
| NM_133756    | Gpn1          | 1.071 | 2.919 | 2748 | 2350  | 1500  | 401  | 319  | 168  |
| NM_019800    | Acp6          | 1.070 | 2.126 | 4356 | 3362  | 2706  | 358  | 380  | 289  |
| NM_148948    | Dicer1        | 1.069 | 2.371 | 3541 | 3938  | 3358  | 1616 | 1454 | 981  |
| NM_145958    | Kbtbd2        | 1.064 | 1.215 | 3733 | 9380  | 5919  | 360  | 627  | 522  |
| NM_011241    | Rangap1       | 1.064 | 1.789 | 6405 | 5428  | 5032  | 530  | 598  | 753  |
| NM_026374    | Ilf2          | 1.064 | 1.350 | 2791 | 2496  | 1754  | 135  | 108  | 137  |
| NM_199447    | Rrp12         | 1.063 | 2.232 | 3676 | 3204  | 3743  | 940  | 608  | 558  |



|              |               |       |       |       |      |      |      |      |      |
|--------------|---------------|-------|-------|-------|------|------|------|------|------|
| NM_001042620 | Dhx15         | 1.061 | 1.733 | 3625  | 6411 | 3490 | 526  | 643  | 610  |
| NM_026872    | Ubap2         | 1.060 | 1.477 | 5457  | 3878 | 3104 | 1226 | 1604 | 1047 |
| NM_133740    | Prmt3         | 1.059 | 1.158 | 1867  | 1954 | 1311 | 1235 | 1596 | 1288 |
| NM_017374    | Ppp2cb        | 1.056 | 1.582 | 3287  | 3057 | 2165 | 369  | 238  | 195  |
| NM_001081392 | Mdn1          | 1.052 | 2.463 | 3364  | 4030 | 2395 | 1793 | 2267 | 1701 |
| NM_033526    | Ubqln4        | 1.050 | 2.191 | 7895  | 3811 | 3162 | 371  | 409  | 117  |
| NM_175224    | Metap1        | 1.047 | 1.019 | 2798  | 4231 | 2468 | 449  | 740  | 324  |
| NM_019671    | Net1          | 1.047 | 1.122 | 3844  | 5501 | 4709 | 906  | 770  | 911  |
| NM_011959    | Orc5l         | 1.044 | 1.390 | 4214  | 4086 | 2157 | 709  | 917  | 1007 |
| NM_025729    | Map3k7ip3     | 1.043 | 1.382 | 1859  | 2176 | 2531 | 420  | 709  | 736  |
| NM_001080127 | Rnps1         | 1.042 | 1.255 | 6860  | 8115 | 6190 | 212  | 446  | 307  |
| NM_199467    | F730047E07Rik | 1.039 | 1.369 | 361   | 493  | 469  | 1244 | 1841 | 1436 |
| NM_028244    | Rrp1b         | 1.038 | 3.222 | 5712  | 4774 | 5128 | 835  | 985  | 555  |
| NM_001004364 | Ddef2         | 1.036 | 1.421 | 3703  | 2695 | 2285 | 4438 | 3763 | 2146 |
| NM_029508    | Pcgf5         | 1.033 | 2.210 | 2077  | 2566 | 2415 | 2474 | 2437 | 2933 |
| NM_011358    | Sfrs2         | 1.032 | 1.578 | 11591 | 8889 | 9211 | 214  | 175  | 61   |
| NM_026309    | Lsm3          | 1.031 | 1.350 | 4940  | 4487 | 4179 | 246  | 370  | 192  |
| NM_207205    | Igsf3         | 1.026 | 2.385 | 3353  | 4411 | 2164 | 2546 | 2086 | 1027 |
| NM_133872    | Aof2          | 1.025 | 1.643 | 3311  | 4548 | 2890 | 743  | 1130 | 884  |
| NM_199009    | Fam160a2      | 1.023 | 1.739 | 3599  | 1920 | 2620 | 339  | 415  | 208  |
| NR_001592    | H19           | 1.023 | 2.525 | 104   | 35   | 60   | 492  | 226  | 729  |
| NM_139061    | Vps54         | 1.022 | 1.332 | 4882  | 4450 | 4678 | 1753 | 1966 | 2100 |
| NM_057172    | Fubp1         | 1.021 | 1.845 | 8173  | 9872 | 5149 | 381  | 323  | 273  |
| NM_010715    | Lig1          | 1.012 | 2.484 | 2226  | 1642 | 1652 | 527  | 705  | 417  |
| NM_009951    | Igf2bp1       | 1.010 | 5.464 | 13046 | 2828 | 1122 | 1279 | 5483 | 6832 |
| NM_173189    | Mcph1         | 1.008 | 1.434 | 5474  | 4843 | 6764 | 4475 | 4175 | 2920 |
| NM_145552    | Gnl2          | 1.008 | 1.517 | 3872  | 4079 | 2234 | 522  | 631  | 346  |
