# Supplementary material for: Identification of the early and late responder genes during the generation of induced pluripotent stem cells from mouse fibroblasts
Source: PubMed Central journal article supplement (PMC5289558; doi:10.1371/journal.pone.0171300), 2017-02-02
Supplement: pone.0171300.s009.pdf [file pone.0171300.s009.pdf]

**S3 Table. Resistant up genes**

| Gene information |               | mRNA fold change |            | H3K4me3 enrichment |       |       | H3K27me3 enrichment |       |       |
|------------------|---------------|------------------|------------|--------------------|-------|-------|---------------------|-------|-------|
| RefSeq gene      | gene symbol   | iPSCp/sFB-G      | mESC/sFB-G | mESC               | iPSCp | sFB-G | mESC                | iPSCp | sFB-G |
| NM_025274        | Dppa5         | -0.288           | 8.542      | 422                | 10    | 11    | 10                  | 55    | 27    |
| NM_011934        | Esrrb         | -0.330           | 7.226      | 18927              | 1666  | 1943  | 11018               | 13562 | 6321  |
| NM_212457        | Bex4          | 0.625            | 6.867      | 325                | 14    | 36    | 10                  | 85    | 163   |
| NM_026480        | 2410146L05Rik | -0.114           | 6.789      | 1161               | 21    | 164   | 48                  | 230   | 639   |
| NM_013633        | Pou5f1        | 0.093            | 6.689      | 9556               | 49    | 95    | 199                 | 784   | 330   |
| NM_001081202     | L1td1         | 0.217            | 6.418      | 7853               | 95    | 64    | 163                 | 719   | 379   |
| NM_026323        | Wfdc2         | -0.040           | 6.388      | 776                | 179   | 517   | 303                 | 937   | 1450  |
| NM_028602        | Tex19.1       | -0.006           | 6.344      | 1392               | 37    | 47    | 229                 | 141   | 75    |
| NM_015798        | Fbxo15        | -0.345           | 6.100      | 6258               | 3897  | 3605  | 734                 | 1826  | 2501  |
| NM_009434        | Phlda2        | 0.090            | 6.026      | 1938               | 166   | 398   | 429                 | 186   | 540   |
| NM_139218        | Dppa3         | -0.022           | 5.918      | 1805               | 233   | 105   | 217                 | 345   | 145   |
| NM_009903        | Cldn4         | -0.193           | 5.901      | 9656               | 65    | 77    | 123                 | 200   | 159   |
| NM_016754        | Mylpf         | 0.412            | 5.876      | 1053               | 75    | 201   | 45                  | 109   | 29    |
| NM_001005423     | Mreg          | 0.840            | 5.843      | 5963               | 1972  | 1934  | 1215                | 1970  | 4531  |
| NM_011107        | Pla2g1b       | 0.125            | 5.837      | 381                | 10    | 103   | 237                 | 338   | 107   |
| NM_010174        | Fabp3         | -0.540           | 5.820      | 6445               | 544   | 978   | 153                 | 876   | 554   |
| NM_175503        | Aard          | 0.095            | 5.774      | 2348               | 54    | 120   | 445                 | 403   | 481   |
| NM_009335        | Tcfap2c       | -0.093           | 5.706      | 8729               | 31    | 307   | 1320                | 607   | 3290  |
| NM_144953        | 1700019D03Rik | 0.034            | 5.552      | 4120               | 538   | 667   | 470                 | 1082  | 2238  |
| NM_175303        | Sall4         | 0.103            | 5.524      | 9282               | 108   | 444   | 308                 | 1503  | 3910  |
| NM_009426        | Trh           | -0.165           | 5.417      | 964                | 32    | 65    | 574                 | 1140  | 1077  |
| NM_022409        | Zfp296        | -0.123           | 5.300      | 4641               | 406   | 669   | 97                  | 75    | 106   |
| NM_023894        | Rhox9         | 0.010            | 5.096      | 62                 | 10    | 20    | 10                  | 10    | 10    |
| NM_018815        | Nup210        | 0.954            | 5.004      | 4143               | 2732  | 1799  | 2894                | 19779 | 8416  |
| NM_016968        | Olig1         | 0.317            | 4.979      | 6065               | 179   | 170   | 253                 | 1104  | 1566  |

|              |               |        |       |       |      |      |      |       |       |
|--------------|---------------|--------|-------|-------|------|------|------|-------|-------|
| NM_008342    | Igfbp2        | -0.209 | 4.976 | 4122  | 479  | 689  | 1102 | 3871  | 3379  |
| NM_009482    | Utf1          | -0.107 | 4.914 | 6972  | 31   | 239  | 182  | 565   | 1069  |
| NM_008698    | Nipsnap1      | 0.246  | 4.834 | 2836  | 600  | 911  | 710  | 1731  | 1855  |
| NM_145438    | Llgl2         | -0.920 | 4.797 | 4916  | 985  | 3220 | 1589 | 2655  | 995   |
| NM_175332    | E130012A19Rik | 0.121  | 4.694 | 5889  | 517  | 1491 | 301  | 729   | 1709  |
| NM_010346    | Grb7          | -0.114 | 4.579 | 1034  | 109  | 142  | 575  | 1936  | 1672  |
| NM_018777    | Cldn6         | -0.093 | 4.540 | 1303  | 148  | 78   | 634  | 851   | 1314  |
| NM_009575    | Zic3          | 0.055  | 4.513 | 7267  | 471  | 230  | 127  | 630   | 1704  |
| NM_027941    | Lrrc34        | 0.168  | 4.398 | 856   | 92   | 109  | 424  | 606   | 557   |
| NM_013721    | Rpl7a         | 0.110  | 4.395 | 8648  | 5784 | 6540 | 71   | 91    | 49    |
| NM_013873    | Sult4a1       | -0.374 | 4.363 | 3431  | 337  | 622  | 1656 | 1976  | 2812  |
| NM_011987    | Pla2g10       | -0.057 | 4.340 | 448   | 60   | 126  | 319  | 1115  | 937   |
| NM_212483    | Krt42         | 0.007  | 4.318 | 286   | 147  | 118  | 677  | 448   | 392   |
| NM_008652    | Mybl2         | 0.356  | 4.209 | 15311 | 1946 | 2416 | 654  | 451   | 423   |
| NM_019448    | Dnmt3l        | -1.428 | 4.189 | 3018  | 171  | 693  | 322  | 1145  | 503   |
| NM_175329    | Chchd10       | -2.545 | 4.188 | 4062  | 57   | 511  | 146  | 148   | 80    |
| NM_198412    | Dnajc6        | 0.192  | 4.126 | 1022  | 767  | 485  | 2290 | 3702  | 3435  |
| NM_021480    | Tdh           | -0.010 | 4.106 | 6449  | 184  | 184  | 461  | 1986  | 2662  |
| NM_133982    | Rpp25         | -0.598 | 4.082 | 3673  | 361  | 692  | 126  | 517   | 723   |
| NM_013914    | Snai3         | -0.106 | 4.081 | 1494  | 41   | 197  | 374  | 944   | 1247  |
| NM_029821    | 1190003J15Rik | 0.075  | 4.045 | 985   | 10   | 28   | 168  | 164   | 51    |
| NM_001033425 | Zscan10       | -0.188 | 3.994 | 3748  | 263  | 218  | 313  | 1675  | 587   |
| NM_025285    | Stmn2         | 0.919  | 3.961 | 2621  | 488  | 614  | 1141 | 1941  | 1473  |
| NM_011443    | Sox2          | 0.803  | 3.956 | 10885 | 5892 | 122  | 170  | 386   | 1172  |
| NM_011861    | Pacsin1       | 0.002  | 3.939 | 3367  | 1003 | 1324 | 3865 | 10630 | 5409  |
| NM_153577    | AI428936      | 0.126  | 3.928 | 1389  | 51   | 33   | 91   | 121   | 46    |
| NM_011618    | Tnnt1         | 0.124  | 3.927 | 271   | 80   | 57   | 441  | 698   | 161   |
| NM_181548    | Eras          | 0.043  | 3.920 | 1787  | 45   | 11   | 189  | 325   | 518   |
| NM_016697    | Gpc3          | -0.240 | 3.910 | 2809  | 1564 | 1679 | 5439 | 7599  | 11767 |

|           |         |        |       |       |      |      |      |       |       |
|-----------|---------|--------|-------|-------|------|------|------|-------|-------|
| NM_080575 | Acss1   | 0.732  | 3.841 | 2971  | 803  | 1538 | 2124 | 2023  | 2545  |
| NM_178922 | Hic2    | 0.154  | 3.708 | 7473  | 4188 | 4928 | 582  | 945   | 668   |
| NM_009328 | Tcf15   | -0.002 | 3.706 | 3481  | 39   | 413  | 891  | 707   | 2239  |
| NM_021391 | Ppp1r1a | 0.145  | 3.683 | 2996  | 294  | 596  | 600  | 1905  | 1819  |
| NM_026631 | Nola2   | 0.202  | 3.681 | 4593  | 3099 | 3069 | 91   | 100   | 115   |
| NM_144841 | Otx2    | -0.104 | 3.667 | 1940  | 100  | 62   | 1703 | 1308  | 1942  |
| NM_009556 | Zfp42   | 0.212  | 3.632 | 2478  | 83   | 30   | 116  | 282   | 175   |
| NM_010202 | Fgf4    | 0.045  | 3.612 | 10109 | 49   | 53   | 115  | 2050  | 1512  |
| NM_015782 | Snrpa   | 0.365  | 3.592 | 3867  | 3563 | 2280 | 183  | 288   | 89    |
| NM_028060 | Slc35f2 | 0.085  | 3.585 | 4551  | 167  | 773  | 875  | 2149  | 1939  |
| NM_011677 | Ung     | 0.297  | 3.574 | 5314  | 2111 | 1740 | 286  | 165   | 89    |
| NM_178254 | Tcf5    | -0.236 | 3.552 | 3848  | 110  | 239  | 696  | 1367  | 2549  |
| NM_177776 | Smtnl2  | -0.003 | 3.537 | 4602  | 521  | 1166 | 1533 | 2857  | 3666  |
| NM_172670 | Gyltl1b | 0.006  | 3.537 | 2449  | 14   | 225  | 256  | 470   | 315   |
| NM_009337 | Tcl1    | 0.055  | 3.530 | 1105  | 77   | 22   | 307  | 249   | 136   |
| NM_028913 | Zfp819  | -0.158 | 3.512 | 2263  | 17   | 188  | 222  | 800   | 361   |
| NM_030677 | Gpx2    | 0.126  | 3.490 | 180   | 32   | 23   | 242  | 310   | 122   |
| NM_010357 | Gsta4   | -0.319 | 3.487 | 1346  | 308  | 507  | 233  | 644   | 637   |
| NM_027366 | Ly6g6e  | -0.053 | 3.472 | 710   | 148  | 223  | 149  | 488   | 354   |
| NM_013659 | Sema4b  | 0.777  | 3.437 | 9975  | 5398 | 4280 | 878  | 997   | 614   |
| NM_153547 | Gnl3    | -0.158 | 3.422 | 4939  | 5150 | 4394 | 89   | 155   | 173   |
| NM_008635 | Mtap7   | -0.003 | 3.397 | 5975  | 1947 | 2597 | 4037 | 10082 | 10593 |
| NM_145222 | B3gnt7  | 0.186  | 3.344 | 6319  | 79   | 527  | 175  | 1090  | 1384  |
| NM_176834 | Rnf208  | 0.009  | 3.340 | 1217  | 19   | 262  | 212  | 290   | 847   |
| NM_013474 | Apoa2   | -0.052 | 3.320 | 10    | 11   | 20   | 122  | 73    | 48    |
| NM_144819 | Ccdc92  | 0.934  | 3.317 | 5359  | 3445 | 3050 | 633  | 1911  | 1607  |
| NM_008955 | Rhox6   | -0.115 | 3.316 | 121   | 31   | 17   | 195  | 85    | 20    |
| NM_009864 | Cdh1    | -0.093 | 3.308 | 8166  | 723  | 1471 | 1441 | 4222  | 7319  |
| NM_009944 | Cox7a1  | 0.802  | 3.299 | 144   | 233  | 112  | 106  | 94    | 55    |

|              |          |        |       |       |      |      |      |       |      |
|--------------|----------|--------|-------|-------|------|------|------|-------|------|
| NM_009749    | Bex2     | 0.585  | 3.266 | 401   | 237  | 149  | 47   | 75    | 179  |
| NM_028715    | Fcho1    | -0.062 | 3.250 | 1691  | 98   | 453  | 1634 | 1364  | 1765 |
| NM_013611    | Nodal    | 0.048  | 3.247 | 7291  | 88   | 256  | 149  | 1951  | 1932 |
| NM_011300    | Rps7     | 0.369  | 3.246 | 6115  | 4775 | 2544 | 121  | 173   | 91   |
| NM_016889    | Insm1    | 0.134  | 3.245 | 5253  | 352  | 628  | 1447 | 1518  | 2434 |
| NM_022004    | Fxyd6    | -2.319 | 3.245 | 1343  | 196  | 835  | 1514 | 1478  | 1575 |
| NM_001033865 | Rps27a   | 0.506  | 3.241 | 5729  | 4924 | 4250 | 110  | 58    | 31   |
| NM_016689    | Aqp3     | 0.008  | 3.223 | 2086  | 124  | 185  | 999  | 721   | 469  |
| NM_011600    | Tle4     | 0.900  | 3.218 | 6266  | 4845 | 3686 | 2786 | 4588  | 5091 |
| NM_008506    | Mycl1    | 0.795  | 3.206 | 4278  | 1627 | 1372 | 727  | 801   | 746  |
| NM_019547    | Rbm38    | 0.669  | 3.179 | 4310  | 2527 | 2527 | 512  | 410   | 353  |
| NM_010071    | Dok2     | 0.201  | 3.168 | 797   | 32   | 54   | 548  | 163   | 201  |
| NM_007905    | Phc1     | 0.397  | 3.148 | 2775  | 346  | 165  | 386  | 437   | 456  |
| NM_008452    | Klf2     | -0.750 | 3.143 | 12638 | 2797 | 4893 | 133  | 240   | 33   |
| NM_010311    | Gnaz     | 0.237  | 3.134 | 3214  | 1131 | 1751 | 3795 | 4028  | 3221 |
| NM_010663    | Krt17    | -0.035 | 3.115 | 307   | 72   | 83   | 478  | 232   | 283  |
| NM_009171    | Shmt1    | 0.696  | 3.109 | 2345  | 1492 | 904  | 648  | 610   | 614  |
| NM_009528    | Wnt7b    | 0.057  | 3.103 | 6906  | 991  | 1481 | 8738 | 9093  | 6355 |
| NM_023137    | Ubd      | 0.109  | 3.101 | 157   | 86   | 12   | 84   | 90    | 259  |
| NM_008860    | Prkcz    | -0.335 | 3.050 | 5765  | 1577 | 1998 | 3749 | 11787 | 4213 |
| NM_031386    | Tex14    | -0.039 | 3.041 | 3875  | 2646 | 2125 | 3857 | 8055  | 5981 |
| NM_019689    | Arid3b   | 0.027  | 3.040 | 733   | 242  | 463  | 1150 | 1662  | 1950 |
| NM_146177    | Suv420h2 | 0.209  | 3.032 | 1924  | 2430 | 1897 | 221  | 340   | 83   |
| NM_026115    | Hat1     | 0.993  | 3.007 | 4228  | 2011 | 3235 | 924  | 852   | 1119 |
| NM_033608    | Igsf9    | 0.587  | 3.001 | 1268  | 606  | 848  | 1216 | 1081  | 1650 |
| NM_007431    | Akp2     | -0.081 | 2.995 | 3536  | 588  | 452  | 1533 | 6727  | 1946 |
| NM_010900    | Nfatc2ip | 0.585  | 2.963 | 4571  | 2502 | 2344 | 240  | 275   | 135  |
| NM_031170    | Krt8     | 0.014  | 2.962 | 405   | 135  | 155  | 890  | 1325  | 783  |
| NM_011328    | Sct      | -0.126 | 2.958 | 888   | 32   | 146  | 198  | 476   | 157  |

|              |               |        |       |       |       |      |      |      |      |
|--------------|---------------|--------|-------|-------|-------|------|------|------|------|
| NM_010264    | Nr6a1         | 0.135  | 2.957 | 5368  | 7966  | 8578 | 4974 | 3737 | 4889 |
| NM_025554    | Polr2e        | 0.199  | 2.956 | 3536  | 3539  | 3176 | 167  | 239  | 104  |
| NM_153404    | Liph          | 0.253  | 2.939 | 836   | 599   | 755  | 971  | 1485 | 1056 |
| NM_019535    | Sh3gl2        | 0.051  | 2.921 | 7453  | 1197  | 1342 | 4808 | 7260 | 6801 |
| NM_001080969 | Thg1l         | 0.329  | 2.918 | 1636  | 829   | 1282 | 252  | 126  | 330  |
| NM_177742    | Triml1        | 0.198  | 2.913 | 55    | 66    | 39   | 93   | 160  | 184  |
| NM_028083    | Chaf1b        | 0.986  | 2.909 | 3525  | 1811  | 3302 | 427  | 715  | 260  |
| NM_009446    | Tuba3a        | 0.052  | 2.902 | 119   | 66    | 90   | 769  | 926  | 215  |
| NM_011289    | Rpl27         | -0.036 | 2.899 | 6319  | 4126  | 3378 | 153  | 38   | 67   |
| NM_146257    | Slc29a4       | -0.235 | 2.893 | 3266  | 187   | 651  | 1624 | 2275 | 1970 |
| NM_145464    | Sox21         | 0.025  | 2.887 | 6830  | 288   | 658  | 1167 | 358  | 1641 |
| NM_172963    | 1110012J17Rik | 0.669  | 2.874 | 11636 | 4846  | 5849 | 3561 | 6206 | 4500 |
| NR_003634    | Rps4y2        | -2.835 | 2.872 | 4059  | 235   | 1048 | 65   | 36   | 62   |
| NM_016964    | Stag3         | -0.294 | 2.862 | 984   | 612   | 1070 | 1199 | 1873 | 1537 |
| NM_029186    | Tmem180       | 0.020  | 2.861 | 1505  | 330   | 1002 | 552  | 777  | 427  |
| NM_020002    | Rec8          | -0.137 | 2.849 | 214   | 64    | 85   | 350  | 423  | 353  |
| NM_177261    | Kndc1         | 0.183  | 2.842 | 2264  | 518   | 460  | 3734 | 4252 | 3988 |
| NM_144811    | Cbx7          | -0.069 | 2.820 | 4322  | 2121  | 2042 | 411  | 583  | 776  |
| NM_021501    | Pias4         | 0.258  | 2.818 | 2840  | 5983  | 3889 | 388  | 532  | 224  |
| NM_011461    | Spic          | -0.087 | 2.792 | 101   | 68    | 48   | 319  | 558  | 518  |
| NM_025290    | Rsph1         | -1.013 | 2.791 | 1083  | 552   | 1098 | 553  | 2981 | 1258 |
| NM_016672    | Ddc           | -0.766 | 2.790 | 1295  | 644   | 764  | 3434 | 3264 | 3572 |
| NM_175342    | Cphx          | 0.052  | 2.763 | 10    | 10    | 10   | 10   | 10   | 10   |
| NM_010139    | Epha2         | 0.775  | 2.755 | 9057  | 4561  | 5042 | 775  | 711  | 415  |
| NM_175433    | Zfp710        | 0.741  | 2.743 | 6592  | 6118  | 4038 | 1351 | 1344 | 646  |
| NM_173370    | Cds1          | 0.097  | 2.742 | 3421  | 1493  | 1217 | 2548 | 6216 | 2405 |
| NM_021356    | Gab1          | 0.526  | 2.739 | 10158 | 10081 | 9817 | 3058 | 2245 | 2211 |
| NM_019812    | Sirt1         | 0.479  | 2.723 | 5062  | 3810  | 3373 | 499  | 426  | 577  |
| NM_009366    | Tsc22d1       | 0.422  | 2.712 | 7220  | 6235  | 5216 | 211  | 133  | 107  |

|              |           |        |       |       |       |      |      |       |      |
|--------------|-----------|--------|-------|-------|-------|------|------|-------|------|
| NM_001080945 | Nanogpd   | -0.032 | 2.699 | 6773  | 78    | 38   | 127  | 376   | 214  |
| NM_194055    | Rbm35a    | 0.021  | 2.692 | 3931  | 439   | 484  | 2176 | 5354  | 4152 |
| NM_026967    | Rhebl1    | 0.668  | 2.690 | 2665  | 2293  | 2477 | 128  | 305   | 87   |
| NM_010830    | Msh6      | 0.584  | 2.687 | 6433  | 4210  | 4424 | 382  | 485   | 418  |
| NM_009224    | Snrp70    | 0.670  | 2.663 | 3907  | 4232  | 2726 | 317  | 256   | 255  |
| NM_012054    | Aoah      | 0.107  | 2.659 | 1158  | 1393  | 1549 | 7103 | 6692  | 9018 |
| NM_011898    | Spry4     | 0.123  | 2.643 | 10659 | 5835  | 5826 | 971  | 416   | 750  |
| NM_148942    | Serpinb6c | -0.160 | 2.639 | 286   | 140   | 156  | 392  | 1019  | 637  |
| NM_009173    | Siah1b    | 0.860  | 2.634 | 2178  | 1278  | 1663 | 56   | 10    | 37   |
| NM_009897    | Ckmt1     | -0.643 | 2.624 | 658   | 58    | 185  | 386  | 1529  | 1614 |
| NM_011597    | Tjp2      | 0.588  | 2.623 | 9162  | 5624  | 4975 | 2764 | 4137  | 3796 |
| NM_144898    | Msto1     | 0.546  | 2.622 | 4096  | 3200  | 2582 | 131  | 132   | 63   |
| NM_178394    | Jakmip1   | -0.002 | 2.621 | 2564  | 606   | 554  | 3636 | 4852  | 3398 |
| NM_008568    | Mcm7      | 0.641  | 2.619 | 7046  | 4933  | 4800 | 191  | 140   | 103  |
| NM_001033954 | Calca     | 0.352  | 2.617 | 528   | 324   | 103  | 512  | 319   | 571  |
| NM_175934    | Ppp1r10   | 0.852  | 2.611 | 4483  | 10255 | 4119 | 435  | 595   | 380  |
| NM_001077705 | Ptpn6     | 0.804  | 2.610 | 632   | 499   | 515  | 619  | 1134  | 531  |
| NM_007633    | Ccne1     | 0.240  | 2.604 | 3875  | 3213  | 2752 | 276  | 174   | 94   |
| NM_144800    | Mtss1     | -0.463 | 2.596 | 8655  | 2592  | 6857 | 4006 | 12789 | 3899 |
| NM_145833    | Lin28     | -0.045 | 2.591 | 4688  | 206   | 97   | 353  | 3700  | 1784 |
| NM_145973    | Ell3      | -0.149 | 2.589 | 1622  | 151   | 460  | 134  | 277   | 140  |
| NM_138586    | Exosc5    | 0.381  | 2.589 | 3298  | 2732  | 1696 | 291  | 255   | 88   |
| NM_013872    | Pmm1      | -0.534 | 2.588 | 7625  | 3408  | 3947 | 366  | 174   | 233  |
| NM_030246    | Wdr21     | -0.310 | 2.584 | 289   | 111   | 75   | 286  | 279   | 258  |
| NM_007658    | Cdc25a    | 0.351  | 2.584 | 5332  | 4386  | 4793 | 265  | 242   | 367  |
| NM_170669    | Rps15a    | 0.462  | 2.582 | 7230  | 6619  | 3408 | 111  | 192   | 122  |
| NM_010664    | Krt18     | -0.089 | 2.577 | 618   | 64    | 144  | 1004 | 1137  | 667  |
| NM_178734    | Zfp473    | 0.028  | 2.573 | 2894  | 2492  | 1763 | 245  | 273   | 186  |
| NM_001004154 | Rragb     | 0.316  | 2.551 | 1595  | 614   | 522  | 534  | 796   | 840  |

|              |               |        |       |      |      |      |      |       |       |
|--------------|---------------|--------|-------|------|------|------|------|-------|-------|
| NM_173383    | Dnd1          | -0.106 | 2.543 | 1806 | 30   | 26   | 225  | 30    | 65    |
| NM_027470    | Pak4          | 0.527  | 2.541 | 2775 | 2385 | 2249 | 881  | 818   | 480   |
| NM_023794    | Etv5          | 0.643  | 2.539 | 6646 | 3447 | 4100 | 1159 | 1534  | 1180  |
| NM_011284    | Rpa2          | 0.693  | 2.520 | 3730 | 3198 | 1975 | 163  | 138   | 101   |
| NM_144912    | Rad9b         | 0.121  | 2.497 | 3804 | 3688 | 2340 | 761  | 540   | 434   |
| NM_008563    | Mcm3          | 0.620  | 2.483 | 1495 | 2101 | 1878 | 365  | 380   | 477   |
| NM_008430    | Kcnk1         | -0.156 | 2.476 | 3066 | 302  | 388  | 2001 | 1990  | 1719  |
| NM_138745    | Mthfd1        | 0.616  | 2.474 | 5650 | 2968 | 3235 | 1139 | 1421  | 804   |
| NM_013882    | Gtse1         | 0.724  | 2.468 | 5678 | 3964 | 4380 | 362  | 377   | 386   |
| NM_175126    | Zcchc3        | -0.009 | 2.461 | 4486 | 2423 | 3721 | 134  | 162   | 204   |
| NM_001002272 | Tro           | 0.461  | 2.454 | 957  | 540  | 240  | 171  | 515   | 353   |
| NM_175655    | Hist1h4f      | 0.013  | 2.450 | 343  | 243  | 320  | 10   | 71    | 21    |
| NM_175482    | Usp28         | 0.258  | 2.449 | 4003 | 3418 | 3611 | 837  | 992   | 1218  |
| NM_007634    | Ccnf          | 0.907  | 2.448 | 4946 | 5903 | 3635 | 592  | 902   | 549   |
| NM_021453    | Pga5          | 0.029  | 2.448 | 251  | 82   | 42   | 615  | 1013  | 448   |
| NM_013636    | Ppp1cc        | 0.104  | 2.441 | 3738 | 5265 | 3067 | 269  | 522   | 181   |
| NM_026410    | Cdca5         | 0.691  | 2.440 | 3748 | 3692 | 3681 | 169  | 164   | 142   |
| NM_007974    | F2rl1         | 0.693  | 2.438 | 5431 | 1495 | 1336 | 382  | 815   | 552   |
| NM_009721    | Atp1b1        | -1.373 | 2.438 | 6289 | 633  | 1723 | 648  | 830   | 2107  |
| NM_178381    | Tmem16j       | -0.016 | 2.436 | 770  | 148  | 89   | 482  | 1633  | 764   |
| NM_021517    | Pdzk1         | -0.005 | 2.425 | 229  | 233  | 193  | 1020 | 1836  | 670   |
| NM_027491    | Rragd         | 0.375  | 2.408 | 3666 | 2144 | 1661 | 1336 | 2113  | 2854  |
| NM_008014    | Ppm1g         | 0.852  | 2.398 | 8213 | 6265 | 4178 | 409  | 431   | 214   |
| NM_029017    | Mrpl47        | 0.790  | 2.380 | 6231 | 4474 | 4042 | 178  | 321   | 100   |
| NM_134011    | Tbrg4         | 0.971  | 2.375 | 8129 | 5475 | 5248 | 320  | 264   | 352   |
| NM_028334    | Nup37         | 0.568  | 2.374 | 3419 | 7011 | 4625 | 667  | 951   | 823   |
| NM_025856    | 1700029G01Rik | 0.084  | 2.374 | 1949 | 226  | 379  | 342  | 245   | 141   |
| NM_026496    | Grhl2         | 0.015  | 2.370 | 4477 | 1468 | 1296 | 6945 | 10673 | 11329 |
| NM_011950    | Mapk13        | -0.534 | 2.363 | 2087 | 345  | 816  | 821  | 1820  | 1231  |

|              |               |        |       |       |      |      |      |      |      |
|--------------|---------------|--------|-------|-------|------|------|------|------|------|
| NM_010914    | Nfyb          | 0.524  | 2.361 | 2512  | 4911 | 3159 | 248  | 544  | 377  |
| NM_009574    | Zic2          | 0.064  | 2.359 | 9176  | 218  | 2578 | 2282 | 2108 | 2516 |
| NM_144855    | Cbs           | -0.218 | 2.352 | 3841  | 655  | 1565 | 1543 | 4186 | 1491 |
| NM_018761    | Ctnnal1       | -1.988 | 2.351 | 6132  | 2029 | 3198 | 1040 | 4576 | 886  |
| NM_009579    | Slc30a1       | 0.159  | 2.348 | 7199  | 4113 | 6312 | 459  | 217  | 244  |
| NM_009226    | Snrpd1        | 0.249  | 2.347 | 2961  | 2720 | 2981 | 228  | 213  | 370  |
| NM_177857    | A930010I20Rik | 0.080  | 2.341 | 962   | 272  | 412  | 775  | 838  | 392  |
| NM_026506    | Snrpg         | 0.484  | 2.339 | 3783  | 3406 | 3027 | 158  | 143  | 132  |
| NM_007907    | Eef2          | -0.254 | 2.335 | 11747 | 8868 | 8447 | 1717 | 1193 | 620  |
| NM_011535    | Tbx3          | 0.042  | 2.333 | 14656 | 4311 | 5628 | 2572 | 192  | 471  |
| NM_001081458 | Ppp2r5c       | 0.690  | 2.324 | 3886  | 3541 | 3017 | 1749 | 2104 | 1038 |
| NM_028455    | Arhgap8       | -0.069 | 2.324 | 1707  | 651  | 929  | 2278 | 3738 | 2485 |
| NM_153287    | Axud1         | -0.501 | 2.323 | 6470  | 5096 | 9107 | 300  | 346  | 138  |
| NM_178017    | Hmgb2l1       | 0.141  | 2.312 | 2963  | 1847 | 2315 | 621  | 695  | 712  |
| NM_029948    | Pramef12      | -0.086 | 2.293 | 500   | 115  | 149  | 266  | 326  | 159  |
| NM_007959    | Etsrp71       | -0.089 | 2.292 | 244   | 36   | 37   | 383  | 1718 | 1268 |
| NM_021329    | Rangrf        | 0.039  | 2.292 | 494   | 329  | 556  | 70   | 107  | 76   |
| NM_013753    | X99384        | -0.219 | 2.288 | 5948  | 2933 | 4541 | 2024 | 1589 | 1547 |
| NM_009657    | Aldoc         | -1.013 | 2.286 | 229   | 93   | 105  | 171  | 10   | 101  |
| NM_007607    | Car4          | -0.025 | 2.284 | 1398  | 106  | 194  | 1510 | 1814 | 1603 |
| NM_019563    | Cited4        | 0.153  | 2.274 | 2733  | 280  | 604  | 273  | 733  | 376  |
| NM_028028    | Zswim1        | -0.196 | 2.274 | 4508  | 1764 | 1589 | 167  | 121  | 106  |
| NM_021897    | Trp53inp1     | -0.443 | 2.271 | 4511  | 4798 | 3108 | 364  | 386  | 283  |
| NM_023663    | Ripk4         | 0.113  | 2.270 | 2499  | 246  | 364  | 1846 | 1731 | 2106 |
| NM_133686    | Qprt          | -0.008 | 2.265 | 614   | 194  | 283  | 633  | 1735 | 302  |
| NM_008817    | Peg3          | 0.895  | 2.259 | 5097  | 1478 | 854  | 646  | 683  | 400  |
| NM_173737    | 8430410A17Rik | 0.484  | 2.253 | 4355  | 4791 | 4119 | 337  | 1014 | 515  |
| NM_013768    | Prmt5         | 0.440  | 2.252 | 2623  | 1939 | 1902 | 285  | 219  | 229  |
| NM_010693    | Lck           | 0.515  | 2.252 | 1580  | 1491 | 641  | 225  | 456  | 241  |



|              |          |        |       |       |       |      |      |       |       |
|--------------|----------|--------|-------|-------|-------|------|------|-------|-------|
| NM_133754    | Fblim1   | 0.195  | 2.245 | 4854  | 2484  | 3145 | 828  | 566   | 175   |
| NM_001033264 | Gls2     | 0.294  | 2.244 | 4773  | 2975  | 2679 | 679  | 711   | 760   |
| NM_009413    | Tpd52l1  | 0.068  | 2.243 | 3017  | 1199  | 2450 | 2747 | 3429  | 4197  |
| NM_009483    | Utx      | 0.498  | 2.229 | 4752  | 4572  | 5092 | 875  | 1417  | 1661  |
| NM_013716    | G3bp1    | 0.208  | 2.220 | 7775  | 5373  | 6206 | 903  | 681   | 890   |
| NM_009469    | Ulk1     | 0.234  | 2.204 | 8999  | 4110  | 3908 | 828  | 769   | 257   |
| NM_007958    | Smarcad1 | 0.608  | 2.203 | 4920  | 5433  | 4093 | 811  | 1594  | 1324  |
| NM_028385    | Setd5    | 0.549  | 2.201 | 6509  | 12704 | 7201 | 974  | 2249  | 1739  |
| NM_145478    | Pim3     | 0.198  | 2.194 | 10280 | 7202  | 8753 | 287  | 308   | 123   |
| NM_022655    | Ireb2    | 0.581  | 2.193 | 3633  | 4438  | 4545 | 645  | 771   | 1242  |
| NM_054052    | B3gnt5   | 0.845  | 2.190 | 1731  | 316   | 476  | 473  | 660   | 1820  |
| NM_022316    | Smoc1    | -0.855 | 2.187 | 3705  | 1413  | 1440 | 5698 | 10858 | 4928  |
| NM_019489    | Ppie     | 0.635  | 2.185 | 2945  | 2373  | 1406 | 319  | 316   | 196   |
| NM_027263    | Apitd1   | 0.844  | 2.183 | 2747  | 1229  | 1292 | 252  | 108   | 99    |
| NM_010413    | Hdac6    | 0.410  | 2.174 | 1439  | 846   | 1553 | 248  | 267   | 210   |
| NM_138597    | Atp5o    | 0.307  | 2.174 | 3604  | 3074  | 3488 | 135  | 259   | 148   |
| NM_001018087 | Ldoc1    | 0.083  | 2.169 | 390   | 12    | 26   | 147  | 50    | 66    |
| NM_019984    | Tgm1     | -0.033 | 2.165 | 1044  | 130   | 364  | 838  | 608   | 666   |
| NM_015731    | Atp9a    | 0.005  | 2.162 | 5306  | 828   | 1466 | 3382 | 5145  | 3515  |
| NM_144907    | Sesn2    | 0.728  | 2.153 | 7741  | 7675  | 4547 | 256  | 193   | 185   |
| NM_201364    | BC055324 | 0.735  | 2.152 | 3828  | 3215  | 3844 | 601  | 827   | 1156  |
| NM_009235    | Sox15    | -0.053 | 2.151 | 3527  | 43    | 136  | 54   | 48    | 59    |
| NM_028064    | Slc39a4  | -1.365 | 2.150 | 1023  | 109   | 515  | 313  | 790   | 154   |
| NM_172303    | Phf17    | 0.353  | 2.145 | 5904  | 5832  | 4208 | 1080 | 1205  | 478   |
| NM_029341    | Capsl    | -0.021 | 2.139 | 266   | 298   | 128  | 521  | 1485  | 1766  |
| NM_198645    | Ccdc58   | 0.447  | 2.138 | 5565  | 4615  | 4933 | 573  | 523   | 560   |
| NM_020271    | Pdpx     | 0.384  | 2.137 | 2911  | 946   | 747  | 294  | 430   | 334   |
| NM_001003918 | Usp7     | 0.258  | 2.132 | 5647  | 4313  | 5797 | 872  | 984   | 1216  |
| NM_011436    | Sorl1    | -0.144 | 2.130 | 4148  | 1200  | 2437 | 5111 | 10390 | 15989 |

|              |               |        |       |       |      |      |      |       |      |
|--------------|---------------|--------|-------|-------|------|------|------|-------|------|
| NM_177640    | D030056L22Rik | 0.710  | 2.125 | 4237  | 3019 | 3422 | 108  | 178   | 89   |
| NM_025918    | Ccdc43        | 0.978  | 2.124 | 4869  | 2845 | 3391 | 373  | 283   | 433  |
| NM_013932    | Ddx25         | -0.748 | 2.123 | 1415  | 1187 | 1818 | 1805 | 2075  | 1863 |
| NM_021463    | Prps1         | 0.871  | 2.108 | 2846  | 1911 | 2452 | 183  | 356   | 224  |
| NM_146201    | Zfp553        | 0.177  | 2.103 | 9944  | 4163 | 3307 | 136  | 104   | 41   |
| NM_146100    | Ina           | -0.038 | 2.102 | 5699  | 227  | 743  | 1267 | 1813  | 2900 |
| NM_001081413 | Unc13b        | 0.462  | 2.098 | 3739  | 2150 | 2008 | 6411 | 10631 | 7489 |
| NM_031165    | Hspa8         | -0.739 | 2.098 | 5933  | 3590 | 4478 | 169  | 121   | 20   |
| NM_182995    | 6330503K22Rik | 0.818  | 2.097 | 2717  | 1791 | 1897 | 517  | 277   | 272  |
| NM_029045    | 4930432K21Rik | 0.397  | 2.097 | 1680  | 2933 | 3775 | 877  | 595   | 1260 |
| NM_010193    | Fem1b         | 0.777  | 2.097 | 9515  | 7378 | 7950 | 255  | 548   | 471  |
| NM_173382    | 2810046L04Rik | 0.976  | 2.094 | 3829  | 5098 | 3412 | 543  | 456   | 133  |
| NM_134097    | Topors        | 0.846  | 2.092 | 9426  | 7285 | 5229 | 200  | 227   | 209  |
| NM_007415    | Parp1         | 0.451  | 2.088 | 3753  | 2561 | 4018 | 808  | 733   | 671  |
| NM_001033408 | Gm817         | -0.055 | 2.087 | 492   | 95   | 181  | 768  | 1614  | 2265 |
| NM_023331    | Mrpl46        | 0.515  | 2.087 | 4836  | 3694 | 2676 | 160  | 193   | 96   |
| NM_011588    | Trim28        | 0.924  | 2.086 | 8149  | 5593 | 4285 | 306  | 182   | 110  |
| NM_026091    | 1700037H04Rik | -0.012 | 2.084 | 1892  | 3601 | 4146 | 484  | 172   | 299  |
| NM_008009    | Fgfbp1        | -0.097 | 2.084 | 61    | 27   | 14   | 180  | 194   | 120  |
| NM_027521    | Hmha1         | 0.502  | 2.076 | 742   | 326  | 342  | 671  | 714   | 327  |
| NM_175287    | A430005L14Rik | 0.460  | 2.073 | 3058  | 2747 | 2071 | 119  | 291   | 25   |
| NM_015818    | Hs6st1        | 0.200  | 2.068 | 14807 | 4243 | 5261 | 1140 | 875   | 773  |
| NM_024428    | Dpy30         | 0.637  | 2.066 | 4959  | 4850 | 4247 | 509  | 817   | 587  |
| NM_053261    | Impa2         | -0.341 | 2.065 | 7258  | 3271 | 4288 | 809  | 813   | 716  |
| NM_138595    | Gldc          | -4.041 | 2.063 | 3884  | 1043 | 2583 | 1525 | 8019  | 2891 |
| NM_009678    | Ap1m2         | -0.049 | 2.061 | 1615  | 128  | 112  | 575  | 902   | 790  |
| NM_025641    | Uqcrh         | 0.208  | 2.057 | 3759  | 5395 | 3448 | 150  | 168   | 112  |
| NM_027106    | Avpi1         | 0.326  | 2.057 | 4355  | 2898 | 3277 | 272  | 127   | 136  |
| NM_133692    | Pold3         | 0.873  | 2.057 | 2863  | 3049 | 2165 | 603  | 865   | 416  |

|              |               |        |       |      |      |      |      |      |      |
|--------------|---------------|--------|-------|------|------|------|------|------|------|
| NM_026391    | Ppp2r2d       | 0.720  | 2.054 | 6839 | 4636 | 4207 | 558  | 594  | 492  |
| NM_008504    | Gzmm          | 0.452  | 2.048 | 106  | 86   | 81   | 267  | 87   | 125  |
| NM_146083    | Sfrs7         | 0.692  | 2.046 | 7044 | 6732 | 5818 | 161  | 352  | 212  |
| NM_009471    | Umps          | 0.277  | 2.046 | 3776 | 3155 | 3578 | 348  | 181  | 445  |
| NM_029747    | 2410137M14Rik | -0.022 | 2.042 | 680  | 101  | 93   | 124  | 1234 | 634  |
| NM_010043    | Des           | 0.115  | 2.029 | 1321 | 362  | 233  | 859  | 527  | 1377 |
| NM_025394    | Tomm7         | 0.322  | 2.024 | 1056 | 3154 | 1520 | 71   | 169  | 69   |
| NM_025281    | Lyar          | 0.991  | 2.024 | 5255 | 3539 | 3180 | 399  | 374  | 182  |
| NM_011978    | Slc27a2       | 0.424  | 2.022 | 4596 | 194  | 496  | 1429 | 4106 | 5099 |
| NM_172826    | Dact2         | -0.050 | 2.021 | 4815 | 774  | 2340 | 667  | 2243 | 1037 |
| NM_011420    | Smn1          | 0.850  | 2.017 | 4520 | 3189 | 3259 | 230  | 462  | 267  |
| NM_028115    | Trub1         | 0.239  | 2.012 | 2507 | 1861 | 2473 | 838  | 902  | 906  |
| NM_024216    | Gpn3          | 0.743  | 2.008 | 4394 | 2837 | 2389 | 225  | 221  | 133  |
| NM_011561    | Tdg           | 0.668  | 2.001 | 2969 | 4465 | 3004 | 420  | 457  | 377  |
| NM_007557    | Bmp7          | -0.012 | 2.001 | 5997 | 798  | 1254 | 5810 | 2243 | 4452 |
| NM_011176    | St14          | 0.028  | 1.999 | 4433 | 369  | 983  | 1442 | 3432 | 3890 |
| NM_021390    | Sall1         | 0.048  | 1.997 | 7736 | 150  | 1320 | 1063 | 622  | 3469 |
| NM_001013756 | Grhl3         | 0.027  | 1.997 | 1946 | 332  | 638  | 1818 | 4979 | 1941 |
| NM_177099    | Lefty2        | 0.065  | 1.995 | 1005 | 37   | 409  | 778  | 786  | 1380 |
| NM_177775    | D9Erttd280e   | -0.065 | 1.991 | 2487 | 326  | 787  | 2948 | 4216 | 3944 |
| NM_001033156 | Fbxo33        | 0.283  | 1.989 | 5294 | 3871 | 3717 | 306  | 377  | 305  |
| NM_025616    | Timm50        | 0.988  | 1.988 | 3507 | 2399 | 2587 | 206  | 287  | 79   |
| NM_030676    | Nr5a2         | -0.025 | 1.982 | 6991 | 874  | 2626 | 3993 | 8317 | 9840 |
| NM_021876    | Eed           | 0.485  | 1.979 | 6271 | 4627 | 3111 | 457  | 306  | 432  |
| NM_001082532 | Pigyl         | -0.354 | 1.976 | 3820 | 1262 | 1893 | 80   | 66   | 18   |
| NM_010436    | H2afx         | 0.673  | 1.973 | 6237 | 3659 | 4116 | 40   | 25   | 11   |
| NM_019674    | Ppp4c         | 0.946  | 1.965 | 3591 | 3157 | 2436 | 226  | 198  | 88   |
| NM_021308    | Piwil2        | -0.053 | 1.965 | 529  | 325  | 431  | 2280 | 1918 | 1987 |
| NM_011155    | Ppp5c         | 0.738  | 1.963 | 5233 | 3475 | 2914 | 512  | 485  | 273  |

|              |                 |        |       |      |      |      |       |       |       |
|--------------|-----------------|--------|-------|------|------|------|-------|-------|-------|
| NM_016875    | Ybx2            | 0.190  | 1.962 | 1318 | 375  | 527  | 642   | 1908  | 1820  |
| NM_153783    | Paox            | 0.406  | 1.961 | 1972 | 1635 | 1290 | 177   | 151   | 116   |
| NM_028314    | 2700097O09Rik   | 0.634  | 1.961 | 2060 | 1572 | 1419 | 720   | 976   | 539   |
| NM_007921    | Elf3            | 0.053  | 1.960 | 1199 | 46   | 107  | 211   | 574   | 327   |
| NM_026507    | Zwilch          | 0.964  | 1.959 | 5816 | 4992 | 4939 | 351   | 697   | 868   |
| NM_053271    | Rims2           | -0.003 | 1.957 | 7731 | 4535 | 4572 | 11322 | 17920 | 23622 |
| NM_133191    | Eps8l2          | 0.013  | 1.956 | 1691 | 447  | 380  | 1622  | 1066  | 683   |
| NM_001081150 | Lonrf1          | 0.496  | 1.950 | 6036 | 4607 | 2767 | 1117  | 641   | 614   |
| NM_030093    | 3300001G02Rik   | 0.794  | 1.947 | 2839 | 2049 | 2600 | 236   | 152   | 106   |
| NM_178684    | C130032J12Rik   | 0.438  | 1.946 | 2918 | 4324 | 3941 | 382   | 619   | 662   |
| NM_008993    | Pxmp2           | 0.051  | 1.938 | 3913 | 2697 | 2200 | 337   | 200   | 174   |
| NM_010926    | Cox4nb          | -0.027 | 1.936 | 5877 | 4929 | 6012 | 474   | 443   | 414   |
| NM_021287    | Spnb3           | 0.070  | 1.936 | 4207 | 778  | 1314 | 3779  | 4055  | 4415  |
| NM_016966    | Phgdh           | 0.798  | 1.934 | 1996 | 4044 | 1894 | 687   | 750   | 189   |
| NM_027891    | 1200011O22Rik   | 0.536  | 1.932 | 2778 | 3043 | 3451 | 386   | 474   | 290   |
| NM_146176    | Cnot3           | 0.461  | 1.929 | 5369 | 4211 | 3169 | 392   | 234   | 167   |
| NM_026943    | Snrpd2          | 0.688  | 1.928 | 2000 | 2343 | 1843 | 147   | 71    | 28    |
| NM_001033966 | Ak2             | 0.634  | 1.920 | 2130 | 3330 | 3063 | 571   | 350   | 170   |
| NM_013769    | Tjp3            | 0.014  | 1.919 | 3124 | 579  | 603  | 1078  | 3294  | 2313  |
| NM_029441    | Cdyl2           | 0.656  | 1.918 | 5855 | 3047 | 4347 | 3231  | 2669  | 3357  |
| NM_001042670 | ENSMUSG00000005 | 0.535  | 1.917 | 122  | 838  | 397  | 61    | 182   | 57    |
| NM_133777    | Ube2s           | 0.565  | 1.916 | 5247 | 5147 | 3474 | 59    | 60    | 63    |
| NM_145706    | Nup43           | 0.658  | 1.914 | 1957 | 1249 | 1701 | 219   | 387   | 392   |
| NM_001012335 | Mdk             | 0.006  | 1.914 | 1611 | 10   | 233  | 222   | 70    | 428   |
| NM_030702    | Senp3           | -0.039 | 1.913 | 5783 | 3118 | 4090 | 296   | 207   | 226   |
| NM_009904    | Clgn            | 0.117  | 1.911 | 1224 | 218  | 572  | 1867  | 2852  | 4275  |
| NM_023597    | Wdr31           | 0.518  | 1.910 | 1367 | 1267 | 702  | 467   | 590   | 231   |
| NM_009836    | Cct3            | 0.947  | 1.909 | 6630 | 6276 | 3088 | 366   | 725   | 212   |
| NM_026398    | Pop5            | 0.114  | 1.906 | 4299 | 3573 | 2442 | 382   | 114   | 95    |

|              |               |        |       |       |       |       |      |      |      |
|--------------|---------------|--------|-------|-------|-------|-------|------|------|------|
| NM_011622    | Tom1          | -0.261 | 1.900 | 3520  | 2041  | 3165  | 1017 | 839  | 691  |
| NM_001081176 | Polr3g        | 0.398  | 1.895 | 5202  | 3677  | 5163  | 603  | 833  | 919  |
| NM_029231    | Pelp1         | 0.274  | 1.893 | 4566  | 2802  | 3555  | 371  | 307  | 398  |
| NM_001037746 | AU021838      | 0.558  | 1.890 | 2064  | 2919  | 1998  | 219  | 130  | 107  |
| NM_025495    | Cenpp         | 0.888  | 1.890 | 5233  | 6683  | 7166  | 3754 | 4428 | 5341 |
| NM_177821    | Ep300         | 0.607  | 1.890 | 6755  | 8493  | 7763  | 1140 | 1658 | 1760 |
| NM_008894    | Pold2         | 0.523  | 1.887 | 2086  | 1772  | 1912  | 253  | 246  | 225  |
| NM_133834    | Hnrnpf        | 0.779  | 1.886 | 13466 | 16522 | 11827 | 292  | 526  | 325  |
| NM_029868    | Gpbp1l1       | 0.413  | 1.881 | 4308  | 5666  | 2959  | 482  | 763  | 394  |
| NM_008893    | Pola2         | 0.565  | 1.873 | 3072  | 2537  | 3510  | 489  | 802  | 468  |
| NM_026584    | Gtf2e2        | 0.722  | 1.872 | 3299  | 3477  | 2494  | 608  | 644  | 536  |
| NM_023635    | Rab27a        | -1.088 | 1.871 | 2397  | 583   | 1455  | 1375 | 2920 | 1973 |
| NM_172723    | Adap1         | 0.076  | 1.871 | 4070  | 587   | 971   | 1762 | 6273 | 3391 |
| NM_019402    | Pabpn1        | 0.779  | 1.867 | 3783  | 3300  | 3261  | 105  | 78   | 114  |
| NM_009853    | Cd68          | 0.106  | 1.865 | 182   | 146   | 142   | 99   | 56   | 65   |
| NM_183275    | 1110002N22Rik | 0.184  | 1.862 | 4793  | 2843  | 3111  | 204  | 139  | 203  |
| NM_025928    | Pmf1          | 0.870  | 1.860 | 3497  | 2082  | 1834  | 401  | 306  | 134  |
| NM_133928    | Chchd4        | 0.608  | 1.860 | 5956  | 7209  | 6381  | 229  | 306  | 254  |
| NM_024173    | Atp6v1g1      | 0.503  | 1.860 | 1791  | 4461  | 2644  | 135  | 222  | 67   |
| NM_172135    | Mterf         | 0.399  | 1.859 | 227   | 725   | 362   | 45   | 48   | 40   |
| NM_001081203 | Sbno1         | 0.981  | 1.854 | 5714  | 4867  | 3736  | 815  | 1246 | 754  |
| NM_008316    | Hus1          | 0.727  | 1.852 | 3245  | 2674  | 3337  | 432  | 461  | 458  |
| NM_001083902 | Slc12a8       | -0.219 | 1.850 | 2769  | 1310  | 1748  | 5688 | 5927 | 5029 |
| NM_025660    | Ribc1         | 0.564  | 1.850 | 1944  | 1909  | 2101  | 66   | 218  | 124  |
| NM_009876    | Cdkn1c        | -2.499 | 1.849 | 1582  | 271   | 811   | 2111 | 491  | 977  |
| NM_001002929 | Nup85         | 0.329  | 1.847 | 4217  | 3055  | 3164  | 437  | 468  | 349  |
| NM_008567    | Mcm6          | 0.966  | 1.847 | 3390  | 2289  | 2588  | 555  | 944  | 756  |
| NM_019511    | Ramp3         | -0.018 | 1.847 | 1038  | 349   | 672   | 1729 | 1536 | 790  |
| NM_011487    | Stat4         | -0.059 | 1.843 | 1429  | 706   | 828   | 2900 | 4710 | 7388 |

|              |               |        |       |      |      |      |       |       |       |
|--------------|---------------|--------|-------|------|------|------|-------|-------|-------|
| NM_013566    | Itgb7         | 0.345  | 1.835 | 1034 | 387  | 415  | 854   | 746   | 875   |
| NM_172562    | Tada2l        | 0.348  | 1.834 | 3625 | 3402 | 3870 | 1257  | 1391  | 1354  |
| NM_009077    | Rpl18         | 0.396  | 1.833 | 7800 | 7165 | 4295 | 103   | 87    | 50    |
| NM_001033759 | Tmem2         | 0.127  | 1.827 | 4979 | 5739 | 6718 | 1724  | 2316  | 1710  |
| NM_008838    | Pigf          | 0.684  | 1.827 | 5891 | 5736 | 5653 | 599   | 884   | 801   |
| NM_175930    | Rapgef5       | -0.239 | 1.827 | 5619 | 1593 | 2459 | 7212  | 8279  | 8130  |
| NM_134013    | Psme4         | 0.642  | 1.824 | 7251 | 5184 | 5625 | 2217  | 2058  | 2846  |
| NM_013929    | Siva1         | 0.600  | 1.824 | 4898 | 3844 | 3189 | 351   | 234   | 38    |
| NM_026041    | Rrp15         | 0.318  | 1.819 | 4967 | 4263 | 4257 | 413   | 631   | 598   |
| NM_145429    | Arrb2         | 0.715  | 1.818 | 2677 | 2157 | 2516 | 569   | 367   | 193   |
| NM_008480    | Lama1         | -0.967 | 1.811 | 4934 | 2531 | 4970 | 3582  | 7517  | 4528  |
| NM_007525    | Bard1         | 0.643  | 1.810 | 3891 | 3569 | 3844 | 1219  | 1208  | 2161  |
| NM_008558    | Max           | 0.032  | 1.808 | 4266 | 4723 | 3674 | 576   | 796   | 522   |
| NM_177475    | Suhw2         | 0.096  | 1.806 | 3534 | 3111 | 3484 | 266   | 443   | 165   |
| NM_011870    | Cib1          | 0.150  | 1.806 | 2930 | 2598 | 2768 | 177   | 58    | 103   |
| NR_001572    | Nudc-ps1      | 0.663  | 1.802 | 24   | 30   | 29   | 34    | 106   | 26    |
| NM_146252    | Tbc1d13       | -0.576 | 1.800 | 5030 | 3012 | 4385 | 386   | 348   | 334   |
| NM_152915    | Dner          | 0.349  | 1.798 | 4559 | 2232 | 3043 | 13737 | 11011 | 16505 |
| NM_027250    | 2010305A19Rik | 0.583  | 1.798 | 3317 | 1700 | 1214 | 230   | 204   | 147   |
| NM_011552    | Tcof1         | 0.644  | 1.798 | 3558 | 2230 | 2990 | 898   | 850   | 744   |
| NM_026576    | Etaa1         | 0.539  | 1.797 | 3182 | 3293 | 3392 | 305   | 242   | 363   |
| NM_177613    | Cdc34         | -0.161 | 1.795 | 6282 | 4768 | 6291 | 180   | 232   | 195   |
| NM_008184    | Gstm6         | -0.374 | 1.795 | 338  | 56   | 116  | 134   | 286   | 101   |
| NM_145632    | Polr2h        | 0.207  | 1.790 | 2613 | 2304 | 3002 | 102   | 40    | 118   |
| NM_177897    | B4galnt4      | -0.073 | 1.787 | 4024 | 383  | 599  | 613   | 2355  | 1583  |
| NM_027445    | Rnf167        | -0.267 | 1.787 | 4791 | 4264 | 4597 | 242   | 199   | 115   |
| NM_174868    | C030011O14Rik | 0.504  | 1.785 | 3214 | 765  | 1166 | 869   | 1378  | 842   |
| NM_153541    | Zbtb8b        | -0.051 | 1.783 | 1945 | 152  | 209  | 456   | 2512  | 1001  |
| NM_145402    | Tmem51        | -2.419 | 1.771 | 4679 | 654  | 1901 | 1497  | 1768  | 1200  |

|              |               |        |       |      |       |      |       |       |       |
|--------------|---------------|--------|-------|------|-------|------|-------|-------|-------|
| NM_139149    | Fus           | 0.834  | 1.770 | 5506 | 4745  | 3582 | 216   | 217   | 267   |
| NM_027123    | 2310010B21Rik | 0.214  | 1.770 | 3161 | 3258  | 4110 | 210   | 203   | 281   |
| NM_023626    | Ing3          | 0.458  | 1.768 | 2596 | 3935  | 2385 | 421   | 908   | 740   |
| NM_009423    | Traf4         | -0.145 | 1.762 | 6799 | 5865  | 7326 | 433   | 286   | 160   |
| NM_010948    | Nudc          | 0.948  | 1.759 | 4003 | 3831  | 2453 | 157   | 439   | 172   |
| NM_175491    | Smcr8         | 0.312  | 1.758 | 6769 | 4930  | 7631 | 151   | 80    | 75    |
| NM_175263    | Notum         | -0.262 | 1.755 | 5680 | 375   | 1119 | 2055  | 1628  | 2204  |
| NM_133815    | Lbr           | 0.766  | 1.753 | 4880 | 4175  | 4678 | 809   | 499   | 591   |
| NM_013608    | Naca          | 0.138  | 1.750 | 8718 | 10657 | 7342 | 332   | 348   | 151   |
| NM_010364    | Gtf2h4        | 0.379  | 1.748 | 1990 | 2618  | 2552 | 143   | 264   | 222   |
| NM_172567    | Mettl2        | 0.416  | 1.747 | 4504 | 2684  | 3634 | 283   | 585   | 471   |
| NM_009096    | Rps6          | 0.461  | 1.744 | 6450 | 5751  | 3983 | 92    | 60    | 12    |
| NM_007422    | Adss          | 0.587  | 1.742 | 4029 | 5002  | 4954 | 723   | 801   | 846   |
| NM_026065    | D10Ertd322e   | 0.422  | 1.742 | 3764 | 3861  | 2937 | 392   | 501   | 527   |
| NM_053122    | Imp2l         | 0.416  | 1.741 | 5657 | 7522  | 5727 | 22600 | 19424 | 20419 |
| NM_009211    | Smarcc1       | 0.480  | 1.740 | 4375 | 3988  | 4029 | 1684  | 1923  | 2046  |
| NM_173765    | Aasdh         | 0.484  | 1.739 | 2913 | 3182  | 1825 | 723   | 588   | 296   |
| NM_025304    | Lcmt1         | 0.435  | 1.738 | 3685 | 2091  | 2102 | 1075  | 861   | 622   |
| NM_010274    | Gpd2          | 0.959  | 1.737 | 4314 | 5151  | 5624 | 2706  | 2431  | 3117  |
| NM_001005223 | Znhit3        | 0.357  | 1.732 | 3825 | 2472  | 2498 | 76    | 232   | 110   |
| NM_001004365 | Actr3b        | 0.012  | 1.731 | 5609 | 1436  | 1579 | 2151  | 4602  | 2177  |
| NM_133985    | Oxsr1         | 0.635  | 1.730 | 395  | 455   | 467  | 783   | 1258  | 1466  |
| NM_019706    | Rnf138        | -0.055 | 1.729 | 6417 | 4622  | 5995 | 428   | 803   | 713   |
| NM_030724    | Uck2          | 0.611  | 1.724 | 8211 | 5189  | 7116 | 1741  | 1587  | 1446  |
| NM_172735    | Zc3hc1        | 0.986  | 1.723 | 1340 | 2368  | 1708 | 342   | 519   | 450   |
| NM_007573    | C1qbp         | 0.118  | 1.722 | 5406 | 3433  | 3502 | 255   | 225   | 124   |
| NM_009532    | Xrcc1         | 0.939  | 1.722 | 2255 | 1568  | 1696 | 622   | 700   | 304   |
| NM_028603    | 2410081M15Rik | -0.820 | 1.721 | 4476 | 2157  | 2595 | 372   | 1579  | 209   |
| NM_011274    | C80913        | 0.764  | 1.721 | 4292 | 2955  | 2477 | 926   | 1204  | 752   |

|           |               |        |       |       |      |       |      |      |      |
|-----------|---------------|--------|-------|-------|------|-------|------|------|------|
| NM_026871 | Hint2         | 0.405  | 1.721 | 2543  | 2054 | 1813  | 149  | 152  | 69   |
| NM_181410 | Gtf2h3        | 0.618  | 1.718 | 3991  | 4267 | 2494  | 244  | 379  | 150  |
| NM_027654 | Pcgf6         | 0.357  | 1.715 | 2830  | 2753 | 3162  | 285  | 462  | 514  |
| NM_172304 | Tex10         | 0.892  | 1.708 | 3668  | 4641 | 2808  | 406  | 970  | 554  |
| NM_007886 | Dtnb          | 0.262  | 1.702 | 5385  | 3679 | 3365  | 5074 | 4497 | 3155 |
| NM_017479 | Myst4         | -0.126 | 1.702 | 6460  | 5159 | 7230  | 2958 | 4160 | 4360 |
| NM_008565 | Mcm4          | 0.724  | 1.702 | 6807  | 3709 | 4762  | 228  | 378  | 434  |
| NM_010021 | Dazl          | -0.079 | 1.701 | 350   | 236  | 441   | 681  | 582  | 1945 |
| NM_010638 | Klf9          | -0.115 | 1.700 | 17318 | 9993 | 11331 | 456  | 781  | 534  |
| NM_007475 | Rplp0         | 0.680  | 1.699 | 2997  | 3328 | 2404  | 101  | 102  | 67   |
| NM_178788 | Dctd          | 0.595  | 1.696 | 2017  | 2093 | 2008  | 938  | 718  | 423  |
| NM_153405 | Rbm45         | 0.270  | 1.691 | 4585  | 3282 | 4656  | 283  | 145  | 391  |
| NM_146036 | Ahsa1         | 0.305  | 1.691 | 6514  | 5442 | 4236  | 170  | 258  | 110  |
| NM_018776 | Crlf3         | 0.454  | 1.690 | 4902  | 3526 | 3168  | 774  | 1104 | 838  |
| NM_022653 | Thop1         | 0.629  | 1.689 | 2191  | 2138 | 2258  | 409  | 765  | 369  |
| NM_146116 | Tubb2c        | 0.341  | 1.688 | 6579  | 3868 | 4694  | 125  | 10   | 25   |
| NM_008239 | Foxq1         | 0.081  | 1.688 | 6085  | 238  | 1978  | 1502 | 831  | 2185 |
| NM_026453 | Mak16         | 0.990  | 1.687 | 5354  | 3823 | 2776  | 159  | 90   | 133  |
| NM_011390 | Slc12a7       | 0.489  | 1.683 | 5760  | 3044 | 4025  | 1251 | 1479 | 1268 |
| NM_021889 | Syt9          | 0.413  | 1.682 | 5491  | 855  | 937   | 3965 | 4710 | 3203 |
| NM_019505 | Dgke          | 0.232  | 1.682 | 7735  | 3591 | 4702  | 476  | 607  | 707  |
| NM_199042 | Thap1         | 0.343  | 1.680 | 4768  | 3809 | 2871  | 236  | 142  | 100  |
| NM_007858 | Diap1         | 0.193  | 1.679 | 4578  | 3601 | 5156  | 1815 | 2271 | 2330 |
| NM_178845 | Zfp277        | 0.597  | 1.677 | 5088  | 4339 | 4983  | 2517 | 2442 | 1760 |
| NM_021535 | Smu1          | 0.739  | 1.675 | 3935  | 4021 | 2614  | 292  | 365  | 185  |
| NM_177680 | A730098D12Rik | 0.775  | 1.674 | 3647  | 5097 | 2820  | 318  | 642  | 472  |
| NM_199322 | Dot1l         | 0.977  | 1.673 | 5456  | 6436 | 5247  | 1266 | 1380 | 849  |
| NM_026964 | Ccdc124       | 0.316  | 1.672 | 3490  | 2036 | 2262  | 116  | 82   | 75   |
| NM_016706 | Coil          | -0.114 | 1.669 | 3320  | 1896 | 2239  | 493  | 362  | 363  |



|              |               |        |       |      |      |      |      |      |      |
|--------------|---------------|--------|-------|------|------|------|------|------|------|
| NM_008630    | Mt2           | 0.182  | 1.669 | 3387 | 1879 | 2318 | 119  | 32   | 62   |
| NM_019685    | Ruvbl1        | 0.616  | 1.668 | 2792 | 3965 | 2781 | 728  | 985  | 611  |
| NM_145587    | Sbk           | -0.239 | 1.668 | 6354 | 1985 | 2669 | 1845 | 996  | 288  |
| NM_207202    | Ccdc120       | 0.078  | 1.667 | 570  | 102  | 473  | 182  | 208  | 126  |
| NM_010256    | Gart          | -0.024 | 1.666 | 4577 | 3780 | 3765 | 555  | 527  | 634  |
| NM_145974    | C330016O10Rik | 0.140  | 1.664 | 9441 | 2802 | 5157 | 652  | 374  | 273  |
| NM_011288    | Mrpl23        | 0.938  | 1.664 | 2337 | 2118 | 1136 | 351  | 234  | 62   |
| NM_178891    | Prmt6         | 0.522  | 1.664 | 4801 | 6817 | 4114 | 102  | 87   | 72   |
| NM_011937    | Gnpda1        | 0.544  | 1.663 | 4407 | 2982 | 3377 | 183  | 367  | 204  |
| NM_011503    | Stxbp2        | 0.905  | 1.660 | 2069 | 2777 | 2011 | 294  | 616  | 306  |
| NM_172991    | C030048B08Rik | 0.721  | 1.659 | 6353 | 4515 | 3678 | 290  | 190  | 145  |
| NM_172253    | Twistnb       | 0.700  | 1.658 | 3787 | 2982 | 2487 | 229  | 298  | 171  |
| NM_023059    | Sigirr        | -0.184 | 1.654 | 2834 | 139  | 760  | 309  | 1092 | 632  |
| NM_183178    | Fsd1          | -0.587 | 1.652 | 1260 | 341  | 850  | 493  | 2819 | 313  |
| NM_001081188 | Exosc7        | 0.372  | 1.652 | 6231 | 4067 | 4938 | 488  | 460  | 367  |
| NM_016907    | Spint1        | -0.013 | 1.651 | 6404 | 322  | 1002 | 592  | 2631 | 1910 |
| NM_009266    | Sephs2        | 0.070  | 1.651 | 4994 | 2716 | 2335 | 131  | 75   | 25   |
| NM_028298    | Zfp655        | 0.360  | 1.648 | 4847 | 6192 | 5244 | 229  | 375  | 355  |
| NM_178618    | 2310040C09Rik | -0.161 | 1.647 | 3257 | 226  | 649  | 1793 | 1277 | 1570 |
| NM_175045    | Bcor          | 0.488  | 1.646 | 4956 | 3543 | 4700 | 3353 | 697  | 437  |
| NM_011317    | Khdrbs1       | 0.931  | 1.643 | 7266 | 6962 | 4817 | 374  | 626  | 356  |
| NM_026030    | Eif2s2        | -0.791 | 1.641 | 8127 | 7037 | 5122 | 223  | 654  | 512  |
| NM_175654    | Hist1h4d      | 0.037  | 1.639 | 382  | 539  | 469  | 10   | 50   | 17   |
| NM_178208    | Hist1h4c      | -0.248 | 1.638 | 145  | 194  | 248  | 21   | 37   | 44   |
| NM_133351    | Prss8         | -0.047 | 1.637 | 1161 | 11   | 33   | 232  | 146  | 67   |
| NM_178193    | Hist1h4b      | 0.104  | 1.636 | 98   | 154  | 205  | 10   | 20   | 41   |
| NM_145625    | Eif4b         | 0.234  | 1.634 | 5983 | 4906 | 4983 | 521  | 414  | 569  |
| NM_011914    | Whsc2         | 0.886  | 1.634 | 7326 | 5195 | 3697 | 982  | 567  | 318  |
| NM_012015    | H2afy         | 0.487  | 1.633 | 5369 | 4541 | 6003 | 2059 | 1694 | 1292 |

|              |          |        |       |      |      |      |      |      |      |
|--------------|----------|--------|-------|------|------|------|------|------|------|
| NM_207212    | Wtip     | 0.023  | 1.632 | 2961 | 2894 | 1841 | 450  | 448  | 170  |
| NM_134084    | Ppif     | -0.264 | 1.632 | 2029 | 2633 | 3895 | 406  | 185  | 196  |
| NM_016745    | Atp2a3   | 0.224  | 1.631 | 2228 | 447  | 688  | 3404 | 3590 | 4961 |
| NM_001039657 | Mtl5     | -0.157 | 1.623 | 1286 | 786  | 956  | 1140 | 1190 | 953  |
| NM_019730    | Nme3     | 0.050  | 1.622 | 4089 | 3301 | 3348 | 43   | 75   | 33   |
| NM_146247    | BC024814 | 0.547  | 1.613 | 2731 | 2040 | 2607 | 668  | 691  | 540  |
| NM_001009951 | BC088983 | 0.880  | 1.612 | 3395 | 3634 | 2591 | 419  | 280  | 251  |
| NM_146218    | Rfwd3    | 0.408  | 1.611 | 3061 | 2920 | 3390 | 465  | 282  | 399  |
| NM_027000    | Gtpbp4   | 0.399  | 1.607 | 5453 | 4880 | 5102 | 458  | 356  | 597  |
| NM_008619    | Mov10    | -0.031 | 1.606 | 2989 | 4023 | 3101 | 405  | 562  | 160  |
| NM_026551    | Dcakd    | 0.066  | 1.604 | 2078 | 2186 | 1754 | 591  | 623  | 465  |
| NM_007918    | Eif4ebp1 | 0.810  | 1.603 | 8435 | 8012 | 4292 | 409  | 321  | 194  |
| NM_025589    | Rpl36al  | 0.384  | 1.602 | 5643 | 4753 | 3931 | 174  | 54   | 34   |
| NM_175137    | Vars2    | 0.594  | 1.597 | 2732 | 3610 | 3232 | 348  | 463  | 259  |
| NM_019731    | Nme4     | -0.379 | 1.595 | 1998 | 1296 | 1930 | 282  | 209  | 175  |
| NM_001024699 | Zbtb45   | 0.534  | 1.594 | 4172 | 2104 | 1914 | 145  | 90   | 30   |
| NM_029674    | Got1l1   | -2.526 | 1.594 | 58   | 17   | 10   | 189  | 489  | 76   |
| NM_026549    | Pdcd2l   | 0.576  | 1.594 | 4195 | 2660 | 2295 | 291  | 170  | 69   |
| NM_028020    | Cpsf3l   | 0.904  | 1.587 | 3946 | 4665 | 4120 | 324  | 294  | 249  |
| NM_153173    | Hist1h4h | -0.163 | 1.585 | 730  | 1329 | 1332 | 45   | 10   | 10   |
| NM_025504    | Atp5sl   | 0.016  | 1.583 | 1275 | 853  | 895  | 129  | 179  | 81   |
| NM_145540    | Ints3    | 0.528  | 1.582 | 3401 | 3590 | 2730 | 977  | 920  | 366  |
| NM_030678    | Gys1     | 0.321  | 1.578 | 5000 | 4505 | 3319 | 454  | 402  | 150  |
| NM_026175    | Sf3a1    | 0.910  | 1.578 | 3928 | 3527 | 3819 | 506  | 719  | 539  |
| NM_019673    | Actl6a   | 0.800  | 1.577 | 4640 | 4088 | 3089 | 265  | 462  | 267  |
| NM_013892    | Pcsk1n   | 0.095  | 1.576 | 1626 | 92   | 176  | 519  | 539  | 1103 |
| NM_028006    | Tube1    | 0.764  | 1.572 | 2537 | 3247 | 2891 | 277  | 269  | 494  |
| NM_013754    | Insl6    | 0.755  | 1.569 | 136  | 530  | 231  | 183  | 195  | 187  |
| NM_022654    | Lrdd     | 0.391  | 1.568 | 3125 | 1416 | 2197 | 274  | 171  | 58   |

|           |               |        |       |      |      |      |       |      |       |
|-----------|---------------|--------|-------|------|------|------|-------|------|-------|
| NM_026028 | Ccdc77        | 0.872  | 1.567 | 1550 | 2897 | 1319 | 345   | 737  | 579   |
| NM_026080 | Mrps24        | -0.242 | 1.566 | 6064 | 2975 | 3661 | 160   | 111  | 49    |
| NM_080470 | Smc1b         | -0.058 | 1.565 | 246  | 574  | 601  | 2791  | 2922 | 5527  |
| NM_026543 | 3010026O09Rik | 0.475  | 1.565 | 3900 | 2355 | 2213 | 790   | 741  | 658   |
| NM_146074 | Tfb1m         | 0.426  | 1.560 | 2070 | 2024 | 1765 | 956   | 999  | 1110  |
| NM_009360 | Tfam          | 0.168  | 1.560 | 3761 | 3202 | 4022 | 301   | 390  | 371   |
| NM_172265 | Eif2b5        | 0.241  | 1.560 | 3702 | 2676 | 3441 | 130   | 228  | 200   |
| NM_011813 | Fiz1          | 0.800  | 1.559 | 4466 | 1447 | 1419 | 250   | 125  | 95    |
| NM_130881 | Pabpc4        | 0.459  | 1.559 | 1564 | 2213 | 1952 | 247   | 366  | 191   |
| NM_134021 | Pnpo          | -0.349 | 1.559 | 1839 | 1140 | 2961 | 314   | 842  | 155   |
| NM_033077 | D1Pas1        | -0.071 | 1.557 | 663  | 32   | 58   | 510   | 133  | 108   |
| NM_175031 | Stk36         | -0.353 | 1.555 | 2731 | 2517 | 3407 | 1470  | 1024 | 934   |
| NM_133992 | Usp52         | 0.238  | 1.552 | 2325 | 3183 | 2450 | 528   | 735  | 592   |
| NM_025371 | Acy1          | 0.493  | 1.549 | 894  | 802  | 931  | 302   | 135  | 189   |
| NM_009902 | Cldn3         | -0.079 | 1.548 | 2791 | 20   | 287  | 176   | 1406 | 1766  |
| NM_181406 | Rars2         | 0.832  | 1.548 | 4829 | 5039 | 3251 | 1038  | 723  | 675   |
| NM_026119 | Med4          | 0.048  | 1.546 | 2970 | 2166 | 3339 | 167   | 170  | 311   |
| NM_026932 | Ebna1bp2      | 0.824  | 1.545 | 3298 | 3678 | 3167 | 177   | 205  | 108   |
| NM_181444 | Gprc5a        | 0.899  | 1.545 | 1577 | 1137 | 936  | 1124  | 1046 | 370   |
| NM_019570 | Rev1          | -0.087 | 1.545 | 5221 | 3530 | 4553 | 1388  | 1181 | 2283  |
| NM_145573 | Mrps35        | 0.684  | 1.544 | 4516 | 4932 | 3580 | 648   | 1004 | 637   |
| NM_017476 | Akap8l        | -0.502 | 1.543 | 8683 | 6844 | 6731 | 578   | 973  | 729   |
| NM_025825 | Appbp2        | 0.482  | 1.543 | 7309 | 6192 | 6580 | 899   | 1364 | 898   |
| NM_025372 | Tipin         | 0.855  | 1.543 | 3140 | 2382 | 2854 | 273   | 332  | 355   |
| NM_029339 | Ccdc101       | 0.752  | 1.540 | 2588 | 1471 | 1372 | 546   | 344  | 317   |
| NM_134050 | Rab15         | -0.806 | 1.540 | 3150 | 676  | 1355 | 2323  | 3578 | 570   |
| NM_027541 | Prpf3         | 0.696  | 1.539 | 2132 | 2287 | 2012 | 419   | 449  | 268   |
| NM_178700 | Grsf1         | 0.875  | 1.538 | 4920 | 3769 | 3515 | 542   | 311  | 173   |
| NM_029920 | C130038G02Rik | -0.039 | 1.535 | 7963 | 2629 | 4112 | 14384 | 9169 | 12853 |

|              |               |        |       |       |       |       |       |       |       |
|--------------|---------------|--------|-------|-------|-------|-------|-------|-------|-------|
| NM_028288    | Cul4b         | -0.292 | 1.535 | 3695  | 3642  | 3241  | 237   | 527   | 488   |
| NM_138676    | Shkbp1        | 0.422  | 1.534 | 1847  | 2628  | 1523  | 270   | 318   | 71    |
| NM_172561    | Spag7         | -0.118 | 1.533 | 5175  | 4106  | 4406  | 224   | 152   | 101   |
| NM_026591    | Mrpl24        | 0.757  | 1.529 | 1381  | 2755  | 1082  | 66    | 89    | 42    |
| NM_011830    | Impdh2        | 0.355  | 1.529 | 2116  | 1618  | 1477  | 107   | 104   | 139   |
| NM_178143    | Prkaa2        | 0.207  | 1.527 | 3551  | 3554  | 1942  | 1924  | 2163  | 2712  |
| NM_008847    | Pip5k1a       | 0.968  | 1.526 | 4557  | 5423  | 2900  | 680   | 689   | 462   |
| NM_144829    | Aarsd1        | -0.073 | 1.526 | 3478  | 2087  | 2602  | 360   | 252   | 305   |
| NM_009272    | Srm           | 0.434  | 1.525 | 4254  | 3957  | 4037  | 104   | 115   | 40    |
| NM_010760    | Magoh         | 0.853  | 1.523 | 2896  | 3529  | 1792  | 182   | 205   | 109   |
| NM_008612    | Mnat1         | 0.949  | 1.522 | 2370  | 3689  | 2450  | 3071  | 3140  | 2506  |
| NM_011405    | Slc7a7        | -0.667 | 1.519 | 2126  | 680   | 2299  | 909   | 1565  | 1057  |
| NM_178069    | Lsg1          | -0.075 | 1.518 | 2915  | 3427  | 3040  | 543   | 567   | 699   |
| NM_027162    | Mif4gd        | -0.225 | 1.517 | 2916  | 1829  | 2128  | 266   | 161   | 80    |
| NM_008449    | Kif5c         | 0.549  | 1.516 | 3594  | 2038  | 2806  | 4904  | 5816  | 10420 |
| NM_011275    | Rnaseh1       | 0.386  | 1.516 | 3373  | 2976  | 2186  | 137   | 126   | 143   |
| NM_027872    | Slc46a3       | -0.794 | 1.515 | 1413  | 1207  | 1802  | 455   | 596   | 285   |
| NM_007999    | Fen1          | 0.625  | 1.515 | 4601  | 3259  | 3720  | 101   | 183   | 95    |
| NM_025553    | Mrpl11        | -0.090 | 1.514 | 2987  | 1830  | 2054  | 54    | 140   | 56    |
| NM_133934    | Isy1          | 0.877  | 1.512 | 2984  | 4216  | 3018  | 352   | 525   | 259   |
| NM_134022    | 6330403K07Rik | -0.137 | 1.503 | 374   | 39    | 69    | 284   | 62    | 178   |
| NM_027432    | Wdr77         | 0.047  | 1.502 | 4932  | 4367  | 3392  | 145   | 374   | 122   |
| NM_019537    | Dscr2         | -0.263 | 1.498 | 3053  | 2730  | 3144  | 169   | 434   | 373   |
| NM_001080390 | Mark2         | 0.427  | 1.497 | 608   | 189   | 302   | 690   | 533   | 501   |
| NM_177619    | Myst2         | 0.630  | 1.496 | 7490  | 5501  | 5315  | 874   | 805   | 696   |
| NM_183392    | Nup54         | 0.950  | 1.493 | 3056  | 3796  | 2339  | 354   | 488   | 249   |
| NM_153544    | BC030867      | 0.711  | 1.493 | 3478  | 1661  | 2056  | 766   | 669   | 432   |
| NM_138681    | Bcas3         | 0.370  | 1.491 | 6617  | 6689  | 6207  | 18026 | 16081 | 20257 |
| NM_080848    | Wdr5          | 0.125  | 1.488 | 22700 | 20106 | 26691 | 13718 | 12241 | 10606 |

|              |               |        |       |       |       |       |      |      |      |
|--------------|---------------|--------|-------|-------|-------|-------|------|------|------|
| NM_008432    | Kcnu1         | 0.203  | 1.485 | 885   | 373   | 370   | 2695 | 3955 | 2158 |
| NM_008956    | Ptbp1         | 0.680  | 1.485 | 9828  | 9603  | 11321 | 418  | 311  | 294  |
| NM_172993    | Zfp512        | 0.681  | 1.485 | 557   | 1362  | 637   | 497  | 559  | 271  |
| NM_011592    | Timm44        | 0.701  | 1.483 | 2435  | 3182  | 1948  | 357  | 642  | 310  |
| NM_020047    | Tacstd2       | -0.091 | 1.482 | 1610  | 41    | 121   | 1604 | 1448 | 1188 |
| NM_011674    | Ugt8a         | 0.475  | 1.481 | 2755  | 888   | 595   | 1989 | 2271 | 2519 |
| NM_134010    | Nup107        | 0.582  | 1.477 | 3963  | 4337  | 3357  | 811  | 908  | 945  |
| NM_025876    | Cdk5rap1      | 0.135  | 1.476 | 3690  | 2195  | 3095  | 478  | 651  | 684  |
| NM_008628    | Msh2          | 0.541  | 1.476 | 5341  | 3495  | 3597  | 826  | 1501 | 1130 |
| NM_001005507 | Smg7          | 0.409  | 1.474 | 6683  | 4001  | 5347  | 1108 | 1401 | 1908 |
| NM_027171    | 2310057J16Rik | -0.131 | 1.471 | 5309  | 174   | 974   | 415  | 1676 | 893  |
| NM_028041    | Ddx54         | 0.722  | 1.470 | 5624  | 3597  | 2808  | 281  | 455  | 210  |
| NM_011151    | Ppm1b         | 0.998  | 1.469 | 5074  | 6078  | 4972  | 651  | 1265 | 1408 |
| NM_010722    | Lmnb2         | 0.682  | 1.468 | 4441  | 3301  | 3861  | 656  | 541  | 318  |
| NM_001038010 | Kat2a         | 0.220  | 1.463 | 2519  | 1626  | 2229  | 307  | 250  | 160  |
| NM_029365    | Med25         | 0.568  | 1.462 | 3772  | 2721  | 2565  | 332  | 330  | 187  |
| NM_177672    | AV028368      | 0.665  | 1.461 | 3465  | 2908  | 2745  | 605  | 255  | 112  |
| NM_173396    | Tgif2         | 0.380  | 1.456 | 6249  | 2860  | 3461  | 347  | 375  | 419  |
| NM_022721    | Fzd5          | -1.516 | 1.455 | 12430 | 3666  | 5822  | 366  | 262  | 161  |
| NM_027256    | Ints4         | 0.922  | 1.452 | 2642  | 1940  | 1855  | 717  | 1139 | 737  |
| NM_016905    | Galk1         | 0.025  | 1.451 | 1675  | 2504  | 2642  | 239  | 352  | 151  |
| NM_028597    | Thoc3         | 0.159  | 1.451 | 4306  | 2683  | 3986  | 162  | 268  | 192  |
| NM_030703    | Cpn1          | -0.028 | 1.451 | 746   | 286   | 414   | 1915 | 3013 | 2678 |
| NM_001080387 | Fusip1        | 0.791  | 1.450 | 4878  | 4932  | 3083  | 119  | 153  | 135  |
| NM_031391    | Gtf2a1        | 0.761  | 1.449 | 3485  | 4136  | 2406  | 586  | 904  | 462  |
| NM_173755    | Ube2o         | -0.321 | 1.445 | 3893  | 3001  | 3870  | 1601 | 1104 | 887  |
| NM_023565    | Cse1l         | 0.743  | 1.444 | 5192  | 3495  | 4172  | 664  | 676  | 704  |
| NM_054078    | Baz2a         | 0.562  | 1.440 | 6452  | 12488 | 9237  | 738  | 1380 | 766  |
| NM_144851    | Senp1         | 0.578  | 1.439 | 4003  | 4121  | 4921  | 1234 | 1391 | 1488 |

|              |               |        |       |       |      |       |      |      |      |
|--------------|---------------|--------|-------|-------|------|-------|------|------|------|
| NM_198671    | Gse1          | -0.160 | 1.439 | 13543 | 8593 | 12219 | 5430 | 2128 | 1954 |
| NM_007892    | E2f5          | 0.864  | 1.435 | 2871  | 3165 | 2027  | 561  | 278  | 208  |
| NM_028053    | Tmem38b       | 0.164  | 1.435 | 3144  | 2591 | 1825  | 484  | 783  | 427  |
| NM_172284    | Ddx19b        | 0.303  | 1.432 | 2997  | 2397 | 3120  | 245  | 311  | 386  |
| NM_199056    | Ippk          | -0.036 | 1.432 | 5133  | 4267 | 6523  | 1044 | 1037 | 1228 |
| NM_175414    | 9430079M16Rik | 0.028  | 1.432 | 7409  | 9764 | 7161  | 6043 | 9203 | 4042 |
| NM_030251    | Abtb1         | -0.066 | 1.430 | 4770  | 4639 | 4744  | 250  | 396  | 192  |
| NM_145404    | Prmt7         | 0.260  | 1.430 | 6749  | 4031 | 6674  | 725  | 739  | 1164 |
| NM_133884    | Gpn2          | 0.754  | 1.429 | 4743  | 4061 | 2958  | 205  | 209  | 77   |
| NM_146000    | Bud13         | -0.049 | 1.424 | 2881  | 2647 | 3126  | 214  | 204  | 334  |
| NM_013560    | Hspb1         | -2.297 | 1.424 | 2074  | 515  | 1840  | 54   | 54   | 45   |
| NM_026824    | Dus1l         | 0.102  | 1.423 | 4737  | 3432 | 4819  | 309  | 78   | 121  |
| NM_023178    | Dmap1         | 0.907  | 1.421 | 3511  | 2762 | 2227  | 149  | 108  | 129  |
| NM_138756    | Slc25a36      | -0.407 | 1.420 | 4107  | 4254 | 3469  | 364  | 704  | 874  |
| NM_019406    | Fnbp1         | 0.002  | 1.419 | 6000  | 3772 | 6520  | 2162 | 2304 | 1845 |
| NM_212450    | Ctdspl2       | 0.348  | 1.419 | 5823  | 4690 | 4399  | 656  | 956  | 802  |
| NM_026894    | 1500001M20Rik | 0.848  | 1.418 | 3323  | 3588 | 2683  | 657  | 1235 | 691  |
| NM_011178    | Prtn3         | -0.747 | 1.416 | 498   | 26   | 93    | 467  | 170  | 152  |
| NM_008946    | Psmb6         | -0.233 | 1.414 | 1223  | 1828 | 1671  | 93   | 91   | 73   |
| NM_153416    | Aaas          | 0.337  | 1.413 | 3042  | 2680 | 2889  | 270  | 534  | 286  |
| NM_027667    | Arhgap19      | 0.362  | 1.412 | 3504  | 2939 | 2695  | 546  | 988  | 1913 |
| NM_027423    | Polr3b        | 0.817  | 1.409 | 3418  | 4564 | 3416  | 2831 | 2933 | 2774 |
| NM_025923    | Fancl         | 0.372  | 1.407 | 1820  | 1752 | 1465  | 1804 | 1697 | 1879 |
| NM_001024954 | Pbx4          | 0.396  | 1.407 | 2473  | 1091 | 1465  | 1024 | 808  | 1057 |
| NM_016899    | Rab25         | -0.049 | 1.406 | 143   | 70   | 43    | 184  | 134  | 147  |
| NM_016710    | Nsbp1         | 0.758  | 1.406 | 978   | 1950 | 1331  | 92   | 177  | 97   |
| NM_019805    | Anapc7        | 0.872  | 1.405 | 4520  | 3119 | 2925  | 324  | 516  | 139  |
| NM_026856    | Zfp644        | 0.973  | 1.403 | 4795  | 4794 | 3189  | 1344 | 1896 | 1146 |
| NM_001081293 | Rprd2         | 0.633  | 1.403 | 6322  | 5582 | 3796  | 987  | 901  | 706  |

|              |               |        |       |      |      |      |      |      |      |
|--------------|---------------|--------|-------|------|------|------|------|------|------|
| NM_001033314 | C530028I08Rik | 0.715  | 1.401 | 2743 | 2417 | 1727 | 715  | 214  | 242  |
| NM_018877    | Setdb1        | 0.600  | 1.397 | 1092 | 981  | 911  | 493  | 644  | 383  |
| NM_029546    | Pwp2          | 0.259  | 1.395 | 4489 | 2197 | 3984 | 392  | 337  | 281  |
| NM_030096    | Ddx52         | 0.585  | 1.394 | 2118 | 2799 | 2582 | 593  | 656  | 535  |
| NM_007706    | Socs2         | -0.946 | 1.393 | 8352 | 7971 | 7784 | 416  | 485  | 161  |
| NM_024221    | Pdhb          | 0.047  | 1.393 | 3483 | 3075 | 3445 | 116  | 23   | 159  |
| NM_175439    | Mars2         | 0.694  | 1.391 | 4078 | 4754 | 5372 | 136  | 57   | 26   |
| NM_198019    | Cep78         | 0.935  | 1.391 | 3550 | 3089 | 3100 | 528  | 605  | 523  |
| NM_020035    | Pigo          | 0.412  | 1.389 | 1977 | 924  | 646  | 186  | 245  | 84   |
| NM_021315    | Noc3l         | 0.796  | 1.389 | 3600 | 3736 | 4116 | 686  | 858  | 685  |
| NM_007949    | Erc2          | 0.214  | 1.387 | 2858 | 2237 | 2545 | 492  | 312  | 159  |
| NM_027213    | Med6          | 0.426  | 1.381 | 1173 | 2705 | 1148 | 237  | 375  | 292  |
| NM_001013378 | Usp1          | 0.179  | 1.381 | 4552 | 5369 | 4803 | 614  | 589  | 798  |
| NM_024177    | Mrpl38        | 0.397  | 1.380 | 4026 | 2731 | 3061 | 388  | 179  | 141  |
| NM_145975    | Ddx46         | 0.880  | 1.379 | 4736 | 3076 | 3610 | 870  | 1683 | 1192 |
| NM_009767    | Chic1         | 0.745  | 1.374 | 2158 | 2747 | 2142 | 251  | 409  | 259  |
| NM_145480    | Rfc4          | 0.818  | 1.374 | 3788 | 2417 | 2890 | 272  | 349  | 416  |
| NM_007438    | Aldoa         | 0.986  | 1.373 | 4564 | 5621 | 4493 | 95   | 125  | 75   |
| NM_028036    | Tmco6         | -0.416 | 1.372 | 1359 | 1526 | 1970 | 144  | 246  | 137  |
| NM_001035123 | Setd6         | 0.361  | 1.370 | 4764 | 2273 | 3447 | 115  | 78   | 104  |
| NM_013415    | Atp1b2        | -0.358 | 1.369 | 3206 | 667  | 1487 | 1743 | 1204 | 1076 |
| NM_020570    | Xrcc2         | 0.881  | 1.369 | 2544 | 2383 | 1692 | 298  | 383  | 188  |
| NM_016681    | Chek2         | 0.614  | 1.369 | 4456 | 3471 | 2334 | 599  | 670  | 266  |
| NM_008947    | Psmc1         | 0.763  | 1.368 | 412  | 348  | 357  | 252  | 417  | 165  |
| NM_001005509 | Eif2a         | 0.887  | 1.365 | 3881 | 3782 | 2590 | 469  | 492  | 430  |
| NM_133761    | Dcp1a         | 0.267  | 1.360 | 3867 | 4307 | 4127 | 1045 | 1066 | 1459 |
| NM_001033352 | Klhl21        | 0.333  | 1.359 | 9238 | 8209 | 6607 | 461  | 253  | 58   |
| NM_027485    | Med26         | -0.296 | 1.358 | 6405 | 5892 | 7965 | 1123 | 1063 | 1041 |
| NM_133702    | Nol11         | 0.253  | 1.358 | 4673 | 2895 | 3754 | 440  | 389  | 566  |

|              |               |        |       |       |      |       |      |      |      |
|--------------|---------------|--------|-------|-------|------|-------|------|------|------|
| NM_197988    | 1190005I06Rik | 0.109  | 1.358 | 2018  | 624  | 1783  | 1252 | 1009 | 654  |
| NM_019795    | Dnajc7        | 0.465  | 1.356 | 7799  | 6392 | 7440  | 921  | 1173 | 973  |
| NM_023671    | Clns1a        | 0.529  | 1.355 | 3498  | 2544 | 2586  | 185  | 352  | 162  |
| NM_172598    | Wdhd1         | 0.881  | 1.355 | 3951  | 4580 | 4526  | 603  | 1037 | 878  |
| NM_177870    | Slc5a6        | 0.697  | 1.353 | 2870  | 2594 | 2063  | 519  | 368  | 136  |
| NM_023637    | Sars2         | 0.147  | 1.352 | 3102  | 2242 | 1522  | 273  | 281  | 97   |
| NM_008826    | Pfkl          | 0.099  | 1.351 | 3579  | 3956 | 4397  | 1028 | 955  | 606  |
| NM_010122    | Eif2b4        | 0.387  | 1.351 | 6172  | 5701 | 4944  | 193  | 117  | 28   |
| NM_197940    | Wipf2         | 0.180  | 1.351 | 2741  | 2072 | 2846  | 1301 | 701  | 947  |
| NM_007951    | Erh           | 0.895  | 1.351 | 6531  | 5615 | 4201  | 196  | 288  | 142  |
| NM_027545    | Cwf19l2       | 0.661  | 1.350 | 1656  | 2599 | 1963  | 613  | 895  | 1215 |
| NM_033571    | Fkbp6         | -0.051 | 1.350 | 618   | 502  | 424   | 2322 | 7640 | 5705 |
| NM_023633    | 2410016O06Rik | 0.730  | 1.349 | 5210  | 3412 | 3041  | 402  | 61   | 41   |
| NM_023219    | Slc5a4b       | -0.028 | 1.348 | 525   | 593  | 407   | 2970 | 4002 | 3164 |
| NM_172907    | Olfml1        | -0.174 | 1.347 | 166   | 117  | 92    | 594  | 973  | 396  |
| NM_007707    | Socs3         | -1.803 | 1.346 | 11524 | 8544 | 14073 | 417  | 74   | 94   |
| NM_027911    | Raver1        | 0.537  | 1.345 | 3673  | 2836 | 3984  | 335  | 297  | 330  |
| NM_008260    | Foxa3         | 0.027  | 1.344 | 1885  | 1167 | 1062  | 891  | 1426 | 1059 |
| NM_001081109 | Lmtk2         | -0.144 | 1.343 | 3940  | 2571 | 3476  | 1850 | 1813 | 1822 |
| NM_025392    | Bccip         | 0.619  | 1.341 | 4562  | 3692 | 2874  | 305  | 208  | 167  |
| NM_178645    | Blmh          | -0.212 | 1.341 | 3273  | 3099 | 3680  | 1146 | 1475 | 1054 |
| NM_021886    | Cenph         | 0.625  | 1.340 | 3471  | 2267 | 3140  | 179  | 454  | 375  |
| NM_133984    | Hemk1         | 0.457  | 1.337 | 1792  | 1402 | 2105  | 281  | 146  | 412  |
| NM_025818    | 1200014J11Rik | 0.248  | 1.337 | 3489  | 3656 | 4816  | 671  | 545  | 889  |
| NM_172644    | 5830468K18Rik | 0.058  | 1.336 | 3330  | 4209 | 3770  | 542  | 546  | 781  |
| NM_026277    | Nob1          | 0.464  | 1.334 | 4225  | 2802 | 3133  | 186  | 411  | 247  |
| NM_028814    | 2810403A07Rik | 0.768  | 1.334 | 6092  | 5750 | 3983  | 467  | 609  | 242  |
| NM_009447    | Tuba4a        | 0.333  | 1.333 | 3379  | 3340 | 5415  | 459  | 260  | 240  |
| NM_007989    | Foxh1         | 0.020  | 1.333 | 2244  | 266  | 229   | 156  | 217  | 151  |



|              |               |        |       |       |      |       |      |      |      |
|--------------|---------------|--------|-------|-------|------|-------|------|------|------|
| NM_145823    | Pitpnc1       | -0.404 | 1.331 | 10306 | 7011 | 10081 | 8331 | 9093 | 6292 |
| NM_177298    | 9030221M09Rik | 0.082  | 1.330 | 4389  | 6539 | 4793  | 785  | 815  | 499  |
| NM_010590    | Jub           | -0.067 | 1.329 | 11848 | 9140 | 11223 | 371  | 337  | 183  |
| NM_025573    | Sfrs9         | 0.878  | 1.329 | 4517  | 4936 | 3573  | 235  | 155  | 25   |
| NM_145620    | Rrp9          | 0.431  | 1.329 | 2596  | 3106 | 4278  | 208  | 163  | 184  |
| NM_153585    | Cnot10        | 0.460  | 1.328 | 3754  | 2585 | 3507  | 1027 | 770  | 1127 |
| NM_198609    | BC003885      | 0.228  | 1.328 | 3892  | 2753 | 3492  | 104  | 154  | 130  |
| NM_021882    | Si            | -0.345 | 1.327 | 665   | 792  | 634   | 362  | 834  | 473  |
| NM_007690    | Chd1          | 0.608  | 1.326 | 4793  | 5286 | 5117  | 1100 | 2075 | 1601 |
| NM_172713    | Sdad1         | 0.990  | 1.325 | 3807  | 4163 | 2970  | 456  | 649  | 290  |
| NM_009095    | Rps5          | 0.013  | 1.325 | 4703  | 4846 | 3069  | 208  | 144  | 85   |
| NM_001081107 | Hel308        | 0.623  | 1.322 | 3990  | 3841 | 2752  | 790  | 732  | 483  |
| NM_009319    | Tarbp2        | 0.445  | 1.322 | 4064  | 4420 | 4267  | 173  | 260  | 155  |
| NM_145890    | Grhl1         | -0.126 | 1.320 | 426   | 458  | 397   | 1038 | 1263 | 505  |
| NM_009085    | Polr1c        | 0.246  | 1.318 | 6428  | 6680 | 6308  | 124  | 74   | 117  |
| NM_144918    | Smyd5         | 0.350  | 1.317 | 3674  | 4399 | 3281  | 288  | 496  | 429  |
| NM_022811    | Polr1e        | 0.502  | 1.316 | 2878  | 2482 | 2464  | 384  | 518  | 159  |
| NM_010709    | Lgtn          | 0.161  | 1.316 | 2567  | 1955 | 2127  | 400  | 446  | 450  |
| NM_010882    | Ndn           | -2.191 | 1.314 | 1889  | 23   | 458   | 431  | 47   | 60   |
| NM_172705    | Phf13         | 0.093  | 1.313 | 5900  | 6258 | 4305  | 544  | 240  | 97   |
| NM_178763    | Zfp750        | 0.078  | 1.313 | 757   | 54   | 105   | 405  | 419  | 272  |
| NM_001037741 | Gpx4          | 0.041  | 1.311 | 6361  | 4918 | 3993  | 171  | 76   | 60   |
| NM_201230    | Fgfr1op       | 0.659  | 1.311 | 237   | 451  | 437   | 400  | 814  | 714  |
| NM_177305    | Arl4c         | 0.675  | 1.311 | 7359  | 9691 | 10499 | 767  | 138  | 105  |
| NM_201637    | Chd8          | 0.034  | 1.307 | 619   | 857  | 828   | 706  | 873  | 1045 |
| NM_019870    | Ard1a         | 0.790  | 1.306 | 2901  | 1621 | 1677  | 85   | 139  | 67   |
| NM_029360    | Tm4sf5        | 0.135  | 1.305 | 169   | 33   | 83    | 418  | 662  | 371  |
| NM_025546    | Rsl1d1        | 0.526  | 1.305 | 5414  | 5903 | 5204  | 324  | 322  | 365  |
| NM_027184    | Ipmk          | -0.265 | 1.305 | 5654  | 4067 | 5524  | 844  | 1045 | 790  |

|              |               |        |       |       |      |      |      |      |      |
|--------------|---------------|--------|-------|-------|------|------|------|------|------|
| NM_001024922 | Ddx49         | -0.419 | 1.305 | 4417  | 4349 | 4943 | 285  | 132  | 233  |
| NM_025686    | Brf2          | 0.260  | 1.304 | 2753  | 2380 | 1599 | 112  | 98   | 41   |
| NM_138630    | Arhgap4       | 0.193  | 1.304 | 327   | 111  | 66   | 312  | 322  | 214  |
| NM_001033548 | 6030429G01Rik | -0.499 | 1.303 | 827   | 1353 | 1776 | 467  | 266  | 165  |
| NM_176848    | Fbxo2         | -1.481 | 1.302 | 2399  | 1464 | 1401 | 1661 | 2179 | 1335 |
| NM_177777    | D11Wsu47e     | -0.278 | 1.302 | 6144  | 4146 | 5033 | 208  | 112  | 249  |
| NM_009801    | Car2          | 0.010  | 1.302 | 3216  | 323  | 1383 | 1087 | 466  | 252  |
| NM_145447    | Mfsd7c        | -0.378 | 1.300 | 2021  | 1128 | 1061 | 2744 | 4747 | 1368 |
| NM_019716    | Orc6l         | 0.234  | 1.300 | 8861  | 6752 | 8701 | 82   | 52   | 373  |
| NM_145993    | L3mbtl2       | 0.470  | 1.300 | 4224  | 3227 | 3400 | 544  | 901  | 552  |
| NM_145147    | Gtpbp6        | 0.218  | 1.298 | 7831  | 3909 | 3569 | 174  | 170  | 65   |
| NM_030722    | Pum1          | 0.585  | 1.298 | 7653  | 6865 | 3934 | 1847 | 2526 | 1498 |
| NM_024236    | Qdpr          | 0.165  | 1.297 | 1965  | 2489 | 2111 | 522  | 231  | 253  |
| NM_001013391 | Cpsf6         | 0.671  | 1.297 | 5805  | 8711 | 6159 | 422  | 766  | 844  |
| NM_138660    | Casc3         | 0.545  | 1.297 | 3417  | 3636 | 3607 | 436  | 318  | 615  |
| NM_175660    | Hist1h2ab     | 0.123  | 1.296 | 176   | 303  | 270  | 24   | 10   | 29   |
| NM_178029    | Setd1a        | 0.678  | 1.296 | 5200  | 4296 | 3374 | 387  | 454  | 221  |
| NM_022994    | Dap3          | 0.373  | 1.295 | 6723  | 4493 | 4066 | 521  | 715  | 319  |
| NM_133242    | Rnpc2         | 0.012  | 1.294 | 5716  | 8452 | 8291 | 480  | 314  | 683  |
| NM_007533    | Bckdha        | -0.381 | 1.294 | 3620  | 2977 | 1987 | 874  | 1033 | 425  |
| NM_008692    | Nfyc          | 0.595  | 1.293 | 4042  | 5050 | 3546 | 1204 | 1568 | 944  |
| NM_001076789 | Cbx5          | 0.793  | 1.293 | 5564  | 5835 | 4400 | 593  | 1295 | 1383 |
| NM_001079824 | Hnrnph3       | -0.004 | 1.293 | 5784  | 6017 | 5803 | 216  | 203  | 302  |
| NM_008562    | Mcl1          | 0.157  | 1.292 | 10471 | 9825 | 5283 | 136  | 63   | 66   |
| NM_001033446 | Gm949         | 0.071  | 1.291 | 1287  | 232  | 118  | 271  | 538  | 366  |
| NM_020329    | Dolpp1        | -0.358 | 1.289 | 2921  | 2555 | 4201 | 278  | 134  | 198  |
| NM_028908    | 4933403G14Rik | -0.663 | 1.289 | 1987  | 62   | 450  | 454  | 211  | 151  |
| NM_130879    | Usp48         | 0.259  | 1.288 | 9295  | 5824 | 3921 | 1201 | 1426 | 639  |
| NM_011624    | Top3b         | -0.337 | 1.287 | 3928  | 3419 | 3554 | 542  | 695  | 644  |

|              |               |        |       |      |       |      |       |       |       |
|--------------|---------------|--------|-------|------|-------|------|-------|-------|-------|
| NM_007661    | Cdc2l1        | 0.780  | 1.285 | 5353 | 4629  | 3105 | 509   | 429   | 225   |
| NM_011542    | Tcea3         | -1.712 | 1.284 | 2903 | 609   | 2993 | 1644  | 3149  | 609   |
| NM_027294    | Cmtm8         | -0.554 | 1.283 | 2638 | 490   | 1739 | 3173  | 3776  | 2950  |
| NM_031248    | Robld3        | 0.231  | 1.283 | 4484 | 3309  | 2803 | 179   | 130   | 41    |
| NM_144824    | BC021790      | 0.278  | 1.282 | 5358 | 4204  | 4056 | 553   | 637   | 497   |
| NM_023731    | Ccdc86        | 0.224  | 1.282 | 3723 | 3647  | 4912 | 285   | 238   | 184   |
| NM_010655    | Kpna2         | 0.461  | 1.281 | 7481 | 5381  | 4418 | 235   | 365   | 227   |
| NM_027204    | Mrpl12        | 0.099  | 1.281 | 6381 | 3199  | 4760 | 126   | 121   | 56    |
| NM_023514    | Mrps9         | 0.572  | 1.280 | 3770 | 2668  | 3496 | 1288  | 1013  | 1498  |
| NM_134012    | Mbtd1         | 0.153  | 1.279 | 5315 | 4525  | 6068 | 1062  | 1520  | 1661  |
| NM_026508    | Trap1         | 0.013  | 1.278 | 4849 | 3857  | 4375 | 650   | 595   | 798   |
| NM_011400    | Slc2a1        | 0.255  | 1.275 | 5719 | 4304  | 3115 | 744   | 586   | 280   |
| NM_020046    | Dhodh         | -0.103 | 1.274 | 2728 | 1972  | 2332 | 295   | 194   | 335   |
| NM_178215    | Hist2h3b      | 0.088  | 1.273 | 416  | 479   | 230  | 16    | 30    | 10    |
| NM_009743    | Bcl2l1        | 0.356  | 1.272 | 4493 | 14458 | 8035 | 928   | 1016  | 960   |
| NM_175138    | Dnaic1        | -0.555 | 1.270 | 2395 | 2265  | 2089 | 4472  | 6031  | 2317  |
| NM_144958    | Eif4a1        | 0.435  | 1.270 | 9867 | 5796  | 5872 | 214   | 158   | 98    |
| NM_030697    | Kank3         | -0.841 | 1.268 | 5953 | 2311  | 3396 | 540   | 1093  | 532   |
| NM_080446    | Helb          | -0.136 | 1.266 | 2997 | 3502  | 2819 | 711   | 907   | 815   |
| NM_172745    | Tufm          | 0.631  | 1.266 | 2517 | 1992  | 1885 | 100   | 38    | 73    |
| NM_001017525 | Btbd11        | -0.130 | 1.264 | 1399 | 2121  | 1983 | 2780  | 4146  | 3193  |
| NM_009109    | Ryr1          | 0.007  | 1.264 | 6430 | 1090  | 1587 | 6139  | 9417  | 5405  |
| NM_011589    | Timeless      | 0.655  | 1.264 | 366  | 542   | 880  | 346   | 590   | 414   |
| NM_009606    | Acta1         | -0.111 | 1.262 | 260  | 41    | 190  | 674   | 1129  | 1796  |
| NM_025598    | 2700038C09Rik | 0.076  | 1.261 | 3483 | 2090  | 3114 | 70    | 42    | 26    |
| NM_172813    | Enox1         | 0.949  | 1.260 | 9254 | 5696  | 8311 | 19962 | 15059 | 21057 |
| NM_018749    | Eif3d         | 0.464  | 1.254 | 6337 | 6860  | 6947 | 250   | 373   | 376   |
| NM_009253    | Serpina3m     | 0.202  | 1.254 | 28   | 36    | 10   | 214   | 339   | 78    |
| NM_152822    | Las1l         | 0.620  | 1.254 | 2061 | 2099  | 2362 | 213   | 434   | 226   |

|              |               |        |       |      |      |      |      |       |       |
|--------------|---------------|--------|-------|------|------|------|------|-------|-------|
| NM_027288    | Manba         | -0.725 | 1.254 | 6713 | 3378 | 3016 | 1400 | 1795  | 805   |
| NM_020486    | Bcam          | 0.095  | 1.252 | 2005 | 202  | 513  | 388  | 1253  | 187   |
| NM_173453    | Tmem11        | 0.436  | 1.251 | 7130 | 5902 | 6185 | 449  | 409   | 301   |
| NM_144543    | Thyn1         | 0.576  | 1.251 | 3402 | 3816 | 4397 | 150  | 60    | 69    |
| NM_027678    | Zranb3        | 0.451  | 1.250 | 3966 | 3220 | 3240 | 3395 | 3852  | 3959  |
| NM_007383    | Acads         | 0.075  | 1.248 | 2659 | 2173 | 1833 | 183  | 222   | 145   |
| NM_145123    | Crtac1        | -0.135 | 1.243 | 4949 | 1674 | 1763 | 9618 | 13544 | 12105 |
| NM_020580    | Th1l          | 0.501  | 1.243 | 2660 | 2018 | 2532 | 322  | 296   | 229   |
| NM_001045531 | Spata22       | -0.107 | 1.241 | 138  | 120  | 199  | 1151 | 462   | 1374  |
| NM_198005    | 4833418A01Rik | -0.157 | 1.239 | 3678 | 3063 | 3617 | 487  | 345   | 579   |
| NM_145610    | Ppan          | 0.048  | 1.238 | 5820 | 3729 | 4239 | 171  | 75    | 94    |
| NM_134109    | Ildr1         | 0.040  | 1.237 | 4289 | 272  | 307  | 1332 | 1253  | 1387  |
| NM_007926    | Scye1         | 0.537  | 1.233 | 4590 | 5314 | 3235 | 249  | 600   | 196   |
| NM_016959    | Rps3a         | -0.307 | 1.227 | 6892 | 5228 | 3628 | 91   | 185   | 74    |
| NM_008787    | Pcnt          | 0.509  | 1.226 | 5140 | 3195 | 3597 | 2052 | 2370  | 1886  |
| NM_011750    | Sf1           | 0.322  | 1.225 | 6643 | 5279 | 5591 | 469  | 548   | 385   |
| NM_009634    | Adsl          | 0.658  | 1.223 | 3808 | 3704 | 3617 | 377  | 416   | 367   |
| NM_178379    | Cox10         | 0.782  | 1.223 | 5354 | 4901 | 5127 | 3440 | 3185  | 3378  |
| NM_008033    | Fnta          | 0.713  | 1.223 | 2283 | 2339 | 1894 | 283  | 254   | 169   |
| NM_134087    | AA409316      | 0.022  | 1.220 | 5787 | 3657 | 4959 | 1490 | 1104  | 740   |
| NM_001034059 | 6330534C20Rik | 0.039  | 1.220 | 292  | 93   | 97   | 114  | 196   | 356   |
| NM_199466    | Eml4          | 0.283  | 1.219 | 4401 | 5286 | 4358 | 2231 | 3447  | 3526  |
| NM_009359    | Tex9          | 0.782  | 1.217 | 2655 | 2202 | 2260 | 482  | 507   | 770   |
| NM_018810    | Mkrn1         | 0.248  | 1.216 | 9031 | 6075 | 5343 | 347  | 735   | 371   |
| NM_016723    | Uchl3         | 0.309  | 1.216 | 3093 | 2080 | 3516 | 795  | 876   | 1561  |
| NM_011568    | Thoc4         | 0.657  | 1.216 | 5374 | 4107 | 4284 | 189  | 245   | 58    |
| NM_031877    | Wasf1         | 0.675  | 1.212 | 5354 | 5142 | 6056 | 1199 | 1277  | 1899  |
| NM_007382    | Acadm         | 0.196  | 1.212 | 2761 | 3005 | 2302 | 186  | 270   | 243   |
| NM_026411    | 1700021F05Rik | 0.154  | 1.212 | 2991 | 3132 | 3284 | 470  | 512   | 430   |

|           |               |        |       |      |      |      |      |      |      |
|-----------|---------------|--------|-------|------|------|------|------|------|------|
| NM_030178 | Brpf1         | 0.871  | 1.211 | 5098 | 5939 | 5492 | 324  | 637  | 379  |
| NM_011972 | Poli          | 0.018  | 1.211 | 1671 | 2658 | 2436 | 258  | 394  | 531  |
| NM_177342 | Taf5          | 0.539  | 1.208 | 2821 | 3105 | 3160 | 190  | 369  | 474  |
| NM_175112 | Rae1          | 0.302  | 1.208 | 3636 | 3258 | 4135 | 281  | 475  | 265  |
| NM_177266 | A930009M04Rik | -0.082 | 1.207 | 4277 | 2872 | 3502 | 644  | 666  | 950  |
| NM_026034 | Armc10        | 0.882  | 1.207 | 2084 | 2878 | 1767 | 232  | 323  | 132  |
| NM_177474 | D19Bwg1357e   | 0.397  | 1.207 | 4417 | 5435 | 4896 | 713  | 704  | 1080 |
| NM_133664 | Lad1          | -0.021 | 1.203 | 1882 | 201  | 452  | 2454 | 3621 | 3437 |
| NM_016737 | Stip1         | 0.016  | 1.201 | 4095 | 3826 | 4088 | 343  | 401  | 316  |
| NM_010124 | Eif4ebp2      | -0.148 | 1.201 | 5582 | 4344 | 4889 | 462  | 641  | 435  |
| NM_011900 | Mpdu1         | -0.179 | 1.200 | 3133 | 1259 | 1644 | 254  | 146  | 121  |
| NM_146173 | Tspan33       | 0.072  | 1.199 | 2124 | 582  | 848  | 1714 | 6037 | 3072 |
| NM_144820 | Ccdc28a       | 0.191  | 1.198 | 3550 | 2009 | 2295 | 476  | 437  | 476  |
| NM_145995 | 2700050L05Rik | 0.436  | 1.196 | 98   | 194  | 125  | 327  | 384  | 208  |
| NM_172122 | Crocc         | 0.710  | 1.193 | 2629 | 446  | 228  | 1050 | 1065 | 451  |
| NM_026071 | Slc25a19      | 0.225  | 1.193 | 3673 | 2268 | 2786 | 393  | 468  | 273  |
| NM_022988 | Nif3l1        | 0.153  | 1.192 | 225  | 650  | 550  | 363  | 328  | 405  |
| NM_025663 | Gpatch4       | 0.649  | 1.191 | 2938 | 2166 | 1765 | 270  | 244  | 104  |
| NM_016884 | Hnrnpc        | 0.890  | 1.191 | 4394 | 5242 | 3532 | 535  | 490  | 681  |
| NM_080469 | Prnpi1        | 0.314  | 1.189 | 2902 | 4128 | 2939 | 2792 | 2702 | 1452 |
| NM_175238 | Rif1          | 0.504  | 1.188 | 5302 | 2779 | 3281 | 708  | 698  | 1360 |
| NM_080289 | Grhpr         | 0.331  | 1.188 | 2762 | 2224 | 2030 | 277  | 240  | 104  |
| NM_026167 | Klhl13        | -0.128 | 1.185 | 2514 | 1444 | 2052 | 952  | 1806 | 2102 |
| NM_198029 | Fermt1        | -0.115 | 1.184 | 1053 | 197  | 420  | 2600 | 2615 | 2922 |
| NM_021556 | Mrps30        | 0.327  | 1.184 | 4278 | 4433 | 4870 | 120  | 205  | 205  |
| NM_198631 | BC057627      | 0.631  | 1.183 | 5652 | 8209 | 5060 | 810  | 499  | 405  |
| NM_026816 | Gtf2f2        | -0.235 | 1.183 | 3045 | 4132 | 4509 | 2513 | 1862 | 2973 |
| NM_145506 | Epb4.1l5      | 0.314  | 1.183 | 4288 | 3478 | 3573 | 2680 | 2445 | 4239 |
| NM_016680 | Sfrs16        | 0.214  | 1.183 | 3993 | 2950 | 2794 | 786  | 939  | 357  |

|              |               |        |       |      |      |      |      |      |      |
|--------------|---------------|--------|-------|------|------|------|------|------|------|
| NM_010472    | Agfg1         | 0.619  | 1.181 | 4786 | 4243 | 4699 | 1027 | 1313 | 1605 |
| NM_019990    | Stard10       | -0.130 | 1.181 | 2723 | 1160 | 1183 | 2246 | 1166 | 506  |
| NM_025572    | 2610528J11Rik | 0.125  | 1.181 | 166  | 43   | 34   | 154  | 181  | 87   |
| NM_172469    | Clic6         | -0.146 | 1.181 | 1525 | 417  | 800  | 3036 | 4953 | 4447 |
| NM_153505    | Nckap1l       | 0.578  | 1.179 | 296  | 576  | 358  | 2529 | 1861 | 2994 |
| NM_011916    | Xrn1          | 0.350  | 1.179 | 4357 | 4371 | 5070 | 1507 | 1724 | 2238 |
| NM_008799    | Pdcd2         | 0.419  | 1.179 | 3482 | 4563 | 4083 | 156  | 238  | 245  |
| NM_019976    | Psrc1         | 0.083  | 1.179 | 4708 | 3085 | 2548 | 152  | 312  | 30   |
| NM_172662    | Gtdc1         | 0.728  | 1.178 | 936  | 1469 | 1803 | 5820 | 4181 | 8348 |
| NM_011945    | Map3k1        | 0.072  | 1.178 | 6134 | 5150 | 6274 | 2369 | 1923 | 1420 |
| NM_133835    | Ubac1         | -0.098 | 1.178 | 2846 | 2067 | 3483 | 480  | 466  | 545  |
| NM_026393    | Nmral1        | 0.569  | 1.177 | 1513 | 1591 | 1276 | 193  | 104  | 197  |
| NM_007705    | Cirbp         | 0.730  | 1.177 | 2774 | 3054 | 2374 | 124  | 175  | 100  |
| NM_023202    | Ndufa7        | 0.265  | 1.176 | 4023 | 4471 | 2782 | 160  | 457  | 334  |
| NM_024240    | Gins4         | 0.567  | 1.176 | 2955 | 2088 | 2039 | 179  | 210  | 117  |
| NM_009478    | Urod          | 0.526  | 1.176 | 2470 | 2699 | 2175 | 199  | 194  | 54   |
| NM_023479    | Elac2         | 0.389  | 1.175 | 3492 | 3247 | 3688 | 528  | 587  | 578  |
| NM_008586    | Mep1b         | -0.055 | 1.175 | 258  | 285  | 217  | 584  | 1204 | 1633 |
| NM_153775    | 2310061F22Rik | 0.284  | 1.175 | 4281 | 3835 | 5798 | 208  | 205  | 98   |
| NM_028273    | Pgam5         | 0.995  | 1.174 | 4725 | 4043 | 3026 | 194  | 242  | 93   |
| NM_183020    | Atxn2l        | 0.345  | 1.174 | 6901 | 5853 | 4636 | 317  | 269  | 209  |
| NM_029557    | Tsen54        | -0.271 | 1.173 | 4315 | 2698 | 4861 | 380  | 292  | 75   |
| NM_023130    | Raly          | 0.010  | 1.173 | 4914 | 5662 | 6325 | 1143 | 1313 | 1614 |
| NM_177700    | Atmin         | -0.157 | 1.171 | 4744 | 2819 | 3980 | 303  | 236  | 336  |
| NM_172410    | Nup93         | -0.025 | 1.171 | 3058 | 3212 | 4968 | 1594 | 1758 | 2251 |
| NM_001077264 | Ap2a1         | 0.326  | 1.171 | 4242 | 3128 | 2276 | 718  | 728  | 305  |
| NM_198102    | Tra2a         | 0.786  | 1.171 | 6650 | 8336 | 5552 | 237  | 351  | 331  |
| NM_020579    | B4galt3       | -0.064 | 1.169 | 3019 | 2747 | 3523 | 271  | 103  | 274  |
| NM_054048    | Rcor2         | 0.316  | 1.168 | 3711 | 2141 | 1726 | 143  | 187  | 133  |

|              |               |        |       |      |      |      |      |      |      |
|--------------|---------------|--------|-------|------|------|------|------|------|------|
| NM_198613    | Ap2s1         | 0.147  | 1.167 | 1529 | 2386 | 1830 | 318  | 122  | 95   |
| NM_010588    | Jag2          | -0.205 | 1.167 | 5358 | 493  | 830  | 2314 | 3182 | 1803 |
| NM_009709    | Arnt          | 0.690  | 1.166 | 3592 | 3872 | 2463 | 722  | 1077 | 734  |
| NM_016776    | Mybbp1a       | 0.720  | 1.163 | 5045 | 3158 | 4023 | 383  | 257  | 259  |
| NM_025380    | Eef1e1        | 0.654  | 1.162 | 4078 | 3175 | 3255 | 269  | 302  | 403  |
| NM_133185    | Rogdi         | -0.260 | 1.161 | 2161 | 1255 | 2027 | 212  | 140  | 163  |
| NM_001013765 | Zscan4c       | 0.210  | 1.160 | 20   | 10   | 10   | 18   | 10   | 10   |
| NM_009384    | Tiam1         | -0.824 | 1.160 | 3238 | 2173 | 3650 | 7674 | 4624 | 5881 |
| NM_011081    | Piga          | 0.576  | 1.160 | 1639 | 1280 | 1617 | 198  | 365  | 199  |
| NM_025463    | 1810009A15Rik | -0.006 | 1.157 | 3049 | 2916 | 2795 | 58   | 68   | 45   |
| NM_025407    | Uqcrc1        | 0.127  | 1.157 | 5422 | 3488 | 4293 | 264  | 242  | 264  |
| NM_001039385 | Vgf           | -0.202 | 1.157 | 2337 | 912  | 1196 | 1168 | 1507 | 636  |
| NM_024199    | Cstf1         | 0.476  | 1.153 | 5479 | 5012 | 5282 | 221  | 257  | 271  |
| NM_020491    | Sssca1        | 0.237  | 1.153 | 2650 | 2110 | 2517 | 37   | 116  | 36   |
| NM_001004366 | Scube3        | 0.057  | 1.150 | 3434 | 976  | 945  | 2854 | 8153 | 5556 |
| NM_001014974 | Ttll4         | 0.433  | 1.149 | 3035 | 2914 | 3522 | 707  | 823  | 944  |
| NM_001042675 | Rbpms         | -1.561 | 1.149 | 7659 | 4416 | 4887 | 2425 | 4562 | 1196 |
| NM_178576    | Cpsf4         | 0.574  | 1.149 | 4917 | 5024 | 5254 | 349  | 326  | 239  |
| NM_007880    | Arid3a        | -0.131 | 1.148 | 5087 | 7213 | 7578 | 1455 | 1015 | 660  |
| NM_134139    | Wdr74         | 0.220  | 1.147 | 3853 | 2404 | 3096 | 164  | 75   | 127  |
| NM_027644    | 4931440B09Rik | 0.073  | 1.145 | 889  | 76   | 38   | 323  | 851  | 263  |
| NM_025666    | Ubr7          | 0.428  | 1.145 | 4978 | 5379 | 3819 | 419  | 606  | 167  |
| NM_012003    | Cops7a        | 0.412  | 1.144 | 3956 | 5439 | 4287 | 215  | 276  | 161  |
| NM_172116    | Pddc1         | -0.012 | 1.142 | 2410 | 2673 | 2640 | 149  | 167  | 71   |
| NM_013456    | Actn3         | -0.166 | 1.142 | 2005 | 1342 | 1719 | 1011 | 1976 | 870  |
| NM_133787    | Nmd3          | 0.553  | 1.141 | 5247 | 4864 | 3530 | 272  | 649  | 244  |
| NM_019995    | D3Ert300e     | 0.811  | 1.139 | 2311 | 3238 | 1648 | 275  | 678  | 295  |
| NM_013782    | Ptdss2        | 0.230  | 1.139 | 3597 | 2371 | 2243 | 517  | 578  | 349  |
| NM_025909    | Oma1          | 0.476  | 1.139 | 1634 | 2093 | 1369 | 999  | 1008 | 493  |

|              |               |        |       |      |      |      |      |      |      |
|--------------|---------------|--------|-------|------|------|------|------|------|------|
| NM_025384    | Dnajc15       | 0.032  | 1.139 | 2764 | 1818 | 3042 | 1064 | 966  | 1667 |
| NM_178747    | Gulo          | 0.103  | 1.138 | 404  | 200  | 223  | 1137 | 2011 | 1300 |
| NM_028469    | 3110082I17Rik | 0.317  | 1.136 | 6589 | 5998 | 8761 | 3298 | 2897 | 2299 |
| NM_023197    | 2310008H09Rik | 0.544  | 1.136 | 5782 | 3816 | 3395 | 277  | 205  | 136  |
| NM_025537    | Tsfm          | 0.180  | 1.135 | 2961 | 3117 | 2382 | 273  | 286  | 180  |
| NM_025996    | Tomm34        | -0.121 | 1.133 | 4566 | 3560 | 5070 | 404  | 305  | 308  |
| NM_144871    | Suv420h1      | 0.878  | 1.132 | 4764 | 4686 | 5249 | 1235 | 1120 | 1271 |
| NM_144826    | Utp6          | -0.849 | 1.131 | 4074 | 2705 | 2735 | 799  | 806  | 576  |
| NM_029278    | Nol14         | 0.714  | 1.130 | 4128 | 4712 | 3025 | 523  | 451  | 239  |
| NM_026758    | Mphosph6      | 0.360  | 1.130 | 3549 | 3123 | 3534 | 239  | 294  | 171  |
| NM_001029990 | Mett11d1      | 0.035  | 1.129 | 2745 | 2273 | 3246 | 181  | 176  | 179  |
| NM_026370    | Myst1         | 0.297  | 1.129 | 1824 | 1830 | 1538 | 281  | 328  | 122  |
| NM_016766    | Mcrs1         | 0.144  | 1.128 | 3154 | 2348 | 2416 | 292  | 210  | 287  |
| NM_029456    | Saps3         | 0.188  | 1.128 | 5361 | 5423 | 5446 | 2004 | 2464 | 2900 |
| NM_025348    | Ndufa3        | 0.427  | 1.127 | 2456 | 2098 | 2193 | 54   | 104  | 10   |
| NM_029963    | Mrps5         | 0.067  | 1.127 | 5570 | 3309 | 3689 | 478  | 325  | 297  |
| NM_007444    | Amd2          | 0.337  | 1.126 | 5515 | 5055 | 5469 | 240  | 453  | 193  |
| NM_010774    | Mbd4          | 0.340  | 1.125 | 3041 | 3159 | 3005 | 174  | 298  | 428  |
| NM_008952    | Pipox         | 0.063  | 1.124 | 559  | 141  | 207  | 660  | 1093 | 1713 |
| NM_016748    | Ctps          | 0.825  | 1.123 | 4993 | 5323 | 3940 | 563  | 535  | 322  |
| NM_021500    | Maea          | -0.048 | 1.120 | 4327 | 5366 | 3760 | 747  | 1110 | 540  |
| NM_028003    | Rpap3         | 0.330  | 1.120 | 3428 | 3234 | 4192 | 469  | 1162 | 707  |
| NM_007531    | Phb2          | 0.860  | 1.118 | 6564 | 8206 | 5898 | 136  | 161  | 104  |
| NM_173002    | Zxdc          | 0.904  | 1.118 | 4545 | 9038 | 7809 | 1116 | 1026 | 774  |
| NM_009031    | Rbbp7         | 0.065  | 1.117 | 3022 | 2804 | 2795 | 214  | 100  | 163  |
| NM_026037    | Mboat2        | 0.784  | 1.117 | 5009 | 2959 | 2053 | 3779 | 4749 | 4682 |
| NM_001005525 | Rsrc2         | 0.888  | 1.116 | 3344 | 5935 | 2903 | 359  | 473  | 253  |
| NM_026035    | Mrpl55        | 0.087  | 1.116 | 4452 | 2184 | 3990 | 165  | 214  | 114  |
| NM_178610    | Krr1          | 0.473  | 1.116 | 2867 | 3990 | 3259 | 389  | 356  | 387  |



|              |             |        |       |       |       |       |      |      |      |
|--------------|-------------|--------|-------|-------|-------|-------|------|------|------|
| NM_019869    | Rbm14       | 0.095  | 1.115 | 10076 | 6116  | 6954  | 303  | 360  | 190  |
| NM_145462    | D14Ertd500e | 0.178  | 1.114 | 4128  | 2842  | 3088  | 390  | 240  | 269  |
| NM_026176    | Pdcl        | -0.323 | 1.114 | 2434  | 2609  | 2705  | 135  | 141  | 247  |
| NM_172992    | Phtf2       | 0.586  | 1.113 | 5556  | 5176  | 3202  | 1494 | 2104 | 1706 |
| NM_001017426 | Jmjd3       | 0.288  | 1.112 | 10256 | 9484  | 9414  | 1450 | 577  | 352  |
| NM_019426    | Atf7ip      | 0.792  | 1.111 | 2668  | 7793  | 3250  | 1308 | 2320 | 1931 |
| NM_134059    | Ddx41       | -0.329 | 1.111 | 4207  | 2836  | 4315  | 245  | 112  | 88   |
| NM_008951    | Psmc4       | 0.687  | 1.109 | 2396  | 2722  | 1786  | 157  | 270  | 109  |
| NM_008887    | Phox2a      | -0.074 | 1.106 | 2625  | 62    | 418   | 1569 | 902  | 1064 |
| NM_008281    | Hpn         | -0.092 | 1.105 | 916   | 147   | 148   | 989  | 782  | 292  |
| NM_021451    | Pmaip1      | 0.286  | 1.104 | 4364  | 2061  | 3355  | 1232 | 372  | 256  |
| NM_011752    | Zfp259      | 0.250  | 1.103 | 4818  | 3609  | 5063  | 275  | 196  | 238  |
| NM_008992    | Abcd4       | 0.671  | 1.102 | 2452  | 1970  | 1591  | 559  | 474  | 187  |
| NM_001029876 | Urb2        | -0.323 | 1.101 | 279   | 374   | 597   | 390  | 422  | 824  |
| NM_009372    | Tgif1       | 0.337  | 1.101 | 8747  | 18651 | 10035 | 182  | 232  | 253  |
| NM_026533    | Rps13       | 0.434  | 1.099 | 4685  | 5177  | 2914  | 99   | 93   | 10   |
| NM_181590    | Shq1        | 0.475  | 1.098 | 4480  | 5590  | 4198  | 1969 | 3384 | 2584 |
| NM_025845    | Prpf38b     | 0.530  | 1.096 | 6207  | 6759  | 4984  | 157  | 258  | 74   |
| NM_134141    | Ciapi1      | 0.717  | 1.095 | 5197  | 4530  | 5923  | 328  | 395  | 256  |
| NM_172718    | Sgsm1       | -0.956 | 1.095 | 4207  | 857   | 1799  | 3743 | 2271 | 1545 |
| NM_009837    | Cct4        | 0.560  | 1.092 | 5674  | 5440  | 4951  | 367  | 96   | 397  |
| NM_025567    | Cyc1        | 0.356  | 1.092 | 5991  | 4102  | 5671  | 88   | 115  | 89   |
| NM_133971    | Ankrd10     | -0.063 | 1.091 | 8453  | 6356  | 6845  | 544  | 617  | 440  |
| NM_178601    | Imp4        | 0.679  | 1.091 | 6004  | 3360  | 4380  | 163  | 336  | 191  |
| NM_025302    | Mrpl2       | 0.486  | 1.090 | 4290  | 3926  | 4256  | 111  | 150  | 134  |
| NM_008439    | Khk         | -0.026 | 1.090 | 2024  | 1226  | 518   | 663  | 540  | 133  |
| NM_175485    | Prtg        | 0.246  | 1.090 | 4006  | 3714  | 4157  | 4494 | 1759 | 3432 |
| NM_018872    | Tmem131     | -0.018 | 1.084 | 8228  | 5766  | 6015  | 3149 | 3540 | 4137 |
| NM_026665    | Cep57       | 0.493  | 1.084 | 6806  | 6139  | 6777  | 338  | 407  | 387  |

|              |            |        |       |      |       |      |      |      |      |
|--------------|------------|--------|-------|------|-------|------|------|------|------|
| NM_026171    | Nvl        | 0.065  | 1.084 | 3578 | 2623  | 3136 | 875  | 1023 | 1182 |
| NM_177379    | Grit       | 0.446  | 1.082 | 329  | 252   | 320  | 921  | 1058 | 1341 |
| NM_025910    | Mina       | -0.015 | 1.082 | 2105 | 1729  | 2723 | 288  | 512  | 532  |
| NM_139198    | Plac8      | 0.539  | 1.082 | 227  | 1172  | 232  | 723  | 600  | 310  |
| NM_026068    | Med31      | 0.428  | 1.080 | 3867 | 3444  | 3313 | 283  | 177  | 59   |
| NM_138653    | Bspry      | 0.122  | 1.080 | 1066 | 168   | 141  | 772  | 1545 | 362  |
| NM_011967    | Psma5      | 0.849  | 1.079 | 2831 | 3991  | 3162 | 367  | 409  | 232  |
| NM_144925    | Tnrc6a     | 0.794  | 1.078 | 3280 | 3681  | 2715 | 1256 | 969  | 1037 |
| NM_029891    | Nkrf       | 0.339  | 1.078 | 1674 | 1928  | 2087 | 155  | 305  | 295  |
| NM_173757    | Mrps27     | 0.282  | 1.075 | 4811 | 4183  | 4515 | 1304 | 1659 | 1576 |
| NM_009940    | Coq7       | 0.240  | 1.072 | 2723 | 1848  | 1171 | 178  | 45   | 79   |
| NM_013614    | Odc1       | 0.273  | 1.071 | 4145 | 4158  | 3832 | 288  | 183  | 113  |
| NM_001081267 | Rsf1       | 0.578  | 1.071 | 6507 | 5518  | 4641 | 1482 | 1650 | 1234 |
| NM_023324    | Peli1      | 0.193  | 1.071 | 3847 | 4300  | 4230 | 1425 | 1582 | 1729 |
| NM_145569    | Mat2a      | 0.409  | 1.071 | 6630 | 12590 | 7122 | 102  | 223  | 201  |
| NM_007764    | Crkl       | 0.420  | 1.070 | 6637 | 7140  | 7621 | 715  | 798  | 1124 |
| NM_008052    | Dtx1       | -0.182 | 1.070 | 5036 | 430   | 1677 | 3990 | 2041 | 1817 |
| NM_016755    | Atp5j      | -0.445 | 1.068 | 6144 | 5389  | 6293 | 278  | 217  | 168  |
| NM_028487    | Gpbp1      | -0.034 | 1.068 | 6212 | 4578  | 5436 | 730  | 1520 | 1811 |
| NM_028812    | Gtf2e1     | -0.145 | 1.068 | 3547 | 3163  | 3428 | 510  | 652  | 787  |
| NM_172755    | Sfrs14     | 0.478  | 1.068 | 4084 | 3244  | 4046 | 492  | 690  | 813  |
| NM_011700    | Vill       | -0.025 | 1.066 | 827  | 280   | 765  | 1306 | 1356 | 499  |
| NM_009708    | Rnd2       | -0.348 | 1.066 | 2699 | 1618  | 2260 | 522  | 166  | 105  |
| NM_011294    | Rpo2tc1    | -0.370 | 1.066 | 3663 | 4581  | 4354 | 228  | 468  | 462  |
| NM_029036    | S100pbp    | 0.483  | 1.066 | 5913 | 6392  | 4238 | 571  | 735  | 459  |
| NM_008133    | Lgsn       | -0.215 | 1.064 | 7281 | 6258  | 6602 | 538  | 780  | 1072 |
| NM_001040686 | Zfp692     | 0.284  | 1.063 | 2424 | 1884  | 2192 | 374  | 301  | 138  |
| NM_010473    | Hrc        | 0.386  | 1.063 | 486  | 486   | 375  | 266  | 1132 | 400  |
| NM_029976    | Cdkn2aipnl | 0.917  | 1.062 | 3007 | 2714  | 2465 | 260  | 263  | 186  |

|              |               |        |       |      |      |      |      |      |      |
|--------------|---------------|--------|-------|------|------|------|------|------|------|
| NM_011729    | Ercc5         | -0.641 | 1.062 | 2635 | 3388 | 3788 | 709  | 872  | 914  |
| NM_026728    | Echdc2        | -1.016 | 1.061 | 1854 | 1432 | 1707 | 415  | 1474 | 354  |
| NM_177301    | Hnrpl         | 0.888  | 1.061 | 4262 | 4537 | 2755 | 300  | 161  | 70   |
| NM_175394    | Wtap          | 0.595  | 1.061 | 5678 | 5140 | 4867 | 403  | 412  | 432  |
| NM_018790    | Arc           | -0.048 | 1.061 | 4267 | 1341 | 906  | 585  | 400  | 893  |
| NM_026476    | 2610101N10Rik | 0.731  | 1.060 | 6406 | 5253 | 5280 | 918  | 902  | 1417 |
| NM_025886    | Rassf7        | 0.605  | 1.058 | 3530 | 1368 | 1394 | 131  | 147  | 54   |
| NM_183417    | Cdk2          | 0.583  | 1.057 | 2638 | 4680 | 3608 | 290  | 355  | 290  |
| NM_033079    | D6Mm5e        | -0.009 | 1.056 | 488  | 1534 | 882  | 4509 | 3952 | 3946 |
| NM_025301    | Mrpl17        | 0.437  | 1.055 | 4809 | 4189 | 2720 | 264  | 224  | 136  |
| NM_152810    | Cdc5l         | 0.448  | 1.055 | 7234 | 6811 | 6412 | 622  | 1379 | 1044 |
| NM_010435    | Hira          | 0.491  | 1.052 | 8809 | 5647 | 7876 | 1952 | 1991 | 2391 |
| NM_172404    | Ccbl1         | 0.000  | 1.051 | 2918 | 2769 | 3947 | 554  | 447  | 660  |
| NM_028775    | Cyp2s1        | -0.123 | 1.047 | 1480 | 151  | 433  | 560  | 870  | 463  |
| NM_011971    | Psmb3         | -0.096 | 1.047 | 5440 | 3782 | 4259 | 371  | 359  | 275  |
| NM_009081    | Rpl28         | 0.514  | 1.045 | 5098 | 3828 | 2359 | 12   | 45   | 13   |
| NM_008193    | Guk1          | -0.575 | 1.045 | 4186 | 2177 | 3211 | 360  | 329  | 186  |
| NM_001081746 | EG665378      | 0.048  | 1.044 | 14   | 122  | 396  | 103  | 97   | 96   |
| NM_028760    | Cep55         | 0.879  | 1.043 | 4284 | 4109 | 3811 | 409  | 414  | 559  |
| NM_019761    | Nxt1          | 0.286  | 1.043 | 2509 | 3528 | 2874 | 40   | 42   | 63   |
| NM_198108    | Morn4         | 0.871  | 1.043 | 2767 | 1514 | 1384 | 301  | 429  | 381  |
| NM_027292    | Bzrpl1        | 0.013  | 1.043 | 200  | 93   | 25   | 292  | 274  | 174  |
| NM_001033463 | Tatdn2        | 0.488  | 1.043 | 4240 | 5910 | 5199 | 263  | 381  | 296  |
| NM_010613    | Khsrp         | 0.539  | 1.039 | 4054 | 5458 | 4069 | 420  | 301  | 244  |
| NM_008802    | Pde7a         | 0.492  | 1.039 | 377  | 255  | 209  | 613  | 818  | 483  |
| NM_145583    | Frag1         | -0.165 | 1.038 | 1421 | 1529 | 1301 | 196  | 389  | 89   |
| NM_009131    | Clec11a       | 0.600  | 1.038 | 2392 | 1189 | 1092 | 428  | 276  | 114  |
| NM_020569    | Park7         | 0.482  | 1.036 | 1409 | 1713 | 1354 | 378  | 359  | 122  |
| NM_130892    | Rtn4ip1       | 0.004  | 1.036 | 2826 | 3324 | 2775 | 1430 | 769  | 1475 |

|              |               |        |       |      |      |      |      |      |      |
|--------------|---------------|--------|-------|------|------|------|------|------|------|
| NM_054087    | Slc19a2       | -0.317 | 1.036 | 7138 | 5096 | 6235 | 546  | 331  | 485  |
| NM_028875    | Xrcc3         | 0.641  | 1.035 | 3473 | 3101 | 2721 | 450  | 347  | 137  |
| NM_007554    | Bmp4          | -3.102 | 1.031 | 4346 | 478  | 1684 | 1252 | 1718 | 3693 |
| NM_013462    | Adrb3         | -0.129 | 1.031 | 8084 | 406  | 1917 | 290  | 568  | 391  |
| NM_019937    | Ccnl1         | 0.308  | 1.031 | 5899 | 9144 | 3953 | 215  | 382  | 248  |
| NM_020024    | Taf10         | 0.615  | 1.030 | 1919 | 1595 | 1576 | 38   | 54   | 22   |
| NM_009795    | Capns1        | 0.398  | 1.029 | 4299 | 4143 | 2533 | 135  | 103  | 79   |
| NM_146089    | Ccdc5         | 0.152  | 1.026 | 2335 | 2109 | 2195 | 153  | 177  | 205  |
| NM_011192    | Psme3         | 0.265  | 1.025 | 5079 | 3745 | 4795 | 271  | 141  | 164  |
| NM_016867    | Gipc2         | 0.356  | 1.024 | 4562 | 577  | 1092 | 3314 | 1915 | 1392 |
| NM_018747    | Akap7         | 0.633  | 1.024 | 3153 | 3304 | 3103 | 4187 | 3273 | 4525 |
| NM_026989    | Sfrs11        | 0.586  | 1.024 | 21   | 43   | 61   | 208  | 283  | 135  |
| NM_183311    | B930076A02    | 0.025  | 1.023 | 2331 | 487  | 1026 | 1375 | 2880 | 1699 |
| NM_001013372 | Nrp           | -0.080 | 1.023 | 3702 | 4208 | 2626 | 13   | 12   | 34   |
| NM_009391    | Ran           | 0.371  | 1.023 | 6974 | 5644 | 5165 | 95   | 81   | 36   |
| NM_021559    | Zfp191        | 0.164  | 1.021 | 3477 | 4012 | 3829 | 228  | 168  | 246  |
| NM_138669    | Eif4a3        | -0.148 | 1.020 | 5511 | 3543 | 4263 | 211  | 392  | 350  |
| NM_026603    | Denr          | 0.556  | 1.020 | 3933 | 3050 | 2698 | 403  | 508  | 276  |
| NM_016714    | Nup50         | 0.165  | 1.019 | 5052 | 5852 | 6013 | 313  | 475  | 467  |
| NM_199195    | Bckdhb        | -0.239 | 1.019 | 844  | 1414 | 3196 | 3237 | 3861 | 4723 |
| NM_025582    | 2810405K02Rik | -0.552 | 1.018 | 1430 | 746  | 2121 | 267  | 411  | 89   |
| NM_030680    | Upf1          | 0.289  | 1.017 | 5223 | 4804 | 5675 | 969  | 484  | 478  |
| NM_010852    | Myef2         | 0.812  | 1.016 | 188  | 123  | 147  | 447  | 415  | 567  |
| NM_001044744 | Gcdh          | -0.754 | 1.015 | 2783 | 2028 | 3825 | 223  | 138  | 345  |
| NM_026120    | 2410127L17Rik | -0.146 | 1.015 | 4223 | 3007 | 2957 | 545  | 760  | 780  |
| NM_008471    | Krt19         | 0.782  | 1.014 | 1529 | 623  | 302  | 824  | 410  | 696  |
| NM_023524    | Tfpt          | 0.423  | 1.012 | 4064 | 3130 | 2836 | 197  | 153  | 163  |
| NM_007765    | Crmp1         | 0.657  | 1.011 | 2368 | 1626 | 1800 | 1951 | 2300 | 1113 |
| NM_001007465 | Rffl          | -0.176 | 1.010 | 4842 | 2963 | 3988 | 2811 | 1587 | 1303 |

|           |               |        |       |      |      |      |      |      |      |
|-----------|---------------|--------|-------|------|------|------|------|------|------|
| NM_010178 | Fusip1        | 0.113  | 1.009 | 4878 | 5003 | 3107 | 168  | 222  | 153  |
| NM_153062 | Slc37a1       | -0.007 | 1.008 | 3196 | 1741 | 1985 | 1808 | 4806 | 3533 |
| NM_026654 | Toe1          | 0.717  | 1.004 | 4560 | 3195 | 2674 | 162  | 131  | 29   |
| NM_013742 | Cars          | 0.303  | 1.002 | 6900 | 5979 | 4150 | 927  | 943  | 386  |
| NR_003642 | 2900062L11Rik | -1.539 | 1.001 | 186  | 89   | 228  | 10   | 55   | 25   |
| NM_011943 | Map2k6        | 0.395  | 1.001 | 1615 | 3702 | 2170 | 6420 | 4425 | 3487 |
| NM_016876 | Eif3s4        | 0.303  | 1.001 | 3146 | 3232 | 4078 | 136  | 206  | 98   |
| NM_008102 | Gch1          | -0.319 | 1.001 | 3045 | 1104 | 3028 | 1905 | 1989 | 1320 |
| NM_025337 | Akr7a5        | -0.041 | 1.000 | 4980 | 3764 | 3963 | 324  | 223  | 55   |
