# Supplementary material for: Identification of the early and late responder genes during the generation of induced pluripotent stem cells from mouse fibroblasts
Source: PubMed Central journal article supplement (PMC5289558; doi:10.1371/journal.pone.0171300), 2017-02-02
Supplement: pone.0171300.s010.pdf [file pone.0171300.s010.pdf]

**S4 Table. Divergent down genes**

| Gene information |               | mRNA fold change |            | H3K4me3 enrichment |       |       | H3K27me3 enrichment |       |       |
|------------------|---------------|------------------|------------|--------------------|-------|-------|---------------------|-------|-------|
| RefSeq gene      | gene symbol   | iPSCp/sFB-G      | mESC/sFB-G | mESC               | iPSCp | sFB-G | mESC                | iPSCp | sFB-G |
| NM_009696        | ApoE          | -4.944           | 0.495      | 5394               | 13    | 1173  | 72                  | 70    | 82    |
| NM_010112        | Efs           | -4.163           | -0.567     | 3364               | 276   | 5266  | 456                 | 1103  | 496   |
| NM_138595        | Gldc          | -4.041           | 2.063      | 3884               | 1043  | 2583  | 1525                | 8019  | 2891  |
| NM_007806        | Cyba          | -3.612           | -0.875     | 1758               | 327   | 4065  | 665                 | 609   | 217   |
| NM_010493        | Icam1         | -3.415           | -0.539     | 2645               | 90    | 2951  | 506                 | 1864  | 611   |
| NM_007554        | Bmp4          | -3.102           | 1.031      | 4346               | 478   | 1684  | 1252                | 1718  | 3693  |
| NM_198095        | Bst2          | -2.969           | -0.766     | 2016               | 3126  | 4144  | 101                 | 10    | 39    |
| NR_003634        | Rps4y2        | -2.835           | 2.872      | 4059               | 235   | 1048  | 65                  | 36    | 62    |
| NM_007805        | Cyb561        | -2.805           | 0.179      | 4165               | 632   | 2528  | 632                 | 1508  | 396   |
| NM_145562        | 9130213B05Rik | -2.574           | -0.910     | 2829               | 1068  | 3154  | 3537                | 5159  | 1495  |
| NM_023627        | Isyna1        | -2.554           | 0.777      | 3615               | 29    | 1445  | 369                 | 116   | 58    |
| NM_172285        | Plcg2         | -2.546           | 0.943      | 4447               | 1165  | 4405  | 5796                | 5104  | 3452  |
| NM_175329        | Chchd10       | -2.545           | 4.188      | 4062               | 57    | 511   | 146                 | 148   | 80    |
| NM_029674        | Got1l1        | -2.526           | 1.594      | 58                 | 17    | 10    | 189                 | 489   | 76    |
| NM_001081642     | Xlr4a         | -2.501           | -0.422     | 10                 | 12    | 30    | 111                 | 342   | 101   |
| NM_009876        | Cdkn1c        | -2.499           | 1.849      | 1582               | 271   | 811   | 2111                | 491   | 977   |
| NM_145402        | Tmem51        | -2.419           | 1.771      | 4679               | 654   | 1901  | 1497                | 1768  | 1200  |
| NM_010094        | Lefty1        | -2.413           | 0.173      | 704                | 19    | 788   | 575                 | 149   | 167   |
| NM_013690        | Tek           | -2.387           | -0.256     | 955                | 991   | 2391  | 2961                | 3320  | 1608  |
| NM_022004        | Fxyd6         | -2.319           | 3.245      | 1343               | 196   | 835   | 1514                | 1478  | 1575  |
| NM_013560        | Hspb1         | -2.297           | 1.424      | 2074               | 515   | 1840  | 54                  | 54    | 45    |
| NM_008816        | Pecam1        | -2.281           | 0.744      | 826                | 881   | 2056  | 2217                | 2485  | 1440  |
| NM_172784        | Lrp11         | -2.279           | 0.375      | 5483               | 1369  | 4458  | 902                 | 1924  | 1086  |
| NM_010882        | Ndn           | -2.191           | 1.314      | 1889               | 23    | 458   | 431                 | 47    | 60    |
| NM_177630        | Ldoc1l        | -2.137           | -0.602     | 2167               | 322   | 1436  | 298                 | 391   | 201   |

|              |               |        |        |       |       |       |      |      |      |
|--------------|---------------|--------|--------|-------|-------|-------|------|------|------|
| NM_010474    | Hs3st1        | -2.086 | 0.043  | 2615  | 654   | 2349  | 1753 | 1044 | 651  |
| NM_026805    | Svop          | -1.993 | -0.005 | 2082  | 522   | 923   | 3129 | 6255 | 1578 |
| NM_018761    | Ctnnal1       | -1.988 | 2.351  | 6132  | 2029  | 3198  | 1040 | 4576 | 886  |
| NM_011125    | Pltp          | -1.972 | -0.878 | 3667  | 1827  | 5180  | 364  | 1153 | 585  |
| NM_198724    | Egfl7         | -1.956 | -0.271 | 3323  | 1044  | 4548  | 413  | 650  | 287  |
| NM_133888    | Smpdl3b       | -1.838 | 0.537  | 4785  | 845   | 1103  | 600  | 1292 | 330  |
| NM_007707    | Socs3         | -1.803 | 1.346  | 11524 | 8544  | 14073 | 417  | 74   | 94   |
| NM_013640    | Psmb10        | -1.789 | -0.824 | 3247  | 4187  | 5797  | 140  | 116  | 55   |
| NM_009663    | Alox5ap       | -1.742 | -0.879 | 432   | 360   | 1439  | 1509 | 599  | 544  |
| NM_023844    | Jam2          | -1.732 | -0.600 | 7736  | 2702  | 5440  | 1001 | 1231 | 2029 |
| NM_011542    | Tcea3         | -1.712 | 1.284  | 2903  | 609   | 2993  | 1644 | 3149 | 609  |
| NM_010442    | Hmox1         | -1.705 | -0.665 | 3834  | 3617  | 4060  | 178  | 76   | 119  |
| NM_009143    | Sdf2          | -1.645 | -0.776 | 7195  | 4740  | 5587  | 234  | 312  | 262  |
| NM_007420    | Adrb2         | -1.641 | 0.007  | 3511  | 1775  | 4692  | 506  | 55   | 60   |
| NM_008046    | Fst           | -1.637 | -0.702 | 3115  | 3054  | 4909  | 2024 | 470  | 135  |
| NM_026428    | Dcxr          | -1.637 | 0.222  | 3120  | 1547  | 3256  | 251  | 89   | 47   |
| NM_001009935 | Txnip         | -1.630 | -0.287 | 7316  | 14157 | 4790  | 225  | 250  | 66   |
| NM_144538    | Rab3il1       | -1.625 | -0.848 | 1702  | 3765  | 8579  | 1412 | 1445 | 202  |
| NM_027185    | Def6          | -1.617 | -0.462 | 3866  | 1889  | 4591  | 557  | 1974 | 652  |
| NM_172729    | Nod1          | -1.597 | 0.256  | 4182  | 4038  | 4757  | 1839 | 2025 | 937  |
| NM_027857    | Acy3          | -1.587 | -0.365 | 203   | 156   | 418   | 111  | 216  | 134  |
| NM_026615    | Urm1          | -1.574 | -0.733 | 4802  | 4197  | 4150  | 954  | 333  | 405  |
| NM_001042675 | Rbpms         | -1.561 | 1.149  | 7659  | 4416  | 4887  | 2425 | 4562 | 1196 |
| NM_012030    | Slc9a3r1      | -1.560 | -0.690 | 4225  | 3194  | 8262  | 1241 | 500  | 330  |
| NM_172607    | Naprt1        | -1.548 | 0.774  | 1742  | 755   | 2955  | 448  | 269  | 127  |
| NR_003642    | 2900062L11Rik | -1.539 | 1.001  | 186   | 89    | 228   | 10   | 55   | 25   |
| NM_010356    | Gsta3         | -1.529 | -0.668 | 212   | 220   | 320   | 595  | 983  | 1001 |
| NM_022721    | Fzd5          | -1.516 | 1.455  | 12430 | 3666  | 5822  | 366  | 262  | 161  |
| NM_178699    | B930041F14Rik | -1.482 | -0.009 | 6950  | 2249  | 3129  | 123  | 1328 | 11   |

|           |           |        |        |      |       |       |       |       |      |
|-----------|-----------|--------|--------|------|-------|-------|-------|-------|------|
| NM_176848 | Fbxo2     | -1.481 | 1.302  | 2399 | 1464  | 1401  | 1661  | 2179  | 1335 |
| NM_019448 | Dnmt3l    | -1.428 | 4.189  | 3018 | 171   | 693   | 322   | 1145  | 503  |
| NM_008378 | Impact    | -1.421 | -0.513 | 5948 | 2571  | 4407  | 482   | 613   | 592  |
| NM_029619 | Msrb2     | -1.416 | -0.390 | 2168 | 1599  | 2467  | 750   | 815   | 617  |
| NM_023065 | Ifi30     | -1.414 | 0.393  | 1784 | 1877  | 1776  | 354   | 106   | 117  |
| NM_178195 | Hist1h2bf | -1.410 | 0.040  | 161  | 310   | 273   | 10    | 10    | 10   |
| NM_172145 | Fam176b   | -1.408 | -0.745 | 3105 | 2254  | 3400  | 109   | 48    | 19   |
| NM_030255 | Apobec3   | -1.393 | 0.040  | 1977 | 474   | 5145  | 270   | 1207  | 381  |
| NM_013587 | Lrpap1    | -1.393 | 0.431  | 5751 | 2057  | 2086  | 352   | 944   | 159  |
| NM_009721 | Atp1b1    | -1.373 | 2.438  | 6289 | 633   | 1723  | 648   | 830   | 2107 |
| NM_178198 | Hist1h2bj | -1.367 | -0.680 | 233  | 471   | 419   | 11    | 59    | 14   |
| NM_011193 | Pstpip1   | -1.367 | -0.541 | 1531 | 311   | 2024  | 2304  | 1216  | 685  |
| NM_028064 | Slc39a4   | -1.365 | 2.150  | 1023 | 109   | 515   | 313   | 790   | 154  |
| NM_178200 | Hist1h2bm | -1.364 | -0.566 | 423  | 424   | 404   | 38    | 119   | 61   |
| NM_007494 | Ass1      | -1.346 | -0.099 | 3039 | 1369  | 3866  | 1505  | 2183  | 1009 |
| NM_025386 | Fbxo36    | -1.322 | -0.501 | 7828 | 4572  | 5674  | 1314  | 1392  | 1296 |
| NM_133663 | Itgb4     | -1.322 | 0.344  | 4292 | 1071  | 3217  | 3950  | 2615  | 3205 |
| NM_007925 | Eln       | -1.315 | -0.698 | 744  | 398   | 936   | 3048  | 4978  | 1747 |
| NM_019764 | Amotl2    | -1.313 | -0.828 | 8575 | 13733 | 16503 | 829   | 409   | 298  |
| NM_024229 | Pcyt2     | -1.297 | 0.346  | 3536 | 1991  | 3687  | 291   | 152   | 197  |
| NM_025482 | Tpd52l2   | -1.284 | -0.606 | 4902 | 2813  | 4050  | 242   | 305   | 486  |
| NM_173739 | Galntl4   | -1.268 | -0.914 | 3122 | 2667  | 4098  | 11497 | 16231 | 4067 |
| NM_013559 | Hsp105    | -1.241 | -0.642 | 5169 | 4151  | 6307  | 459   | 375   | 444  |
| NM_180962 | Cyhr1     | -1.230 | -0.731 | 1752 | 1187  | 1383  | 123   | 83    | 55   |
| NM_021515 | Ak1       | -1.228 | -0.978 | 2829 | 2153  | 5216  | 198   | 75    | 152  |
| NM_010893 | Neu1      | -1.206 | -0.837 | 2625 | 2756  | 4014  | 214   | 99    | 81   |
| NM_018854 | Ift20     | -1.202 | -0.480 | 4921 | 4322  | 5334  | 117   | 110   | 190  |
| NM_010499 | Ier2      | -1.193 | -0.988 | 8947 | 5757  | 8365  | 79    | 64    | 81   |
| NM_011446 | Sox7      | -1.191 | -0.038 | 1222 | 294   | 2186  | 1990  | 1842  | 1216 |

|              |           |        |        |      |      |       |      |      |      |
|--------------|-----------|--------|--------|------|------|-------|------|------|------|
| NM_028679    | Irak3     | -1.185 | -0.454 | 4177 | 4074 | 3854  | 2150 | 3661 | 1511 |
| NM_022880    | Slc29a1   | -1.184 | -0.086 | 727  | 152  | 880   | 282  | 377  | 112  |
| NM_019949    | Ube2l6    | -1.164 | -0.118 | 1791 | 2269 | 2790  | 463  | 217  | 176  |
| NM_001004150 | A4galt    | -1.138 | -0.854 | 3579 | 1798 | 4408  | 749  | 1328 | 578  |
| NM_054056    | Pawr      | -1.136 | 0.942  | 5650 | 2432 | 5605  | 1991 | 4297 | 2289 |
| NM_008326    | Irgm1     | -1.133 | 0.060  | 152  | 5740 | 5524  | 591  | 214  | 188  |
| NM_025835    | Pccb      | -1.133 | -0.851 | 1912 | 1819 | 2287  | 1233 | 907  | 868  |
| NM_175665    | Hist1h2bk | -1.129 | -0.140 | 460  | 435  | 392   | 12   | 20   | 16   |
| NM_009189    | Six1      | -1.122 | -0.481 | 5059 | 4660 | 6489  | 2252 | 524  | 395  |
| NM_007591    | Calr      | -1.116 | 0.095  | 5384 | 5379 | 8037  | 149  | 175  | 198  |
| NM_001001181 | BC031181  | -1.113 | -0.454 | 2809 | 1795 | 2955  | 90   | 106  | 51   |
| NM_172702    | Serinc2   | -1.108 | -0.503 | 2231 | 738  | 1986  | 2069 | 2842 | 353  |
| NM_019568    | Cxcl14    | -1.091 | -0.028 | 3502 | 280  | 2266  | 2037 | 1203 | 1681 |
| NM_023635    | Rab27a    | -1.088 | 1.871  | 2397 | 583  | 1455  | 1375 | 2920 | 1973 |
| NM_001039533 | Pdxdc1    | -1.083 | -0.959 | 5328 | 4420 | 5840  | 1364 | 1650 | 1766 |
| NM_010395    | H2-T10    | -1.083 | -0.560 | 72   | 18   | 243   | 178  | 231  | 54   |
| NM_194344    | Sh3tc1    | -1.081 | 0.494  | 712  | 290  | 1268  | 1206 | 2513 | 707  |
| NM_172498    | Ptk2b     | -1.078 | -0.899 | 2116 | 1975 | 5808  | 4852 | 7258 | 3309 |
| NM_013529    | Gfpt2     | -1.078 | 0.662  | 2948 | 2455 | 5763  | 1714 | 2956 | 1228 |
| NM_199018    | Stard8    | -1.074 | 0.924  | 1581 | 477  | 1587  | 824  | 1348 | 487  |
| NM_010907    | Nfkbia    | -1.071 | 0.184  | 4084 | 3282 | 3595  | 90   | 159  | 58   |
| NM_028544    | Rasip1    | -1.070 | 0.230  | 2436 | 944  | 1540  | 1394 | 1301 | 333  |
| NM_133708    | Gmppa     | -1.066 | -0.504 | 1232 | 2474 | 3152  | 495  | 274  | 382  |
| NM_007398    | Ada       | -1.052 | -0.602 | 1568 | 1864 | 4899  | 1183 | 818  | 473  |
| NM_027400    | Lman1     | -1.045 | -0.877 | 3323 | 3656 | 4481  | 399  | 714  | 938  |
| NM_008390    | Irf1      | -1.029 | 0.078  | 5404 | 5674 | 6946  | 527  | 499  | 201  |
| NM_178201    | Hist1h2bn | -1.027 | 0.368  | 387  | 737  | 539   | 46   | 43   | 15   |
| NM_013750    | Phlda3    | -1.025 | 0.312  | 7844 | 9317 | 10048 | 544  | 51   | 93   |
| NM_008604    | Mme       | -1.020 | 0.927  | 3167 | 1624 | 1674  | 1267 | 1986 | 2140 |

|           |          |        |        |      |      |      |     |      |      |
|-----------|----------|--------|--------|------|------|------|-----|------|------|
| NM_023322 | Zkscan14 | -1.018 | -0.493 | 1795 | 2632 | 3540 | 104 | 10   | 102  |
| NM_026728 | Echdc2   | -1.016 | 1.061  | 1854 | 1432 | 1707 | 415 | 1474 | 354  |
| NM_178149 | Pik3ip1  | -1.015 | -0.867 | 1052 | 3388 | 2652 | 748 | 354  | 250  |
| NM_025290 | Rsph1    | -1.013 | 2.791  | 1083 | 552  | 1098 | 553 | 2981 | 1258 |
| NM_009657 | Aldoc    | -1.013 | 2.286  | 229  | 93   | 105  | 171 | 10   | 101  |
| NM_183170 | BC051227 | -1.004 | 0.240  | 2523 | 2185 | 3581 | 146 | 64   | 37   |
