# Supplementary material for: Identification of the early and late responder genes during the generation of induced pluripotent stem cells from mouse fibroblasts
Source: PubMed Central journal article supplement (PMC5289558; doi:10.1371/journal.pone.0171300), 2017-02-02
Supplement: pone.0171300.s011.pdf [file pone.0171300.s011.pdf]

**S5 Table. Convergent down genes**

| Gene information |               | mRNA fold change |            | H3K4me3 enrichment |       |       | H3K27me3 enrichment |       |       |
|------------------|---------------|------------------|------------|--------------------|-------|-------|---------------------|-------|-------|
| RefSeq gene      | gene symbol   | iPSCp/sFB-G      | mESC/sFB-G | mESC               | iPSCp | sFB-G | mESC                | iPSCp | sFB-G |
| NM_010514        | Igf2          | -6.278           | -1.248     | 1218               | 80    | 1380  | 2251                | 1166  | 814   |
| NM_019521        | Gas6          | -6.237           | -6.290     | 2429               | 1422  | 10339 | 1686                | 3399  | 1046  |
| NM_173749        | E430002G05Rik | -5.859           | -5.648     | 367                | 523   | 5070  | 3817                | 4280  | 3920  |
| NM_019696        | Cpxm1         | -5.756           | -3.946     | 1640               | 215   | 2778  | 629                 | 358   | 359   |
| NM_054077        | Prelp         | -5.542           | -7.650     | 167                | 110   | 4011  | 965                 | 699   | 269   |
| NM_009776        | Serping1      | -5.538           | -4.761     | 314                | 317   | 3178  | 435                 | 1187  | 365   |
| NM_008161        | Gpx3          | -5.491           | -4.895     | 1318               | 228   | 7400  | 378                 | 797   | 167   |
| NM_010216        | Figf          | -5.405           | -6.554     | 408                | 895   | 2928  | 302                 | 468   | 337   |
| NM_009778        | C3            | -5.388           | -5.229     | 383                | 363   | 510   | 2212                | 3496  | 700   |
| NM_176922        | Itga11        | -5.212           | -6.183     | 1851               | 1734  | 8712  | 8148                | 5451  | 2820  |
| NM_022814        | Svep1         | -5.115           | -5.231     | 2750               | 3263  | 6806  | 7526                | 5336  | 3560  |
| NM_019759        | Dpt           | -5.019           | -6.467     | 167                | 610   | 5322  | 1178                | 880   | 952   |
| NM_007876        | Dpep1         | -4.947           | -5.139     | 228                | 190   | 1996  | 783                 | 1167  | 702   |
| NM_001083895     | Srpx2         | -4.851           | -6.796     | 60                 | 583   | 1992  | 600                 | 793   | 377   |
| NM_015814        | Dkk3          | -4.837           | -3.868     | 1214               | 615   | 3038  | 2426                | 2954  | 771   |
| NM_008489        | Lbp           | -4.563           | -4.783     | 251                | 168   | 2709  | 1271                | 2399  | 769   |
| NM_016873        | Wisp2         | -4.519           | -7.600     | 168                | 996   | 8713  | 629                 | 275   | 362   |
| NM_011150        | Lgals3bp      | -4.514           | -7.939     | 203                | 1406  | 4056  | 719                 | 192   | 269   |
| NM_008607        | Mmp13         | -4.471           | -5.012     | 18                 | 31    | 143   | 386                 | 207   | 443   |
| NM_008760        | Ogn           | -4.432           | -5.762     | 26                 | 768   | 1445  | 378                 | 277   | 549   |
| NM_010501        | Ifit3         | -4.392           | -6.149     | 16                 | 577   | 350   | 264                 | 215   | 140   |
| NM_026864        | Rasl11a       | -4.327           | -3.809     | 2482               | 1000  | 5432  | 556                 | 173   | 109   |
| NM_009675        | Aoc3          | -4.309           | -4.254     | 286                | 376   | 817   | 345                 | 451   | 229   |
| NM_007801        | Ctsh          | -4.238           | -5.774     | 1915               | 1829  | 3573  | 1497                | 699   | 488   |
| NM_029568        | Mfap4         | -4.150           | -3.773     | 229                | 126   | 242   | 393                 | 213   | 185   |

|           |         |        |        |      |      |       |       |      |      |
|-----------|---------|--------|--------|------|------|-------|-------|------|------|
| NM_175643 | Adamts2 | -4.067 | -7.318 | 7405 | 3495 | 12272 | 16226 | 7612 | 8050 |
| NM_008509 | Lpl     | -4.059 | -5.863 | 1213 | 3277 | 7039  | 1816  | 734  | 643  |
| NM_021719 | Cldn15  | -3.985 | -4.369 | 146  | 260  | 2504  | 349   | 409  | 190  |
| NM_016911 | Srpx    | -3.934 | -4.874 | 251  | 996  | 2043  | 1463  | 1224 | 1210 |
| NM_008185 | Gstt1   | -3.929 | -3.238 | 503  | 806  | 2813  | 916   | 1506 | 503  |
| NM_010330 | Emb     | -3.908 | -2.177 | 3361 | 1594 | 4599  | 1032  | 1398 | 1532 |
| NM_015744 | Enpp2   | -3.872 | -3.659 | 723  | 1048 | 1177  | 3519  | 4226 | 4439 |
| NM_019498 | Olfm1   | -3.871 | -3.757 | 2224 | 584  | 3079  | 2248  | 2161 | 515  |
| NM_019946 | Mgst1   | -3.838 | -5.498 | 345  | 1204 | 4794  | 685   | 655  | 441  |
| NM_021342 | Kcne4   | -3.792 | -4.427 | 26   | 1203 | 5776  | 334   | 74   | 81   |
| NM_133903 | Spon2   | -3.775 | -2.886 | 362  | 103  | 204   | 366   | 501  | 41   |
| NM_008610 | Mmp2    | -3.746 | -5.580 | 1571 | 1985 | 6620  | 1682  | 649  | 736  |
| NM_013834 | Sfrp1   | -3.708 | -2.694 | 3402 | 1025 | 6898  | 2427  | 2464 | 606  |
| NM_009780 | C4b     | -3.644 | -3.469 | 179  | 285  | 259   | 1018  | 1366 | 537  |
| NM_008597 | Mgp     | -3.597 | -5.511 | 68   | 1117 | 1480  | 225   | 264  | 87   |
| NM_008059 | G0s2    | -3.533 | -3.931 | 959  | 447  | 3346  | 207   | 315  | 83   |
| NM_010517 | Igfbp4  | -3.494 | -3.800 | 1677 | 1271 | 4217  | 2149  | 2175 | 473  |
| NM_194334 | Tbc1d2b | -3.390 | -4.926 | 3662 | 4565 | 7652  | 1954  | 1531 | 1489 |
| NM_017370 | Hp      | -3.366 | -3.426 | 19   | 36   | 239   | 280   | 265  | 102  |
| NM_016847 | Avpr1a  | -3.359 | -5.177 | 1038 | 4932 | 9692  | 1184  | 795  | 289  |
| NM_008546 | Mfap2   | -3.339 | -3.144 | 299  | 358  | 1522  | 271   | 1036 | 143  |
| NM_009627 | Adm     | -3.335 | -3.514 | 880  | 5074 | 5883  | 1279  | 337  | 37   |
| NM_029803 | Ifi27   | -3.307 | -3.885 | 10   | 184  | 203   | 99    | 205  | 47   |
| NM_026235 | Larp6   | -3.287 | -4.072 | 1734 | 991  | 4621  | 1345  | 1268 | 494  |
| NM_134102 | Pla1a   | -3.281 | -3.519 | 609  | 552  | 2378  | 1462  | 1091 | 891  |
| NM_019444 | Ramp2   | -3.279 | -2.966 | 1220 | 538  | 2406  | 1011  | 1277 | 495  |
| NM_153107 | Cpz     | -3.275 | -2.345 | 1585 | 295  | 1737  | 2419  | 3851 | 1105 |
| NM_008008 | Fgf7    | -3.266 | -5.171 | 185  | 7156 | 9511  | 1732  | 911  | 1325 |
| NM_008987 | Ptx3    | -3.256 | -5.185 | 1826 | 3767 | 3962  | 1044  | 428  | 252  |

|              |         |        |        |      |      |       |       |       |       |
|--------------|---------|--------|--------|------|------|-------|-------|-------|-------|
| NM_013467    | Aldh1a1 | -3.254 | -3.145 | 100  | 367  | 523   | 1664  | 1412  | 1727  |
| NM_181988    | Rerg    | -3.238 | -3.002 | 1380 | 2144 | 3402  | 5371  | 5938  | 3803  |
| NM_026439    | Ccdc80  | -3.220 | -6.496 | 238  | 5661 | 13444 | 1424  | 876   | 1090  |
| NM_021472    | Ang     | -3.216 | -6.748 | 1964 | 3077 | 4007  | 521   | 500   | 343   |
| NM_027852    | Rarres2 | -3.207 | -3.828 | 14   | 218  | 382   | 130   | 209   | 82    |
| NM_010809    | Mmp3    | -3.194 | -5.940 | 40   | 86   | 459   | 333   | 225   | 299   |
| NM_011819    | Gdf15   | -3.096 | -3.469 | 1337 | 535  | 4223  | 222   | 137   | 41    |
| NM_146162    | Tmem119 | -3.080 | -4.334 | 230  | 1079 | 3067  | 767   | 480   | 68    |
| NM_145467    | Itgbl1  | -3.053 | -4.566 | 597  | 944  | 1379  | 5587  | 3347  | 10093 |
| NM_053195    | Slc24a3 | -3.034 | -5.190 | 1210 | 1846 | 3224  | 12117 | 11122 | 14579 |
| NM_030150    | Dhx58   | -2.959 | -2.104 | 249  | 317  | 1132  | 575   | 116   | 195   |
| NM_010582    | Itih2   | -2.951 | -3.249 | 210  | 265  | 699   | 1833  | 1220  | 1004  |
| NM_133859    | Olfml3  | -2.943 | -6.336 | 113  | 2759 | 2197  | 240   | 107   | 41    |
| NM_009994    | Cyp1b1  | -2.927 | -4.530 | 1833 | 1811 | 6498  | 2742  | 2925  | 895   |
| NM_009841    | Cd14    | -2.922 | -3.897 | 852  | 1549 | 3876  | 681   | 108   | 65    |
| NM_172119    | Dio3    | -2.905 | -2.207 | 1466 | 91   | 1384  | 1807  | 226   | 472   |
| NM_030206    | Cygb    | -2.894 | -4.431 | 1719 | 1578 | 5630  | 2469  | 1471  | 348   |
| NM_133792    | Lypla3  | -2.892 | -2.029 | 3100 | 3091 | 6115  | 243   | 360   | 550   |
| NM_001001183 | ---     | -2.881 | -3.214 | 239  | 356  | 3664  | 814   | 895   | 661   |
| NM_008529    | Ly6e    | -2.844 | -2.875 | 1905 | 2948 | 4473  | 362   | 293   | 138   |
| NM_008592    | Foxc1   | -2.841 | -4.255 | 3033 | 6448 | 11575 | 2885  | 189   | 115   |
| NM_008813    | Enpp1   | -2.829 | -3.916 | 3047 | 2128 | 3730  | 3400  | 2369  | 2412  |
| NM_008788    | Pcolce  | -2.818 | -4.170 | 759  | 4511 | 7548  | 157   | 222   | 150   |
| NM_010145    | Ephx1   | -2.804 | -3.575 | 1696 | 1909 | 3134  | 1353  | 850   | 644   |
| NM_176073    | Pgcp    | -2.765 | -4.615 | 1433 | 3894 | 4807  | 10018 | 10857 | 12776 |
| NM_144945    | Lgi2    | -2.762 | -2.695 | 2064 | 1121 | 1088  | 2407  | 2670  | 845   |
| NM_008176    | Cxcl1   | -2.748 | -5.795 | 114  | 826  | 921   | 136   | 35    | 28    |
| NM_207298    | Cercam  | -2.747 | -1.047 | 3313 | 986  | 3659  | 935   | 427   | 344   |
| NM_181326    | Zfp521  | -2.725 | -3.982 | 1609 | 1220 | 1607  | 6732  | 4962  | 4776  |

|           |           |        |        |      |      |       |      |      |      |
|-----------|-----------|--------|--------|------|------|-------|------|------|------|
| NM_033314 | Slco2a1   | -2.722 | -2.391 | 2519 | 563  | 3709  | 3895 | 3177 | 1679 |
| NM_207655 | Egfr      | -2.683 | -3.975 | 5946 | 5397 | 13626 | 9499 | 4542 | 8734 |
| NM_020581 | Angptl4   | -2.672 | -1.618 | 2047 | 1618 | 3698  | 269  | 702  | 137  |
| NM_207229 | Plac9     | -2.656 | -2.057 | 10   | 12   | 30    | 30   | 146  | 10   |
| NM_010738 | Ly6a      | -2.630 | -6.702 | 35   | 1631 | 1557  | 94   | 216  | 80   |
| NM_013743 | Pdk4      | -2.620 | -1.408 | 2257 | 1224 | 2675  | 398  | 513  | 473  |
| NM_144799 | Lmcd1     | -2.601 | -3.268 | 490  | 922  | 4212  | 2958 | 3520 | 1355 |
| NM_013654 | Ccl7      | -2.588 | -6.396 | 38   | 3028 | 2050  | 202  | 73   | 69   |
| NM_011985 | Mmp23     | -2.579 | -4.112 | 1103 | 483  | 2275  | 362  | 42   | 65   |
| NM_011854 | Oasl2     | -2.559 | -3.448 | 155  | 1315 | 1166  | 455  | 665  | 292  |
| NM_054042 | Cd248     | -2.555 | -4.931 | 1265 | 2903 | 6385  | 1185 | 389  | 231  |
| NM_008458 | Serpina3c | -2.546 | -2.658 | 86   | 99   | 220   | 326  | 522  | 212  |
| NM_020510 | Fzd2      | -2.531 | -3.871 | 4000 | 6515 | 9035  | 1729 | 196  | 421  |
| NM_145515 | Mark1     | -2.523 | -2.895 | 2726 | 2311 | 4457  | 3543 | 3881 | 2617 |
| NM_010189 | Fcgrt     | -2.520 | -3.801 | 211  | 1427 | 1765  | 138  | 263  | 78   |
| NM_013839 | Nr1h3     | -2.495 | -2.745 | 443  | 223  | 1908  | 508  | 177  | 159  |
| NM_009373 | Tgm2      | -2.494 | -2.119 | 806  | 514  | 3209  | 2137 | 1143 | 503  |
| NM_025797 | Cyb5      | -2.490 | -2.434 | 3170 | 3863 | 5730  | 582  | 1304 | 701  |
| NM_008968 | Ptgis     | -2.484 | -2.435 | 2537 | 838  | 4365  | 2189 | 4105 | 1084 |
| NM_029631 | Abhd14b   | -2.483 | -3.206 | 891  | 1722 | 2924  | 257  | 37   | 105  |
| NM_011254 | Rbp1      | -2.478 | -1.396 | 890  | 626  | 2575  | 2126 | 1558 | 530  |
| NM_009142 | Cx3cl1    | -2.476 | -2.709 | 773  | 580  | 2312  | 1382 | 1349 | 278  |
| NM_018738 | Igtp      | -2.436 | -2.752 | 397  | 1792 | 1691  | 941  | 260  | 264  |
| NM_008144 | Bscl2     | -2.428 | -1.393 | 1054 | 649  | 1287  | 226  | 78   | 257  |
| NM_010791 | Meox1     | -2.420 | -2.100 | 589  | 388  | 747   | 2529 | 2353 | 764  |
| NM_153145 | Abca8a    | -2.368 | -2.527 | 178  | 370  | 649   | 2310 | 2621 | 2752 |
| NM_146007 | Col6a2    | -2.358 | -6.231 | 590  | 3226 | 6697  | 2200 | 761  | 1001 |
| NM_010495 | Id1       | -2.356 | -1.474 | 1474 | 3227 | 5150  | 593  | 59   | 57   |
| NM_153790 | Scarf2    | -2.355 | -4.379 | 4466 | 3619 | 6994  | 6606 | 1739 | 768  |

|           |               |        |        |      |      |       |       |      |      |
|-----------|---------------|--------|--------|------|------|-------|-------|------|------|
| NM_031397 | Bicc1         | -2.350 | -4.908 | 4773 | 6084 | 10593 | 9618  | 7308 | 5798 |
| NM_009378 | Thbd          | -2.343 | -2.486 | 708  | 761  | 5785  | 1163  | 282  | 63   |
| NM_021474 | Efemp2        | -2.342 | -5.462 | 994  | 3289 | 6460  | 698   | 340  | 253  |
| NM_026316 | Aldh3b1       | -2.338 | -3.147 | 993  | 1293 | 2446  | 717   | 595  | 289  |
| NM_010180 | Fbln1         | -2.338 | -2.822 | 2343 | 2433 | 4509  | 3321  | 3956 | 2525 |
| NM_007825 | Cyp7b1        | -2.334 | -2.526 | 1420 | 1729 | 1777  | 4788  | 3845 | 3412 |
| NM_145379 | Mrgprf        | -2.329 | -5.206 | 335  | 1741 | 3326  | 631   | 199  | 117  |
| NM_010728 | Lox           | -2.322 | -7.557 | 2063 | 5711 | 10692 | 1867  | 569  | 1141 |
| NM_027878 | 1200002N14Rik | -2.316 | -4.623 | 1377 | 3692 | 3857  | 2561  | 1546 | 1103 |
| NM_009252 | Serpina3n     | -2.314 | -4.580 | 101  | 86   | 547   | 605   | 159  | 51   |
| NM_010764 | Man2b1        | -2.308 | -1.925 | 2653 | 1802 | 3266  | 378   | 388  | 416  |
| NM_176830 | 1110036O03Rik | -2.305 | -3.500 | 2760 | 4657 | 8460  | 1446  | 293  | 196  |
| NM_010222 | Fkbp7         | -2.290 | -3.819 | 181  | 2683 | 2187  | 341   | 291  | 276  |
| NM_023699 | Nfatc4        | -2.265 | -1.866 | 1669 | 2198 | 6153  | 869   | 1099 | 400  |
| NM_008416 | Junb          | -2.250 | -3.171 | 7372 | 5653 | 11372 | 202   | 88   | 48   |
| NM_019861 | Ctsf          | -2.247 | -1.617 | 883  | 1075 | 2594  | 572   | 716  | 229  |
| NM_011435 | Sod3          | -2.244 | -2.695 | 974  | 249  | 1261  | 1232  | 498  | 81   |
| NM_010708 | Lgals9        | -2.238 | -2.842 | 1180 | 2124 | 4510  | 896   | 1622 | 575  |
| NM_008369 | Il3ra         | -2.209 | -2.789 | 2268 | 2177 | 2374  | 422   | 372  | 273  |
| NM_010906 | Nfix          | -2.207 | -5.676 | 6547 | 7244 | 19711 | 20904 | 2933 | 2462 |
| NM_009099 | Trim30        | -2.193 | -2.341 | 116  | 594  | 612   | 925   | 540  | 402  |
| NM_009930 | Col3a1        | -2.189 | -4.348 | 120  | 8263 | 5764  | 1051  | 557  | 1025 |
| NM_008640 | Laptm4a       | -2.188 | -1.039 | 4019 | 6044 | 3090  | 328   | 364  | 272  |
| NM_011909 | Usp18         | -2.187 | -4.447 | 714  | 5053 | 2362  | 2012  | 921  | 726  |
| NM_010741 | Ly6c1         | -2.183 | -3.732 | 20   | 144  | 124   | 110   | 186  | 122  |
| NM_019449 | Unc93b1       | -2.172 | -2.527 | 1837 | 2962 | 4373  | 1071  | 562  | 277  |
| NM_175168 | Ptk7          | -2.160 | -1.302 | 6489 | 2365 | 7316  | 2142  | 8202 | 1500 |
| NM_007802 | Ctsk          | -2.158 | -5.848 | 56   | 1641 | 1468  | 308   | 310  | 197  |
| NM_011333 | Ccl2          | -2.147 | -4.148 | 23   | 1162 | 501   | 205   | 170  | 57   |

|           |             |        |        |      |      |       |       |       |       |
|-----------|-------------|--------|--------|------|------|-------|-------|-------|-------|
| NM_009255 | Serpine2    | -2.147 | -3.015 | 2623 | 3241 | 4414  | 2380  | 1979  | 1831  |
| NM_029758 | D12Ertd553e | -2.146 | -1.363 | 909  | 668  | 842   | 2980  | 2975  | 1641  |
| NM_009325 | Tbxa2r      | -2.141 | -1.978 | 1785 | 176  | 1578  | 924   | 429   | 109   |
| NM_008764 | Tnfrsf11b   | -2.140 | -4.946 | 215  | 1049 | 1370  | 1037  | 1333  | 1231  |
| NM_145158 | Emilin2     | -2.137 | -4.713 | 2841 | 3085 | 4111  | 4343  | 4917  | 1847  |
| NM_007987 | Fas         | -2.136 | -2.503 | 353  | 1921 | 2902  | 1802  | 1079  | 1380  |
| NM_019922 | Crtap       | -2.099 | -2.341 | 3796 | 2715 | 4053  | 270   | 292   | 209   |
| NM_146041 | Gmcs        | -2.095 | -2.303 | 3944 | 6429 | 8533  | 13787 | 13592 | 16811 |
| NM_145978 | Pdlim2      | -2.093 | -2.723 | 1545 | 2496 | 4901  | 1863  | 261   | 559   |
| NM_020561 | Smpdl3a     | -2.091 | -4.299 | 862  | 1564 | 1205  | 1204  | 422   | 529   |
| NM_030209 | Crispld2    | -2.086 | -2.287 | 1256 | 369  | 3311  | 3933  | 1773  | 3163  |
| NM_009641 | Angpt4      | -2.066 | -3.479 | 704  | 887  | 2679  | 2261  | 736   | 977   |
| NM_030127 | Htra3       | -2.063 | -2.896 | 2516 | 531  | 1912  | 2832  | 1308  | 807   |
| NM_134090 | Kdelr3      | -2.059 | -2.237 | 2345 | 4877 | 7746  | 811   | 1052  | 320   |
| NM_130451 | Slc2a10     | -2.046 | -2.995 | 533  | 1405 | 3500  | 1536  | 986   | 219   |
| NM_173743 | BC020489    | -2.033 | -3.059 | 14   | 35   | 30    | 156   | 212   | 40    |
| NM_008885 | Pmp22       | -2.033 | -3.863 | 2131 | 5293 | 10179 | 3825  | 850   | 803   |
| NM_172294 | Sulf1       | -2.032 | -3.823 | 1362 | 1953 | 3804  | 5287  | 4386  | 3955  |
| NM_009636 | Aebp1       | -2.017 | -6.142 | 1494 | 4769 | 8027  | 1683  | 203   | 263   |
| NM_030749 | Sil1        | -2.012 | -1.989 | 3940 | 3423 | 3840  | 8345  | 5922  | 7205  |
| NM_019656 | Tspan6      | -2.004 | -3.352 | 579  | 799  | 1608  | 225   | 90    | 86    |
| NM_010511 | Ifngr1      | -1.998 | -3.625 | 1602 | 3207 | 4027  | 834   | 590   | 557   |
| NM_008183 | Gstm2       | -1.985 | -1.581 | 84   | 499  | 660   | 211   | 645   | 45    |
| NM_011838 | Lynx1       | -1.983 | -2.821 | 862  | 1048 | 2655  | 752   | 419   | 244   |
| NM_011406 | Slc8a1      | -1.967 | -2.494 | 3195 | 5327 | 6784  | 12324 | 12196 | 14290 |
| NM_018734 | Gbp3        | -1.965 | -3.561 | 145  | 824  | 772   | 467   | 210   | 294   |
| NM_026960 | Gsdmd       | -1.963 | -1.887 | 249  | 650  | 2199  | 442   | 582   | 145   |
| NM_019959 | C1qtnf1     | -1.957 | -2.365 | 381  | 188  | 292   | 1343  | 965   | 341   |
| NM_024249 | ---         | -1.956 | -2.407 | 3808 | 4877 | 6936  | 1363  | 1104  | 1301  |

|           |               |        |        |      |       |       |      |      |      |
|-----------|---------------|--------|--------|------|-------|-------|------|------|------|
| NM_021528 | Chst12        | -1.954 | -2.258 | 2422 | 3558  | 6735  | 548  | 567  | 309  |
| NM_009144 | Sfrp2         | -1.952 | -1.974 | 1624 | 191   | 2515  | 1707 | 706  | 602  |
| NM_173047 | Cbr3          | -1.952 | -1.519 | 1628 | 2676  | 4063  | 1251 | 945  | 626  |
| NM_145394 | Slc44a3       | -1.949 | -1.115 | 1607 | 1463  | 2764  | 3166 | 3963 | 984  |
| NM_008675 | Nbl1          | -1.943 | -3.603 | 1604 | 1928  | 3964  | 2112 | 904  | 223  |
| NM_011427 | Snai1         | -1.933 | -2.319 | 1021 | 4440  | 11302 | 1448 | 113  | 50   |
| NM_007743 | Col1a2        | -1.930 | -4.666 | 450  | 10866 | 8000  | 2374 | 803  | 1380 |
| NM_028181 | Ccpg1         | -1.926 | -2.197 | 3886 | 2703  | 3830  | 647  | 687  | 795  |
| NM_153573 | Fkbp14        | -1.922 | -3.340 | 437  | 3398  | 3140  | 539  | 608  | 356  |
| NM_053108 | Glrx          | -1.910 | -3.015 | 395  | 2335  | 3373  | 344  | 179  | 225  |
| NM_026772 | Cdc42ep2      | -1.903 | -2.752 | 45   | 20    | 45    | 65   | 84   | 48   |
| NM_175149 | 2310022B05Rik | -1.876 | -3.196 | 2227 | 4923  | 7583  | 834  | 544  | 603  |
| NM_139307 | Vasn          | -1.871 | -3.329 | 1480 | 3748  | 11079 | 519  | 338  | 253  |
| NM_028778 | Nuak2         | -1.865 | -2.121 | 1761 | 2545  | 4062  | 1616 | 1748 | 505  |
| NM_011756 | Zfp36         | -1.864 | -2.495 | 3876 | 6613  | 5294  | 146  | 42   | 43   |
| NM_008483 | Lamb2         | -1.847 | -2.971 | 2360 | 3483  | 5383  | 451  | 280  | 195  |
| NM_201641 | Ugt1a9        | -1.842 | -5.080 | 1232 | 2475  | 2689  | 7762 | 4842 | 7170 |
| NM_173371 | H6pd          | -1.841 | -3.265 | 2588 | 3106  | 5071  | 1517 | 822  | 468  |
| NM_011173 | Pros1         | -1.839 | -3.685 | 1877 | 3850  | 4403  | 1867 | 1482 | 1686 |
| NM_013534 | Leprel2       | -1.836 | -3.569 | 2277 | 2978  | 3537  | 1064 | 2476 | 318  |
| NM_025360 | Tmed3         | -1.828 | -3.727 | 1108 | 2514  | 3322  | 330  | 214  | 165  |
| NM_009318 | Tapbp         | -1.822 | -1.660 | 3372 | 6701  | 5800  | 350  | 444  | 133  |
| NM_028351 | Rspo3         | -1.818 | -2.172 | 1390 | 1943  | 4634  | 3341 | 2382 | 4824 |
| NM_033602 | Peli2         | -1.817 | -2.397 | 4447 | 6031  | 8542  | 5342 | 3552 | 3313 |
| NM_197999 | 2210023G05Rik | -1.816 | -2.203 | 20   | 47    | 82    | 312  | 257  | 200  |
| NM_022415 | Ptges         | -1.804 | -1.971 | 540  | 511   | 4966  | 688  | 852  | 246  |
| NM_015786 | Hist1h1c      | -1.800 | -4.720 | 1788 | 1890  | 2856  | 45   | 32   | 40   |
| NM_011723 | Xdh           | -1.780 | -4.549 | 433  | 3561  | 4513  | 2991 | 2402 | 2018 |
| NM_011594 | Timp2         | -1.779 | -5.168 | 3041 | 6807  | 8490  | 4346 | 1434 | 1060 |

|              |          |        |        |      |      |       |       |      |      |
|--------------|----------|--------|--------|------|------|-------|-------|------|------|
| NM_012043    | Islr     | -1.774 | -1.758 | 167  | 124  | 4082  | 613   | 268  | 177  |
| NM_011530    | Tap2     | -1.770 | -1.852 | 1439 | 2391 | 3976  | 1250  | 970  | 254  |
| NM_023738    | Ube1l    | -1.767 | -3.997 | 283  | 1346 | 2551  | 869   | 228  | 312  |
| NM_130449    | Colec12  | -1.766 | -2.460 | 3408 | 3621 | 6109  | 4883  | 2742 | 4228 |
| NM_027455    | Qpct     | -1.759 | -3.407 | 3453 | 2539 | 2992  | 2078  | 1588 | 1664 |
| NM_029537    | Tmem98   | -1.755 | -2.587 | 1312 | 1249 | 2287  | 923   | 923  | 297  |
| NM_008321    | Id3      | -1.750 | -1.172 | 6082 | 3894 | 4156  | 942   | 17   | 29   |
| NM_009976    | Cst3     | -1.729 | -2.351 | 3749 | 5452 | 5078  | 142   | 92   | 71   |
| NM_028472    | Bmper    | -1.728 | -3.217 | 3986 | 3211 | 6079  | 9328  | 7388 | 8727 |
| NM_178697    | Clca5    | -1.727 | -1.919 | 141  | 149  | 247   | 861   | 1115 | 411  |
| NM_023056    | Tmem176b | -1.725 | -5.395 | 171  | 2319 | 4129  | 823   | 393  | 128  |
| NM_013792    | Naglu    | -1.722 | -2.886 | 3012 | 2583 | 3838  | 1567  | 136  | 201  |
| NM_009062    | Rgs4     | -1.719 | -1.694 | 82   | 202  | 956   | 485   | 355  | 476  |
| NM_019978    | Dclk1    | -1.719 | -2.724 | 2194 | 4491 | 5059  | 12514 | 7611 | 4404 |
| NM_019631    | Tmem45a  | -1.716 | -2.271 | 993  | 2645 | 4168  | 2227  | 1446 | 2274 |
| NM_026555    | Rcn3     | -1.704 | -1.663 | 830  | 2657 | 1947  | 266   | 317  | 145  |
| NM_008520    | Ltbp3    | -1.698 | -4.011 | 3394 | 3564 | 5696  | 3989  | 499  | 365  |
| NM_011416    | Smarca2  | -1.696 | -3.584 | 7359 | 9866 | 13087 | 9517  | 5064 | 4875 |
| NM_178600    | Vkorc1   | -1.689 | -1.520 | 1976 | 1908 | 1993  | 80    | 130  | 30   |
| NM_199307    | Ece1     | -1.689 | -1.622 | 4548 | 3901 | 7011  | 4333  | 6451 | 1032 |
| NM_134154    | Slc25a45 | -1.682 | -2.718 | 178  | 305  | 1826  | 345   | 180  | 126  |
| NM_011341    | Sdf4     | -1.677 | -2.347 | 6963 | 4488 | 3212  | 451   | 420  | 177  |
| NM_001001488 | Atp8b1   | -1.662 | -4.183 | 3262 | 5180 | 8409  | 6609  | 3838 | 3462 |
| NM_033354    | Sec16b   | -1.658 | -2.649 | 559  | 1148 | 1781  | 2943  | 2353 | 1495 |
| NM_021384    | Rsad2    | -1.656 | -2.337 | 130  | 377  | 420   | 573   | 501  | 297  |
| NM_019456    | Apbb1ip  | -1.653 | -3.692 | 661  | 4037 | 5043  | 4584  | 1967 | 2415 |
| NM_024198    | Gpx7     | -1.639 | -2.322 | 2208 | 2587 | 2177  | 409   | 667  | 213  |
| NM_018750    | Rassf5   | -1.625 | -3.135 | 4439 | 3409 | 7140  | 5360  | 3846 | 1573 |
| NM_022325    | Ctsz     | -1.622 | -2.865 | 1917 | 2611 | 3460  | 261   | 194  | 186  |



|              |            |        |        |      |      |       |      |      |      |
|--------------|------------|--------|--------|------|------|-------|------|------|------|
| NM_010551    | Il16       | -1.617 | -1.746 | 649  | 463  | 882   | 3493 | 3164 | 1267 |
| NM_019877    | Copz2      | -1.614 | -2.369 | 1389 | 2873 | 4960  | 1031 | 477  | 279  |
| NM_007833    | Dcn        | -1.613 | -5.174 | 79   | 1048 | 611   | 901  | 766  | 1171 |
| NM_012032    | Serinc3    | -1.611 | -1.155 | 2109 | 3889 | 3275  | 262  | 366  | 438  |
| NM_009120    | Sar1a      | -1.609 | -2.422 | 2563 | 5364 | 4715  | 315  | 471  | 400  |
| NM_008809    | Pdgfrb     | -1.609 | -3.891 | 793  | 7089 | 11612 | 4213 | 1340 | 1947 |
| NM_133718    | Tmem30a    | -1.602 | -1.896 | 3555 | 3855 | 4206  | 480  | 564  | 612  |
| NM_028841    | Tspan17    | -1.594 | -1.820 | 1119 | 1504 | 2824  | 626  | 267  | 145  |
| NM_026405    | Rab32      | -1.579 | -4.560 | 2057 | 3403 | 3799  | 1020 | 394  | 443  |
| NM_027870    | Armcx3     | -1.576 | -3.286 | 471  | 2128 | 2353  | 202  | 57   | 34   |
| NM_010221    | Fkbp10     | -1.570 | -3.171 | 1387 | 3073 | 6349  | 1402 | 589  | 203  |
| NM_175274    | Ttyh3      | -1.562 | -4.177 | 1870 | 4188 | 7875  | 1481 | 781  | 620  |
| NM_001042489 | Hvcn1      | -1.559 | -1.055 | 792  | 726  | 1377  | 663  | 1978 | 457  |
| NM_146136    | Slc16a4    | -1.553 | -1.805 | 42   | 178  | 129   | 287  | 544  | 252  |
| NM_025429    | Serpinb1a  | -1.552 | -2.266 | 88   | 318  | 493   | 307  | 321  | 315  |
| NM_010421    | Hexa       | -1.551 | -1.923 | 3061 | 5003 | 5475  | 696  | 418  | 382  |
| NM_024263    | Mxra8      | -1.542 | -3.894 | 2810 | 5085 | 3826  | 869  | 272  | 63   |
| NM_029600    | Abcc3      | -1.535 | -2.202 | 1024 | 993  | 1973  | 5475 | 4654 | 2017 |
| NM_054041    | Antxr1     | -1.533 | -3.914 | 2759 | 7919 | 9030  | 9226 | 7740 | 4406 |
| NM_153782    | ---        | -1.531 | -4.251 | 1789 | 5589 | 8064  | 4408 | 1454 | 1294 |
| NM_178939    | Pdrg1      | -1.528 | -2.167 | 3887 | 2656 | 4656  | 220  | 226  | 273  |
| NM_008047    | Fstl1      | -1.527 | -3.144 | 2275 | 5441 | 6638  | 1574 | 2706 | 1372 |
| NM_153513    | BC028528   | -1.527 | -1.813 | 207  | 655  | 634   | 189  | 461  | 121  |
| NM_009283    | Stat1      | -1.524 | -1.904 | 2647 | 4324 | 4459  | 2111 | 908  | 994  |
| NM_013819    | H2-M3      | -1.521 | -2.010 | 975  | 1434 | 2887  | 584  | 131  | 139  |
| NM_008967    | Ptgir      | -1.518 | -2.153 | 1194 | 81   | 1085  | 850  | 140  | 38   |
| NM_010924    | Nnmt       | -1.505 | -5.378 | 146  | 2098 | 3208  | 703  | 317  | 270  |
| NM_011030    | P4ha1      | -1.500 | -2.488 | 1823 | 5504 | 4913  | 1381 | 1376 | 1334 |
| NM_013549    | Hist2h2aa1 | -1.499 | -3.149 | 106  | 268  | 162   | 17   | 10   | 10   |

|              |               |        |        |       |       |       |       |       |       |
|--------------|---------------|--------|--------|-------|-------|-------|-------|-------|-------|
| NM_144786    | Ggtl3         | -1.499 | -3.016 | 565   | 1164  | 2994  | 1618  | 1189  | 723   |
| NM_010580    | Itgb5         | -1.486 | -2.833 | 5869  | 6326  | 8152  | 3281  | 2949  | 3602  |
| NM_001037865 | Col28a1       | -1.484 | -3.456 | 548   | 2637  | 1365  | 5706  | 5786  | 6008  |
| NM_133733    | 9030425E11Rik | -1.484 | -1.259 | 4796  | 3419  | 7923  | 4995  | 4938  | 3020  |
| NM_008330    | Ifi47         | -1.479 | -2.005 | 300   | 234   | 339   | 841   | 420   | 226   |
| NM_021606    | Nek6          | -1.479 | -2.181 | 4165  | 4711  | 5919  | 2318  | 1610  | 1329  |
| NM_013683    | Tap1          | -1.471 | -1.141 | 2577  | 2170  | 5966  | 1897  | 1044  | 225   |
| NM_201367    | Gpr176        | -1.467 | -5.358 | 2458  | 3442  | 5907  | 5815  | 3514  | 2528  |
| NM_007855    | Twist2        | -1.466 | -4.364 | 2797  | 6582  | 13177 | 4611  | 2941  | 2057  |
| NM_010934    | Npy1r         | -1.461 | -2.074 | 148   | 709   | 1140  | 954   | 684   | 364   |
| NM_181277    | Col14a1       | -1.458 | -1.539 | 2120  | 3767  | 4409  | 11015 | 8904  | 8037  |
| NM_013642    | Dusp1         | -1.457 | -1.017 | 8876  | 8710  | 9633  | 339   | 238   | 103   |
| NM_146120    | Gsn           | -1.456 | -1.477 | 839   | 284   | 809   | 2036  | 533   | 539   |
| NM_175425    | C1qtnf7       | -1.455 | -1.519 | 40    | 145   | 49    | 537   | 516   | 376   |
| NM_007874    | Reep5         | -1.455 | -4.364 | 4013  | 5362  | 5823  | 1162  | 520   | 658   |
| NM_010212    | Fhl2          | -1.454 | -3.921 | 1789  | 4175  | 5706  | 2999  | 1309  | 1178  |
| NM_010479    | Hspa1a        | -1.450 | -2.298 | 164   | 342   | 119   | 275   | 84    | 41    |
| NM_010581    | Cd47          | -1.448 | -4.303 | 3537  | 7841  | 7237  | 2026  | 1362  | 1282  |
| NM_026160    | Map1lc3b      | -1.447 | -1.887 | 3186  | 3660  | 5422  | 200   | 206   | 214   |
| NM_173008    | A430110N23Rik | -1.446 | -1.797 | 348   | 541   | 2362  | 894   | 557   | 285   |
| NM_194069    | ---           | -1.432 | -5.186 | 58    | 1933  | 1020  | 406   | 273   | 57    |
| NM_013646    | Rora          | -1.427 | -2.286 | 12187 | 13177 | 21347 | 28251 | 18532 | 17250 |
| NM_175401    | Fbxw17        | -1.421 | -1.722 | 2524  | 2943  | 3125  | 239   | 308   | 398   |
| NM_008175    | Grn           | -1.419 | -1.510 | 3589  | 3559  | 5719  | 299   | 136   | 122   |
| NM_145418    | BC013529      | -1.414 | -3.023 | 2265  | 2860  | 3357  | 477   | 407   | 383   |
| NM_007547    | Sirpa         | -1.403 | -3.216 | 3707  | 3595  | 7827  | 2669  | 893   | 854   |
| NM_010095    | Ebf2          | -1.402 | -1.143 | 2843  | 2398  | 6323  | 13568 | 14410 | 12175 |
| NM_023386    | Rtp4          | -1.400 | -1.932 | 72    | 2612  | 2149  | 336   | 119   | 166   |
| NM_016744    | Pde1a         | -1.400 | -3.275 | 693   | 2615  | 5414  | 7326  | 5420  | 9034  |

|           |               |        |        |      |      |       |       |       |      |
|-----------|---------------|--------|--------|------|------|-------|-------|-------|------|
| NM_010729 | Loxl1         | -1.392 | -5.350 | 3194 | 9328 | 10920 | 2036  | 864   | 1068 |
| NM_007656 | Cd82          | -1.391 | -2.233 | 1595 | 1232 | 2991  | 3881  | 1247  | 1051 |
| NM_031257 | Plekha2       | -1.391 | -1.151 | 2302 | 4473 | 5146  | 2172  | 2383  | 950  |
| NM_025760 | Ptplad2       | -1.390 | -1.999 | 151  | 862  | 974   | 684   | 545   | 415  |
| NM_029935 | 4631426J05Rik | -1.384 | -1.551 | 5723 | 2486 | 5413  | 5822  | 3845  | 981  |
| NM_021460 | Lipa          | -1.381 | -4.264 | 1274 | 3669 | 3755  | 844   | 805   | 810  |
| NM_010424 | Hfe           | -1.379 | -2.033 | 127  | 1260 | 1340  | 777   | 296   | 265  |
| NM_016850 | Irf7          | -1.376 | -1.843 | 128  | 1400 | 1020  | 175   | 84    | 22   |
| NM_021434 | Gpr180        | -1.373 | -1.773 | 2167 | 2277 | 4057  | 818   | 444   | 514  |
| NM_011512 | Surf4         | -1.369 | -2.257 | 4258 | 5248 | 6027  | 275   | 476   | 423  |
| NM_027519 | 6330406I15Rik | -1.364 | -4.332 | 831  | 6551 | 8063  | 1920  | 1125  | 433  |
| NM_010376 | H13           | -1.361 | -1.623 | 6853 | 6893 | 10058 | 979   | 754   | 705  |
| NM_007736 | Col4a5        | -1.358 | -3.828 | 300  | 1921 | 1942  | 2625  | 2776  | 2406 |
| NM_144875 | Rab7l1        | -1.348 | -2.122 | 1974 | 2004 | 3647  | 258   | 301   | 152  |
| NM_133918 | Emilin1       | -1.343 | -2.775 | 1122 | 3541 | 6016  | 413   | 252   | 66   |
| NM_013846 | Ror2          | -1.340 | -1.180 | 6849 | 3703 | 8327  | 8074  | 7114  | 6387 |
| NM_019802 | Ggcx          | -1.333 | -3.772 | 2086 | 4738 | 3213  | 443   | 686   | 263  |
| NM_080456 | Mrps6         | -1.329 | -2.831 | 4233 | 4961 | 6884  | 1558  | 1231  | 1479 |
| NM_026353 | 4930570C03Rik | -1.325 | -2.957 | 2427 | 3091 | 3953  | 549   | 340   | 182  |
| NM_010234 | Fos           | -1.320 | -1.608 | 4823 | 6095 | 4430  | 864   | 129   | 103  |
| NM_134065 | Epdr1         | -1.319 | -5.084 | 2374 | 3647 | 4214  | 1059  | 487   | 767  |
| NM_009933 | Col6a1        | -1.317 | -6.821 | 325  | 5015 | 6205  | 1012  | 624   | 558  |
| NM_139300 | Mylk          | -1.315 | -1.388 | 2002 | 1712 | 2334  | 11455 | 10352 | 8874 |
| NM_020559 | Alas1         | -1.310 | -2.131 | 2662 | 2742 | 4237  | 611   | 132   | 267  |
| NM_009712 | Arsb          | -1.308 | -4.607 | 2233 | 3953 | 4809  | 7748  | 4058  | 4320 |
| NM_053139 | Pcdhb14       | -1.304 | -2.057 | 81   | 224  | 370   | 676   | 100   | 181  |
| NM_009713 | Arsa          | -1.295 | -2.144 | 2192 | 3400 | 4089  | 451   | 130   | 162  |
| NM_145466 | BC006662      | -1.294 | -1.489 | 2580 | 2027 | 3048  | 886   | 551   | 729  |
| NM_172416 | Ostm1         | -1.290 | -1.974 | 4326 | 4235 | 4893  | 539   | 563   | 741  |

|           |               |        |        |      |      |       |      |      |      |
|-----------|---------------|--------|--------|------|------|-------|------|------|------|
| NM_153560 | C230093N12Rik | -1.287 | -1.289 | 4309 | 4755 | 6684  | 1127 | 486  | 683  |
| NM_028862 | Rnf145        | -1.279 | -1.857 | 4511 | 5980 | 7202  | 1235 | 1085 | 1405 |
| NM_007730 | Col12a1       | -1.277 | -5.317 | 1055 | 3512 | 6704  | 4473 | 2264 | 3107 |
| NM_013673 | Sp100         | -1.274 | -1.015 | 282  | 476  | 484   | 1722 | 1287 | 1288 |
| NM_010336 | Edg2          | -1.273 | -2.627 | 3793 | 5475 | 4820  | 3934 | 2642 | 2113 |
| NM_010332 | Ednra         | -1.273 | -5.652 | 952  | 2104 | 4113  | 2315 | 1573 | 1716 |
| NM_025378 | Ifitm3        | -1.268 | -1.726 | 990  | 1974 | 1672  | 32   | 72   | 13   |
| NM_198626 | AI480653      | -1.267 | -1.179 | 5565 | 3194 | 4743  | 3941 | 3956 | 3199 |
| NM_021507 | Sqrdl         | -1.267 | -2.468 | 71   | 112  | 215   | 944  | 430  | 660  |
| NM_026908 | Cab39l        | -1.266 | -1.216 | 3328 | 3875 | 6035  | 2309 | 2484 | 2820 |
| NM_011817 | Gadd45g       | -1.261 | -2.073 | 6805 | 7520 | 10187 | 569  | 60   | 81   |
| NM_013606 | Mx2           | -1.248 | -2.283 | 200  | 749  | 802   | 993  | 831  | 575  |
| NM_026174 | Entpd4        | -1.248 | -2.115 | 3132 | 2902 | 3341  | 3059 | 869  | 1250 |
| NM_010851 | Myd88         | -1.243 | -2.231 | 1243 | 3592 | 4645  | 399  | 166  | 95   |
| NM_007898 | Ebp           | -1.241 | -1.325 | 1522 | 1913 | 2585  | 78   | 49   | 55   |
| NM_025295 | Btd           | -1.238 | -1.950 | 3307 | 3888 | 3815  | 1139 | 634  | 656  |
| NM_025827 | Lonp2         | -1.236 | -1.497 | 3069 | 4187 | 6982  | 1444 | 1870 | 2740 |
| NM_007471 | App           | -1.234 | -4.807 | 8267 | 8254 | 11354 | 9070 | 4835 | 5504 |
| NM_177614 | Os9           | -1.234 | -3.432 | 3201 | 4212 | 3995  | 1129 | 895  | 638  |
| NM_174995 | Mgst2         | -1.232 | -2.096 | 238  | 225  | 567   | 1232 | 674  | 288  |
| NM_009074 | Mst1r         | -1.231 | -1.298 | 1060 | 308  | 3153  | 1777 | 1526 | 627  |
| NM_172893 | Parp12        | -1.230 | -1.315 | 4211 | 6547 | 6472  | 2007 | 1606 | 856  |
| NM_018869 | Grk5          | -1.229 | -2.139 | 4751 | 4672 | 6892  | 6212 | 4741 | 4577 |
| NM_178406 | Gpr153        | -1.227 | -2.760 | 3108 | 2340 | 2358  | 2661 | 451  | 514  |
| NM_010560 | Il6st         | -1.221 | -1.329 | 4587 | 8406 | 6836  | 791  | 1148 | 1042 |
| NM_027320 | Ifi35         | -1.216 | -1.576 | 179  | 1697 | 1957  | 298  | 174  | 250  |
| NM_008850 | Pitpna        | -1.216 | -1.163 | 5235 | 3246 | 5562  | 1113 | 796  | 866  |
| NM_028375 | Cxx1c         | -1.215 | -2.066 | 72   | 976  | 1681  | 84   | 10   | 24   |
| NM_178141 | 3830406C13Rik | -1.208 | -2.320 | 2056 | 2458 | 3201  | 606  | 550  | 610  |

|           |               |        |        |      |      |       |      |       |      |
|-----------|---------------|--------|--------|------|------|-------|------|-------|------|
| NM_016846 | Rgl1          | -1.203 | -3.367 | 2246 | 5116 | 6922  | 6445 | 3044  | 2733 |
| NM_175400 | Sephs1        | -1.197 | -1.574 | 4043 | 3353 | 4502  | 449  | 533   | 517  |
| NM_027127 | 2310016C16Rik | -1.195 | -3.778 | 136  | 4021 | 2493  | 464  | 146   | 226  |
| NM_177260 | Tmem154       | -1.192 | -1.570 | 361  | 404  | 913   | 2346 | 1424  | 668  |
| NM_009890 | Ch25h         | -1.191 | -4.470 | 718  | 3630 | 4105  | 762  | 342   | 197  |
| NM_009382 | Thy1          | -1.190 | -5.917 | 657  | 4438 | 7658  | 1132 | 415   | 143  |
| NM_147220 | Abca9         | -1.185 | -1.246 | 308  | 690  | 1142  | 2595 | 1558  | 2625 |
| NM_023422 | Hist1h2bc     | -1.185 | -3.375 | 574  | 3995 | 2901  | 189  | 221   | 285  |
| NM_013796 | Nagpa         | -1.185 | -1.855 | 3817 | 2235 | 3892  | 420  | 186   | 176  |
| NM_173006 | Pon3          | -1.179 | -1.950 | 296  | 1591 | 1851  | 1159 | 834   | 918  |
| NM_176996 | Smo           | -1.178 | -2.010 | 3501 | 4007 | 6769  | 2724 | 3027  | 1071 |
| NM_025785 | Fbxo25        | -1.177 | -1.549 | 3197 | 3155 | 5531  | 869  | 1141  | 1212 |
| NM_025516 | Ergic3        | -1.177 | -1.707 | 3380 | 2516 | 3304  | 295  | 319   | 286  |
| NM_011962 | Plod3         | -1.173 | -2.977 | 3301 | 4325 | 5885  | 363  | 208   | 181  |
| NM_029364 | Gns           | -1.173 | -4.064 | 3698 | 7220 | 5005  | 1083 | 1002  | 745  |
| NM_025661 | Ormdl3        | -1.173 | -1.701 | 2223 | 2951 | 3583  | 250  | 305   | 294  |
| NM_153778 | Atoh8         | -1.171 | -1.175 | 3396 | 1033 | 9352  | 5476 | 12997 | 770  |
| NM_008150 | Gpc4          | -1.170 | -1.934 | 4045 | 3642 | 5175  | 1491 | 1343  | 1538 |
| NM_016678 | Reck          | -1.169 | -1.763 | 3923 | 2880 | 2948  | 2887 | 1797  | 983  |
| NM_133967 | Zdhhc7        | -1.167 | -1.827 | 3701 | 4284 | 8397  | 751  | 487   | 501  |
| NM_010422 | Hexb          | -1.159 | -1.293 | 3646 | 2413 | 2857  | 800  | 611   | 633  |
| NM_007993 | Fbn1          | -1.155 | -5.092 | 3284 | 7252 | 13263 | 7540 | 6263  | 4398 |
| NM_026436 | Tmem86a       | -1.146 | -2.782 | 1629 | 2921 | 1936  | 604  | 129   | 25   |
| NM_172604 | Scara3        | -1.145 | -2.976 | 1278 | 661  | 1305  | 2819 | 2719  | 3685 |
| NM_013476 | Ar            | -1.143 | -2.111 | 759  | 3336 | 5762  | 3445 | 2128  | 2187 |
| NM_027868 | Slc41a3       | -1.140 | -1.487 | 1416 | 2622 | 2311  | 2661 | 5742  | 1184 |
| NM_027122 | Mfsd3         | -1.136 | -1.327 | 2232 | 1731 | 3092  | 117  | 65    | 77   |
| NM_022813 | Scamp2        | -1.133 | -1.031 | 2141 | 2519 | 3545  | 694  | 511   | 508  |
| NM_027817 | Grap          | -1.125 | -1.039 | 651  | 289  | 1116  | 2636 | 1563  | 616  |

|              |               |        |        |       |       |       |       |       |       |
|--------------|---------------|--------|--------|-------|-------|-------|-------|-------|-------|
| NM_178762    | A930025D01Rik | -1.120 | -1.440 | 4485  | 4075  | 5125  | 555   | 109   | 198   |
| NM_009883    | Cebpb         | -1.118 | -2.984 | 5640  | 4370  | 5017  | 235   | 121   | 37    |
| NM_025858    | Scotin        | -1.114 | -2.781 | 2634  | 4439  | 6896  | 479   | 326   | 193   |
| NM_016923    | Ly96          | -1.113 | -3.411 | 329   | 2773  | 2065  | 841   | 713   | 622   |
| NM_026554    | Ncbp2         | -1.112 | -1.044 | 6035  | 4932  | 5488  | 163   | 266   | 341   |
| NM_026721    | Slc39a13      | -1.110 | -3.108 | 2856  | 4088  | 5878  | 305   | 194   | 207   |
| NM_010427    | Hgf           | -1.109 | -1.960 | 118   | 2064  | 2267  | 1894  | 1541  | 917   |
| NM_010684    | Lamp1         | -1.102 | -2.729 | 4652  | 6005  | 7123  | 515   | 653   | 661   |
| NM_008719    | Npas2         | -1.101 | -1.190 | 4373  | 2565  | 6230  | 10630 | 6700  | 4787  |
| NM_011693    | Vcam1         | -1.095 | -4.147 | 105   | 4792  | 1824  | 836   | 348   | 363   |
| NM_011957    | Creb3l1       | -1.094 | -1.566 | 3106  | 4115  | 7886  | 3340  | 2581  | 956   |
| NM_177068    | Olfml2b       | -1.094 | -4.403 | 1533  | 3735  | 3399  | 2703  | 1035  | 1342  |
| NM_027995    | Paqr7         | -1.092 | -1.854 | 911   | 1475  | 1400  | 919   | 423   | 52    |
| NM_001024955 | Pik3r1        | -1.092 | -1.891 | 216   | 212   | 237   | 270   | 386   | 298   |
| NM_020557    | Tyki          | -1.091 | -1.520 | 2308  | 1525  | 1510  | 764   | 535   | 435   |
| NM_009761    | Bnip3l        | -1.090 | -1.221 | 3028  | 2999  | 3079  | 332   | 564   | 552   |
| NM_177909    | Slc9a9        | -1.087 | -1.667 | 2702  | 3939  | 6061  | 18532 | 14712 | 15505 |
| NM_009744    | Bcl6          | -1.087 | -1.828 | 2653  | 7691  | 7692  | 1933  | 351   | 535   |
| NM_022883    | Lpin3         | -1.086 | -1.224 | 1548  | 869   | 1107  | 1069  | 1028  | 545   |
| NM_145367    | Txndc5        | -1.084 | -2.554 | 2928  | 4774  | 5528  | 1007  | 765   | 677   |
| NM_018830    | Asah2         | -1.083 | -2.842 | 675   | 945   | 746   | 3248  | 3036  | 2785  |
| NM_032003    | Enpp5         | -1.083 | -2.414 | 453   | 1633  | 1402  | 439   | 405   | 387   |
| NM_178413    | Thnsl2        | -1.082 | -1.652 | 933   | 2652  | 2334  | 1033  | 1050  | 422   |
| NM_030262    | Pofut2        | -1.081 | -1.367 | 3884  | 4321  | 5781  | 349   | 225   | 310   |
| NM_029153    | Scamp1        | -1.080 | -1.105 | 4460  | 4142  | 5507  | 2213  | 1897  | 1953  |
| NM_080555    | Ppap2b        | -1.079 | -2.288 | 7139  | 10921 | 8567  | 2145  | 1695  | 937   |
| NM_139229    | Cog8          | -1.078 | -1.188 | 13575 | 9097  | 13257 | 294   | 250   | 383   |
| NM_001004363 | Nuak1         | -1.078 | -1.264 | 5220  | 7512  | 10694 | 2736  | 2050  | 1413  |
| NM_173751    | Ilvbl         | -1.073 | -2.962 | 2938  | 2708  | 3404  | 443   | 224   | 271   |

|           |          |        |        |      |       |       |       |      |      |
|-----------|----------|--------|--------|------|-------|-------|-------|------|------|
| NM_025828 | Lman2    | -1.072 | -1.428 | 5231 | 4338  | 5269  | 562   | 567  | 397  |
| NM_008410 | Itm2b    | -1.067 | -3.417 | 3336 | 5457  | 6434  | 643   | 380  | 570  |
| NM_026178 | Mmd      | -1.066 | -2.208 | 1952 | 3200  | 3617  | 2189  | 823  | 733  |
| NM_130796 | Snag1    | -1.066 | -1.412 | 5901 | 10242 | 16261 | 1453  | 492  | 477  |
| NM_028777 | Sec14l1  | -1.066 | -1.645 | 4727 | 4521  | 6559  | 1578  | 1239 | 763  |
| NM_010150 | Nr2f6    | -1.062 | -1.185 | 5514 | 5986  | 10454 | 1321  | 246  | 201  |
| NM_008606 | Mmp11    | -1.059 | -2.562 | 1687 | 6418  | 5258  | 712   | 359  | 274  |
| NM_009058 | Ralgds   | -1.058 | -1.097 | 5736 | 5929  | 9328  | 1402  | 1126 | 931  |
| NM_146211 | Glt25d1  | -1.057 | -1.676 | 4296 | 3792  | 5462  | 525   | 418  | 274  |
| NM_144916 | Tmem150  | -1.056 | -1.506 | 1707 | 3261  | 3536  | 291   | 215  | 135  |
| NM_010549 | Il11ra2  | -1.056 | -2.707 | 90   | 726   | 724   | 145   | 92   | 29   |
| NM_172769 | Sc5d     | -1.051 | -1.480 | 2031 | 3747  | 4024  | 375   | 248  | 318  |
| NM_177322 | Agtr1a   | -1.045 | -1.634 | 374  | 987   | 863   | 2005  | 1929 | 3234 |
| NM_145925 | Pttg1ip  | -1.044 | -1.331 | 3543 | 2593  | 3844  | 482   | 455  | 400  |
| NM_146067 | ---      | -1.044 | -1.507 | 2257 | 3051  | 3921  | 2510  | 2206 | 2446 |
| NM_133804 | Tmem132a | -1.044 | -2.100 | 2659 | 2005  | 3734  | 1067  | 567  | 254  |
| NM_126165 | Vps4a    | -1.040 | -1.460 | 3247 | 2965  | 5122  | 462   | 411  | 342  |
| NM_133847 | Tm9sf4   | -1.033 | -1.200 | 5437 | 4258  | 4566  | 1193  | 853  | 1002 |
| NM_025445 | Arfgap3  | -1.030 | -2.228 | 2216 | 4888  | 6274  | 1678  | 1580 | 1101 |
| NM_010096 | Ebf3     | -1.030 | -1.141 | 5130 | 2312  | 6471  | 11280 | 3948 | 1600 |
| NM_007986 | Fap      | -1.026 | -1.705 | 170  | 1452  | 1572  | 2509  | 1478 | 3295 |
| NM_024223 | Crip2    | -1.025 | -1.240 | 3448 | 2426  | 5223  | 915   | 373  | 96   |
| NM_175145 | Tmem127  | -1.025 | -2.241 | 5388 | 5218  | 7912  | 326   | 398  | 281  |
| NM_016796 | Vamp4    | -1.025 | -2.134 | 3116 | 4434  | 3695  | 774   | 667  | 845  |
| NM_010118 | Egr2     | -1.024 | -1.838 | 2548 | 2740  | 4708  | 1998  | 386  | 362  |
| NM_007752 | Cp       | -1.023 | -1.328 | 102  | 825   | 818   | 1342  | 781  | 674  |
| NM_008550 | Man2b2   | -1.012 | -2.876 | 1542 | 2256  | 2406  | 1175  | 831  | 278  |
| NM_019823 | Cyp2d22  | -1.001 | -2.227 | 98   | 185   | 107   | 504   | 229  | 129  |
| NM_025486 | Hspc171  | -1.001 | -1.173 | 4764 | 4312  | 5277  | 50    | 139  | 49   |
