# Supplementary material for: Identification of the early and late responder genes during the generation of induced pluripotent stem cells from mouse fibroblasts
Source: PubMed Central journal article supplement (PMC5289558; doi:10.1371/journal.pone.0171300), 2017-02-02
Supplement: pone.0171300.s012.pdf [file pone.0171300.s012.pdf]

**S6 Table. Resistant down genes**

| Gene information |             | mRNA fold change |            | H3K4me3 enrichment |       |       | H3K27me3 enrichment |       |       |
|------------------|-------------|------------------|------------|--------------------|-------|-------|---------------------|-------|-------|
| RefSeq gene      | gene symbol | iPSCp/sFB-G      | mESC/sFB-G | mESC               | iPSCp | sFB-G | mESC                | iPSCp | sFB-G |
| NM_007742        | Col1a1      | -0.691           | -7.483     | 825                | 8770  | 9809  | 2791                | 411   | 462   |
| NM_011581        | Thbs2       | 0.099            | -7.126     | 495                | 11257 | 6291  | 3452                | 1194  | 731   |
| NM_010656        | Sspn        | -0.362           | -5.491     | 770                | 2724  | 2129  | 1437                | 876   | 967   |
| NM_153543        | Aldh1l2     | 0.173            | -5.483     | 937                | 7691  | 3878  | 2636                | 1900  | 1397  |
| NM_053110        | Gpnmb       | -0.585           | -5.166     | 753                | 5061  | 5450  | 1357                | 1343  | 443   |
| NM_011340        | Serpinf1    | -0.878           | -5.136     | 234                | 3374  | 5430  | 839                 | 334   | 380   |
| NM_008608        | Mmp14       | -0.900           | -4.904     | 1239               | 9694  | 9861  | 1154                | 234   | 251   |
| NM_001081437     | Fbln2       | -0.057           | -4.765     | 1178               | 8640  | 11480 | 4107                | 2214  | 1141  |
| NM_007542        | Bgn         | -0.596           | -4.705     | 115                | 3783  | 4039  | 801                 | 448   | 117   |
| NM_009829        | Ccnd2       | 0.087            | -4.698     | 1557               | 11400 | 9323  | 4872                | 2578  | 772   |
| NM_015734        | Col5a1      | 0.166            | -4.655     | 3954               | 12259 | 14152 | 6686                | 2678  | 3330  |
| NM_028266        | Col16a1     | 0.374            | -4.603     | 1648               | 3315  | 2456  | 7552                | 1430  | 1068  |
| NM_029999        | Lbh         | 0.965            | -4.557     | 1725               | 18195 | 7558  | 2424                | 1096  | 608   |
| NM_010284        | Ghr         | -0.510           | -4.488     | 2490               | 8793  | 8403  | 7529                | 6521  | 6755  |
| NM_011170        | Prnp        | -0.956           | -4.374     | 1408               | 4700  | 3719  | 654                 | 397   | 417   |
| NM_010518        | Igfbp5      | 0.564            | -4.335     | 2987               | 1855  | 680   | 2709                | 1251  | 3608  |
| NM_008304        | Sdc2        | -0.949           | -4.285     | 993                | 2946  | 3285  | 2231                | 2193  | 3253  |
| NM_007616        | Cav1        | 0.762            | -4.223     | 692                | 11524 | 6085  | 2534                | 915   | 962   |
| NM_009932        | Col4a2      | 0.002            | -4.194     | 4959               | 8951  | 8288  | 8375                | 3550  | 2923  |
| NM_010917        | Nid1        | -0.251           | -4.189     | 347                | 756   | 1017  | 1152                | 1799  | 1189  |
| NM_172753        | Csgalnact1  | -0.863           | -4.140     | 4829               | 7789  | 9574  | 11626               | 7492  | 5408  |
| NM_011923        | Angptl2     | -0.295           | -4.131     | 1545               | 9684  | 11130 | 796                 | 555   | 609   |
| NM_028444        | Prkcdpb     | 0.205            | -4.117     | 849                | 4030  | 3092  | 556                 | 39    | 20    |
| NM_010128        | Emp1        | 0.982            | -3.858     | 237                | 12129 | 4322  | 1348                | 711   | 431   |
| NM_053109        | Clec2d      | -0.602           | -3.817     | 55                 | 10285 | 3667  | 142                 | 185   | 92    |

|              |               |        |        |      |       |       |       |       |       |
|--------------|---------------|--------|--------|------|-------|-------|-------|-------|-------|
| NM_018865    | Wisp1         | 0.779  | -3.812 | 371  | 9473  | 7575  | 1973  | 940   | 921   |
| NM_177364    | Sh3pxd2b      | -0.486 | -3.795 | 3629 | 6487  | 6747  | 4356  | 2191  | 2228  |
| NM_033217    | Ngfr          | 0.790  | -3.793 | 3135 | 5605  | 1611  | 3547  | 2114  | 5178  |
| NM_009465    | Axl           | 1.122  | -3.781 | 922  | 6201  | 3463  | 1701  | 731   | 495   |
| NM_027976    | Acsl5         | -0.164 | -3.729 | 764  | 3303  | 4402  | 1968  | 1271  | 1224  |
| NM_023275    | Rhoj          | -0.155 | -3.718 | 1294 | 5664  | 5289  | 4338  | 1524  | 1005  |
| NM_027078    | 1700023M03Rik | -0.901 | -3.689 | 3218 | 6331  | 5161  | 555   | 703   | 442   |
| NM_021299    | Ak3           | -0.747 | -3.663 | 2779 | 3937  | 4774  | 953   | 822   | 508   |
| NM_008391    | Irf2          | -0.272 | -3.661 | 4075 | 8201  | 6772  | 5064  | 2032  | 1333  |
| NM_001048207 | Gypc          | -0.424 | -3.628 | 1186 | 2716  | 3545  | 1971  | 996   | 749   |
| NM_183308    | Pon2          | 0.368  | -3.624 | 944  | 3658  | 2497  | 1839  | 623   | 837   |
| NM_011607    | Tnc           | 1.502  | -3.569 | 451  | 763   | 379   | 2186  | 1454  | 1041  |
| NM_017464    | Nedd9         | -0.864 | -3.569 | 1357 | 5159  | 5375  | 2949  | 1674  | 1440  |
| NM_153138    | Wipf1         | -0.251 | -3.563 | 3969 | 8252  | 10303 | 4537  | 1257  | 2024  |
| NM_172589    | Lhfpl2        | -0.338 | -3.552 | 4199 | 13058 | 11619 | 8587  | 3948  | 3513  |
| NM_009755    | Bmp1          | -0.830 | -3.552 | 2636 | 4663  | 8634  | 4854  | 1303  | 1083  |
| NM_008332    | Ifit2         | -0.447 | -3.539 | 358  | 3628  | 1824  | 1253  | 657   | 721   |
| NM_172298    | Tshz3         | -0.713 | -3.519 | 4067 | 3978  | 4407  | 4416  | 1863  | 770   |
| NM_026582    | Gpr177        | 0.013  | -3.503 | 1460 | 7304  | 4436  | 3170  | 1863  | 1280  |
| NM_029005    | Mkl           | -0.232 | -3.503 | 463  | 2643  | 3415  | 1713  | 624   | 492   |
| NM_028713    | Rftn2         | -0.830 | -3.497 | 762  | 4947  | 3969  | 2887  | 1408  | 1397  |
| NM_146191    | Lrrk1         | 0.399  | -3.494 | 2582 | 5684  | 4392  | 7163  | 2057  | 1454  |
| NM_018884    | Pdzrn3        | 0.257  | -3.484 | 3537 | 12973 | 10258 | 10483 | 7220  | 7149  |
| NM_146090    | Zadh2         | -0.748 | -3.426 | 3275 | 7000  | 7843  | 1682  | 284   | 122   |
| NM_007778    | Csf1          | -0.925 | -3.416 | 1503 | 8739  | 6579  | 2684  | 401   | 186   |
| NM_009806    | Cask          | -0.469 | -3.394 | 2281 | 5521  | 5255  | 4063  | 3996  | 4224  |
| NM_009794    | Capn2         | 0.338  | -3.378 | 3150 | 7352  | 5768  | 3354  | 950   | 1117  |
| NM_178660    | Rbms3         | -0.266 | -3.376 | 3327 | 12774 | 13274 | 20828 | 12919 | 15914 |
| NM_178711    | Plscr4        | -0.936 | -3.354 | 620  | 3109  | 2847  | 1640  | 765   | 1092  |

|           |               |        |        |      |       |       |      |      |      |
|-----------|---------------|--------|--------|------|-------|-------|------|------|------|
| NM_054040 | Tulp4         | -0.594 | -3.316 | 657  | 1320  | 1143  | 2953 | 3330 | 2363 |
| NM_007392 | Acta2         | 0.799  | -3.312 | 174  | 2270  | 852   | 697  | 785  | 260  |
| NM_133685 | Rab31         | -0.623 | -3.291 | 2793 | 7102  | 6560  | 4025 | 4039 | 2902 |
| NM_008973 | Ptn           | 0.837  | -3.274 | 566  | 4859  | 972   | 3419 | 3267 | 5511 |
| NM_172921 | D930028F11Rik | -0.602 | -3.254 | 1956 | 2813  | 3643  | 8589 | 5219 | 5154 |
| NM_009812 | Casp8         | -0.359 | -3.246 | 457  | 3495  | 3265  | 1561 | 1144 | 1227 |
| NM_020606 | Parva         | -0.204 | -3.240 | 3167 | 4499  | 3602  | 7497 | 3022 | 1795 |
| NM_030612 | Nfkbiz        | 0.444  | -3.227 | 4506 | 16134 | 11366 | 1359 | 715  | 747  |
| NM_009964 | Cryab         | -0.157 | -3.217 | 333  | 3827  | 6506  | 580  | 40   | 110  |
| NM_146258 | Stard13       | 1.040  | -3.183 | 1328 | 15412 | 7301  | 5516 | 3060 | 3611 |
| NM_175088 | Mdfic         | -0.577 | -3.158 | 2539 | 7630  | 7824  | 2502 | 2861 | 2338 |
| NM_133662 | Ier3          | -0.453 | -3.144 | 2095 | 4470  | 3953  | 146  | 147  | 41   |
| NM_053201 | Magee1        | -0.862 | -3.120 | 1524 | 2132  | 3744  | 382  | 15   | 39   |
| NM_015760 | Nox4          | -0.083 | -3.104 | 917  | 2842  | 1798  | 2983 | 1932 | 1828 |
| NM_145509 | 5430435G22Rik | -0.481 | -3.082 | 232  | 2046  | 3078  | 1099 | 767  | 594  |
| NM_021890 | Fads3         | 0.115  | -3.075 | 1188 | 7140  | 5130  | 2200 | 613  | 431  |
| NM_133990 | Il13ra1       | -0.785 | -3.074 | 1059 | 2596  | 3587  | 1274 | 682  | 913  |
| NM_175483 | Snx33         | -0.662 | -3.051 | 1870 | 8675  | 11099 | 1993 | 273  | 358  |
| NM_175386 | Lhfp          | 0.361  | -3.020 | 3121 | 7235  | 5672  | 7399 | 3929 | 2440 |
| NM_025823 | Pcyox1        | -0.911 | -3.009 | 4926 | 5590  | 4151  | 375  | 542  | 227  |
| NM_009825 | Serpinh1      | -0.665 | -2.996 | 1366 | 10032 | 7244  | 900  | 154  | 178  |
| NM_008377 | Lrig1         | 0.711  | -2.991 | 5909 | 15264 | 9512  | 4067 | 3124 | 2033 |
| NM_010685 | Lamp2         | -0.275 | -2.985 | 1675 | 3194  | 2711  | 304  | 642  | 514  |
| NM_009673 | Anxa5         | 1.515  | -2.982 | 2575 | 9197  | 3952  | 1595 | 741  | 204  |
| NM_201518 | Flrt2         | 0.693  | -2.958 | 3249 | 11025 | 6114  | 4694 | 2054 | 1553 |
| NM_008538 | Marcks        | 0.015  | -2.954 | 4853 | 11514 | 9545  | 619  | 159  | 154  |
| NM_007585 | Anxa2         | 0.392  | -2.913 | 1432 | 8048  | 5925  | 2027 | 775  | 764  |
| NM_025975 | Dynlt3        | -0.432 | -2.900 | 504  | 1797  | 1869  | 120  | 207  | 109  |
| NM_011182 | Pscd3         | -0.699 | -2.895 | 2945 | 7382  | 8433  | 2439 | 1761 | 2058 |

|              |            |        |        |      |       |       |       |       |       |
|--------------|------------|--------|--------|------|-------|-------|-------|-------|-------|
| NM_009369    | Tgfbi      | 0.989  | -2.881 | 1042 | 3929  | 2236  | 2589  | 981   | 972   |
| NM_008737    | Nrp1       | 0.424  | -2.865 | 2406 | 6946  | 4397  | 5279  | 2759  | 2611  |
| NM_019572    | Hdac7      | -0.807 | -2.842 | 2960 | 5204  | 7940  | 4410  | 1804  | 966   |
| NM_029100    | Sepn1      | 0.021  | -2.840 | 1990 | 2225  | 1441  | 690   | 636   | 169   |
| NM_011520    | Sdc3       | 0.195  | -2.823 | 2276 | 4073  | 3078  | 3874  | 1499  | 325   |
| NM_029682    | Stambpl1   | 0.022  | -2.815 | 1832 | 7794  | 6133  | 1888  | 1255  | 1380  |
| NM_018763    | Chst2      | -0.593 | -2.815 | 6216 | 3608  | 7025  | 2238  | 209   | 184   |
| NM_153507    | Cpne2      | -0.932 | -2.804 | 1875 | 3055  | 4855  | 3678  | 1157  | 1002  |
| NM_011311    | S100a4     | -0.773 | -2.791 | 20   | 1600  | 2020  | 290   | 36    | 16    |
| NM_001040088 | Sytl2      | 1.585  | -2.790 | 142  | 136   | 373   | 685   | 549   | 503   |
| NM_008135    | Slc6a9     | 0.819  | -2.786 | 6073 | 5588  | 3910  | 2115  | 933   | 378   |
| NM_029777    | Rhbdd1     | 0.001  | -2.773 | 2949 | 4537  | 3981  | 3246  | 2942  | 3758  |
| NM_146168    | AW146242   | -0.351 | -2.770 | 3181 | 5054  | 5027  | 2394  | 2563  | 1773  |
| NM_009242    | Sparc      | -0.759 | -2.759 | 1708 | 14053 | 9320  | 923   | 903   | 492   |
| NM_177388    | Slc41a2    | -0.049 | -2.756 | 3885 | 4991  | 4486  | 5124  | 3908  | 3032  |
| NM_026280    | Mxra7      | -0.896 | -2.722 | 2603 | 6413  | 6634  | 1779  | 576   | 479   |
| NM_133969    | Cyp4v3     | -0.633 | -2.718 | 954  | 2428  | 1864  | 1290  | 647   | 351   |
| NM_019989    | Sh3bgrl    | -0.519 | -2.704 | 607  | 3207  | 2554  | 800   | 1113  | 931   |
| NM_138309    | Cd99l2     | -0.807 | -2.702 | 1082 | 1878  | 2211  | 1234  | 1118  | 920   |
| NM_009154    | Sema5a     | 0.093  | -2.697 | 5643 | 10108 | 11268 | 11586 | 15837 | 20233 |
| NM_001013025 | Tgfbrap1   | -0.646 | -2.693 | 7399 | 7331  | 9292  | 1799  | 1233  | 1459  |
| NM_010736    | Ltbr       | -0.431 | -2.685 | 679  | 6976  | 7525  | 983   | 269   | 168   |
| NM_146057    | Dap        | -0.656 | -2.683 | 2646 | 5250  | 4753  | 2953  | 1629  | 1458  |
| NM_007798    | Ctsb       | -0.392 | -2.674 | 3412 | 6475  | 7259  | 448   | 658   | 656   |
| NM_001081009 | Parp8      | -0.381 | -2.673 | 3428 | 7520  | 8043  | 6382  | 3740  | 5164  |
| NM_011787    | Amfr       | -0.305 | -2.669 | 3774 | 4794  | 5578  | 1353  | 781   | 641   |
| NM_026821    | D4Bwg0951e | 0.747  | -2.653 | 3868 | 8743  | 4134  | 1340  | 642   | 939   |
| NM_025424    | Nenf       | -0.965 | -2.648 | 2329 | 3262  | 3112  | 625   | 387   | 239   |
| NM_173182    | Fndc3b     | -0.101 | -2.634 | 5493 | 8918  | 7144  | 6683  | 5752  | 3291  |

|              |               |        |        |      |       |       |      |      |       |
|--------------|---------------|--------|--------|------|-------|-------|------|------|-------|
| NM_008845    | Pip4k2a       | -0.759 | -2.627 | 4985 | 5133  | 8831  | 5074 | 2535 | 3425  |
| NM_008495    | Lgals1        | 0.632  | -2.622 | 804  | 8502  | 6099  | 213  | 177  | 160   |
| NM_011701    | Vim           | 0.965  | -2.603 | 3451 | 19326 | 12302 | 619  | 218  | 215   |
| NM_025664    | Snx9          | -0.635 | -2.591 | 3758 | 8801  | 7168  | 2503 | 1795 | 1768  |
| NM_001039530 | Parp14        | -0.603 | -2.591 | 893  | 2662  | 3979  | 1177 | 763  | 932   |
| NM_025558    | Cyb5b         | -0.359 | -2.581 | 2488 | 3232  | 3425  | 549  | 594  | 741   |
| NM_009396    | Tnfaip2       | 0.708  | -2.577 | 1175 | 6691  | 4387  | 4010 | 336  | 146   |
| NM_011179    | Psap          | -0.691 | -2.567 | 3904 | 4671  | 5697  | 634  | 722  | 518   |
| NM_145406    | Slc10a3       | -0.823 | -2.561 | 653  | 1308  | 1663  | 57   | 157  | 62    |
| NM_019542    | Nagk          | -0.701 | -2.560 | 3710 | 6803  | 5035  | 366  | 256  | 164   |
| NM_153117    | 9530068E07Rik | -0.755 | -2.553 | 3638 | 2739  | 3086  | 346  | 302  | 387   |
| NM_009127    | Scd1          | -0.184 | -2.548 | 1568 | 2908  | 2225  | 509  | 325  | 404   |
| NM_010687    | Large         | -0.484 | -2.541 | 5554 | 7840  | 10593 | 9597 | 8309 | 15388 |
| NM_022563    | Ddr2          | -0.489 | -2.523 | 825  | 781   | 1654  | 4361 | 2118 | 3908  |
| NM_009207    | Slc4a2        | 0.903  | -2.523 | 2668 | 6050  | 4356  | 785  | 471  | 179   |
| NM_008681    | Ndrgr1        | 0.200  | -2.512 | 3019 | 7660  | 5972  | 2860 | 1905 | 1907  |
| NM_008908    | Ppic          | -0.688 | -2.511 | 2330 | 3116  | 4987  | 836  | 266  | 295   |
| NM_001001491 | Tpm4          | 0.373  | -2.508 | 3974 | 5903  | 6790  | 535  | 236  | 234   |
| NM_011824    | Grem1         | 1.649  | -2.505 | 2075 | 6171  | 4699  | 1974 | 320  | 1042  |
| NM_010730    | Anxa1         | 0.198  | -2.504 | 131  | 9017  | 2944  | 624  | 409  | 842   |
| NM_175150    | Txndc15       | -0.971 | -2.504 | 2554 | 2926  | 2923  | 401  | 427  | 387   |
| NM_020590    | Gabarapl1     | -0.630 | -2.501 | 2902 | 6864  | 4652  | 306  | 400  | 206   |
| NM_025277    | Gng10         | 0.101  | -2.500 | 1043 | 2539  | 2629  | 489  | 305  | 73    |
| NM_177684    | Zfp637        | -0.345 | -2.499 | 2864 | 4426  | 3645  | 144  | 179  | 65    |
| NM_020332    | Ank           | 0.172  | -2.492 | 4153 | 7473  | 5008  | 4408 | 3614 | 3495  |
| NM_012037    | Vat1          | -0.492 | -2.490 | 5153 | 7203  | 7948  | 336  | 292  | 136   |
| NM_207223    | Acap3         | -0.361 | -2.489 | 5746 | 7930  | 7257  | 880  | 325  | 153   |
| NM_173379    | Leprel1       | 0.296  | -2.484 | 2951 | 7667  | 4959  | 6542 | 3606 | 5363  |
| NM_024437    | Nudt7         | 0.373  | -2.460 | 343  | 1506  | 2348  | 550  | 441  | 486   |

|              |               |        |        |      |       |       |       |       |       |
|--------------|---------------|--------|--------|------|-------|-------|-------|-------|-------|
| NM_011766    | Zfpm2         | -0.034 | -2.442 | 3547 | 7278  | 9847  | 15201 | 11338 | 16140 |
| NM_175535    | Arhgap20      | -0.920 | -2.437 | 4155 | 2602  | 4984  | 3104  | 3126  | 2341  |
| NM_010476    | Hsd17b7       | -0.772 | -2.428 | 910  | 2931  | 2727  | 633   | 367   | 559   |
| NM_019654    | Socs5         | -0.164 | -2.419 | 4196 | 8061  | 7086  | 1295  | 1025  | 716   |
| NM_011595    | Timp3         | -0.662 | -2.415 | 2529 | 5132  | 4669  | 2237  | 5497  | 1798  |
| NM_019791    | Maged1        | -0.671 | -2.414 | 1753 | 2888  | 4433  | 198   | 152   | 71    |
| NM_011578    | Tgfbr3        | -0.943 | -2.412 | 5080 | 9214  | 7538  | 8403  | 4414  | 2108  |
| NM_033144    | Sept8         | -0.858 | -2.395 | 2609 | 5601  | 6414  | 1889  | 660   | 672   |
| NM_013685    | Tcf4          | -0.492 | -2.393 | 4745 | 17359 | 20060 | 8227  | 7957  | 9119  |
| NM_011593    | Timp1         | -0.758 | -2.384 | 849  | 2722  | 3097  | 54    | 55    | 35    |
| NM_025473    | 1810037C20Rik | -0.803 | -2.370 | 1391 | 2133  | 2387  | 164   | 267   | 125   |
| NM_146119    | Fam129b       | 0.054  | -2.363 | 4942 | 9122  | 12676 | 1256  | 811   | 634   |
| NM_007609    | Casp4         | -0.159 | -2.348 | 40   | 2294  | 1740  | 533   | 442   | 654   |
| NM_028493    | Rhobtb3       | 0.344  | -2.347 | 4263 | 5828  | 5590  | 2479  | 1414  | 1449  |
| NM_009543    | Rnf103        | 0.360  | -2.339 | 4029 | 6288  | 5800  | 705   | 535   | 489   |
| NM_173788    | Npr2          | -0.989 | -2.336 | 3159 | 2083  | 2763  | 2085  | 1780  | 311   |
| NM_175193    | Golim4        | 0.367  | -2.333 | 2966 | 6763  | 4933  | 2660  | 1812  | 1102  |
| NM_148926    | Zfand3        | -0.092 | -2.331 | 5123 | 7678  | 6164  | 3949  | 6527  | 4894  |
| NM_010237    | Frk           | -0.975 | -2.323 | 421  | 3061  | 5276  | 2944  | 2826  | 3910  |
| NM_012056    | Fkbp9         | -0.779 | -2.315 | 3152 | 5181  | 3288  | 773   | 1452  | 1007  |
| NM_178111    | Trp53inp2     | -0.533 | -2.310 | 2452 | 2497  | 3814  | 443   | 232   | 253   |
| NM_144839    | Ube2e2        | -0.236 | -2.304 | 3106 | 4479  | 5041  | 6854  | 6110  | 7339  |
| NM_198160    | Smarcc2       | -0.670 | -2.297 | 4189 | 6915  | 5000  | 1200  | 987   | 618   |
| NM_009068    | Ripk1         | -0.853 | -2.296 | 3195 | 3432  | 4178  | 981   | 953   | 1080  |
| NM_001039387 | Nelf          | -0.914 | -2.289 | 1345 | 2584  | 4628  | 977   | 382   | 175   |
| NM_028643    | Efha1         | -0.195 | -2.282 | 2304 | 3135  | 3142  | 2740  | 2007  | 2123  |
| NM_134099    | Fbxo4         | -0.591 | -2.265 | 1694 | 2052  | 2072  | 409   | 466   | 412   |
| NM_007671    | Cdkn2c        | 0.095  | -2.265 | 3017 | 8818  | 4196  | 1569  | 64    | 53    |
| NM_027992    | 2310036D22Rik | -0.773 | -2.259 | 1943 | 4501  | 3306  | 273   | 373   | 455   |

|           |               |        |        |      |       |       |      |      |      |
|-----------|---------------|--------|--------|------|-------|-------|------|------|------|
| NM_016753 | Lxn           | 0.559  | -2.259 | 1038 | 2543  | 2677  | 142  | 117  | 65   |
| NM_024239 | Stambp        | 0.042  | -2.255 | 1053 | 3740  | 3533  | 940  | 688  | 533  |
| NM_025772 | Dtnbp1        | -0.907 | -2.249 | 3488 | 3939  | 5184  | 2469 | 1961 | 2139 |
| NM_009368 | Tgfb3         | -0.263 | -2.248 | 868  | 4184  | 3509  | 1607 | 359  | 331  |
| NM_177740 | Rgma          | -0.662 | -2.235 | 5805 | 9903  | 6358  | 8804 | 1281 | 1263 |
| NM_028013 | Endod1        | 1.020  | -2.232 | 2444 | 3570  | 3310  | 1684 | 591  | 917  |
| NM_175074 | Hmgn3         | 0.492  | -2.231 | 1207 | 2915  | 3888  | 1709 | 639  | 885  |
| NM_181397 | Rftn1         | -0.830 | -2.228 | 4057 | 4967  | 7027  | 8890 | 7037 | 5006 |
| NM_010169 | F2r           | 0.712  | -2.220 | 3356 | 5425  | 4334  | 1269 | 661  | 593  |
| NM_008862 | Pkia          | 1.154  | -2.218 | 1232 | 2432  | 1424  | 2104 | 1366 | 1190 |
| NM_008882 | Plxna2        | -0.558 | -2.214 | 4568 | 5236  | 9060  | 8386 | 4210 | 5757 |
| NM_019813 | Dbn1          | -0.454 | -2.207 | 1692 | 5343  | 6256  | 2330 | 673  | 372  |
| NM_011777 | Zyx           | 0.728  | -2.202 | 3117 | 16179 | 9179  | 926  | 397  | 216  |
| NM_009621 | Adamts1       | 0.174  | -2.191 | 2351 | 13917 | 10702 | 1550 | 396  | 253  |
| NM_139272 | Galnt2        | -0.660 | -2.190 | 5403 | 4993  | 10876 | 3193 | 2666 | 3452 |
| NM_146142 | Tdrd7         | -0.135 | -2.189 | 366  | 522   | 200   | 1899 | 1368 | 580  |
| NM_010203 | Fgf5          | 3.940  | -2.189 | 1220 | 14664 | 231   | 2803 | 681  | 1029 |
| NM_172814 | Lrp12         | 0.151  | -2.180 | 4781 | 6364  | 6232  | 1503 | 1694 | 1982 |
| NM_018855 | Gas8          | -0.887 | -2.180 | 1102 | 2438  | 5869  | 735  | 402  | 1102 |
| NM_013470 | Anxa3         | -0.457 | -2.166 | 597  | 3246  | 2319  | 2714 | 1219 | 775  |
| NM_025745 | 4933407N01Rik | -0.976 | -2.160 | 3935 | 3946  | 4532  | 651  | 508  | 760  |
| NM_010875 | Ncam1         | 0.682  | -2.157 | 6059 | 7499  | 8744  | 9246 | 6887 | 8030 |
| NM_018794 | Atp6ap1       | -0.308 | -2.156 | 2752 | 2561  | 3122  | 89   | 50   | 141  |
| NM_027399 | Steap1        | -0.017 | -2.152 | 2191 | 3642  | 2531  | 675  | 410  | 140  |
| NM_007899 | Ecm1          | -0.337 | -2.146 | 493  | 405   | 591   | 430  | 218  | 35   |
| NM_172845 | Adamts4       | 0.845  | -2.143 | 1155 | 3824  | 5117  | 526  | 249  | 98   |
| NM_133626 | Rrbp1         | -0.182 | -2.140 | 6349 | 4515  | 7588  | 504  | 402  | 423  |
| NM_133748 | Insig2        | -0.518 | -2.131 | 2766 | 4045  | 4412  | 598  | 561  | 664  |
| NM_011627 | Tpbp          | -0.468 | -2.122 | 4455 | 6723  | 8002  | 888  | 175  | 82   |

|           |               |        |        |      |       |       |       |      |      |
|-----------|---------------|--------|--------|------|-------|-------|-------|------|------|
| NM_009643 | Ahnak         | 0.130  | -2.115 | 5637 | 10174 | 11510 | 832   | 660  | 643  |
| NM_009365 | Tgfb1i1       | 0.541  | -2.114 | 737  | 2121  | 2074  | 1062  | 156  | 97   |
| NM_011078 | Phf2          | -0.432 | -2.113 | 4792 | 4662  | 6691  | 2681  | 2169 | 1458 |
| NM_025808 | Lztr1         | -0.593 | -2.112 | 3496 | 4356  | 4493  | 369   | 656  | 344  |
| NM_134142 | Tmem109       | -0.606 | -2.112 | 1315 | 2324  | 3211  | 635   | 317  | 389  |
| NM_172608 | Tmem184b      | -0.679 | -2.108 | 4684 | 5221  | 8898  | 1526  | 1584 | 983  |
| NM_139143 | Slc39a6       | 0.490  | -2.107 | 5092 | 5540  | 6083  | 728   | 769  | 604  |
| NM_011673 | Ugcg          | 0.148  | -2.095 | 3614 | 12656 | 6480  | 713   | 739  | 322  |
| NM_175195 | 3110056O03Rik | 0.293  | -2.091 | 4631 | 5995  | 5746  | 531   | 493  | 276  |
| NM_011354 | Serf2         | -0.638 | -2.087 | 4347 | 5443  | 5301  | 66    | 60   | 48   |
| NM_021389 | Sh3kbp1       | 1.569  | -2.082 | 705  | 2211  | 1419  | 5281  | 3599 | 3245 |
| NM_139297 | Ugp2          | -0.268 | -2.082 | 2477 | 6449  | 4753  | 2045  | 1299 | 1398 |
| NM_019880 | Mtch1         | -0.207 | -2.080 | 3148 | 3329  | 4275  | 636   | 512  | 318  |
| NM_007437 | Aldh3a2       | -0.248 | -2.080 | 2347 | 3672  | 3528  | 1236  | 585  | 550  |
| NM_007837 | Ddit3         | 1.275  | -2.073 | 4333 | 14807 | 5858  | 160   | 193  | 114  |
| NM_009163 | Sgpl1         | -0.306 | -2.071 | 7158 | 6815  | 8335  | 1163  | 1426 | 1611 |
| NM_008783 | Pbx1          | -0.964 | -2.056 | 2828 | 8476  | 10300 | 12601 | 7369 | 7325 |
| NM_009128 | Scd2          | -0.303 | -2.041 | 4801 | 13439 | 8710  | 259   | 572  | 264  |
| NM_144832 | BC017643      | -0.949 | -2.039 | 2173 | 2606  | 3650  | 226   | 167  | 213  |
| NM_013826 | Mocs2         | 0.039  | -2.037 | 1981 | 3407  | 3168  | 377   | 316  | 256  |
| NM_026995 | Carkd         | -0.516 | -2.037 | 3681 | 3076  | 3230  | 307   | 379  | 375  |
| NM_025932 | Syap1         | -0.200 | -2.033 | 1361 | 1604  | 2044  | 270   | 507  | 310  |
| NM_025831 | 1300014I06Rik | 0.095  | -2.033 | 3377 | 7771  | 6792  | 3597  | 798  | 646  |
| NM_011546 | Zeb1          | 0.227  | -2.028 | 6315 | 7194  | 8330  | 3838  | 3571 | 4646 |
| NM_019963 | Stat2         | -0.941 | -2.028 | 2665 | 4567  | 3297  | 619   | 903  | 649  |
| NM_008961 | Pter          | 0.227  | -2.026 | 912  | 2439  | 2971  | 1857  | 1188 | 1750 |
| NM_029626 | Glt8d1        | -0.906 | -2.026 | 4890 | 4070  | 5216  | 475   | 279  | 335  |
| NM_023142 | Arpc1b        | -0.096 | -2.018 | 3300 | 5476  | 5145  | 365   | 292  | 205  |
| NM_008098 | Mtpn          | 0.904  | -2.014 | 4488 | 7358  | 5299  | 434   | 1025 | 798  |



|           |         |        |        |      |       |       |       |      |      |
|-----------|---------|--------|--------|------|-------|-------|-------|------|------|
| NM_184052 | Igf1    | -0.942 | -2.011 | 383  | 1922  | 2343  | 2387  | 1929 | 1780 |
| NM_021607 | Ncstn   | -0.833 | -2.010 | 4733 | 5734  | 5528  | 320   | 276  | 418  |
| NM_053252 | Ehbp1l1 | 0.578  | -2.009 | 1452 | 5716  | 6634  | 1440  | 510  | 511  |
| NM_007404 | Adam9   | -0.109 | -2.005 | 4562 | 7072  | 4476  | 1298  | 1414 | 778  |
| NM_153459 | Dusp7   | 0.019  | -2.002 | 3280 | 8415  | 8979  | 528   | 216  | 180  |
| NM_028922 | Ppapdc2 | -0.684 | -1.997 | 2711 | 2419  | 3453  | 415   | 188  | 134  |
| NM_022993 | Lrp10   | -0.710 | -1.995 | 3606 | 3248  | 3947  | 205   | 197  | 135  |
| NM_007552 | Bmi1    | -0.481 | -1.988 | 2054 | 2725  | 3074  | 3953  | 991  | 299  |
| NM_011863 | Papss1  | 1.326  | -1.986 | 1730 | 3186  | 2033  | 1719  | 1821 | 746  |
| NM_053147 | Pcdhb22 | -0.350 | -1.984 | 147  | 123   | 113   | 920   | 114  | 96   |
| NM_133987 | Slc6a8  | 0.082  | -1.979 | 2183 | 4983  | 4915  | 290   | 85   | 136  |
| NM_027950 | Osgin1  | -0.330 | -1.974 | 444  | 1601  | 3799  | 1205  | 457  | 453  |
| NM_144822 | Cbara1  | -0.644 | -1.973 | 3664 | 5746  | 5218  | 4448  | 3996 | 4097 |
| NM_053197 | Sfxn3   | -0.300 | -1.969 | 995  | 3621  | 4170  | 464   | 175  | 183  |
| NM_016783 | Pgrmc1  | -0.955 | -1.968 | 2857 | 2549  | 3044  | 82    | 105  | 128  |
| NM_175514 | Fam171b | 0.755  | -1.968 | 2581 | 2367  | 2486  | 2243  | 1158 | 1685 |
| NM_199449 | Zhx2    | 0.534  | -1.959 | 3523 | 6256  | 6327  | 9364  | 5339 | 4154 |
| NM_172413 | Rap2c   | -0.072 | -1.958 | 1118 | 3010  | 2378  | 220   | 288  | 203  |
| NM_018886 | Lgals8  | -0.480 | -1.954 | 4110 | 4249  | 4287  | 865   | 478  | 414  |
| NM_016686 | Vezf1   | -0.147 | -1.951 | 4381 | 5189  | 4960  | 1767  | 404  | 375  |
| NM_152808 | Slc44a2 | -0.531 | -1.949 | 881  | 113   | 171   | 474   | 358  | 202  |
| NM_146174 | Fam115c | -0.804 | -1.949 | 359  | 1377  | 1389  | 896   | 979  | 766  |
| NM_011580 | Thbs1   | -0.318 | -1.943 | 943  | 7596  | 8361  | 1393  | 317  | 337  |
| NM_007783 | Csk     | -0.313 | -1.930 | 2077 | 4610  | 5037  | 622   | 520  | 322  |
| NM_134093 | Letmd1  | 0.146  | -1.929 | 1893 | 3296  | 4484  | 754   | 264  | 267  |
| NM_153119 | Plekho2 | -0.140 | -1.924 | 1630 | 6877  | 6860  | 789   | 566  | 434  |
| NM_010789 | Meis1   | -0.520 | -1.921 | 3333 | 10962 | 10201 | 12170 | 3082 | 3961 |
| NM_030887 | Jdp2    | 0.715  | -1.919 | 3861 | 6326  | 3943  | 2849  | 1030 | 660  |
| NM_019566 | Rhog    | 0.143  | -1.918 | 2379 | 4561  | 3839  | 564   | 292  | 103  |

|              |               |        |        |      |       |       |      |       |       |
|--------------|---------------|--------|--------|------|-------|-------|------|-------|-------|
| NM_008512    | Lrp1          | -0.571 | -1.911 | 5202 | 12925 | 10638 | 4806 | 3937  | 4564  |
| NM_031998    | Tsga14        | -0.281 | -1.910 | 867  | 2373  | 2179  | 1603 | 1391  | 988   |
| NM_023168    | Grina         | -0.482 | -1.906 | 2823 | 4979  | 5381  | 339  | 119   | 120   |
| NM_021454    | Cdc42ep5      | -0.554 | -1.905 | 635  | 2529  | 2434  | 411  | 240   | 145   |
| NM_029646    | 2010004A03Rik | -0.616 | -1.901 | 1121 | 2355  | 817   | 2533 | 1451  | 1240  |
| NM_007387    | Acp2          | -0.427 | -1.898 | 2079 | 3189  | 3013  | 195  | 116   | 304   |
| NM_019924    | Rps6ka4       | 0.112  | -1.896 | 2201 | 3485  | 4884  | 3046 | 286   | 295   |
| NM_172570    | Trim47        | -0.427 | -1.895 | 2534 | 6343  | 6785  | 2639 | 222   | 87    |
| NM_001012396 | Ptpla         | -0.468 | -1.895 | 4645 | 3662  | 4368  | 1224 | 505   | 666   |
| NM_133979    | Ano10         | -0.387 | -1.894 | 2186 | 3409  | 3782  | 6912 | 3049  | 2756  |
| NM_009254    | Serpinb6a     | -0.095 | -1.890 | 2575 | 4882  | 4860  | 365  | 450   | 541   |
| NM_024427    | Tpm1          | 0.742  | -1.887 | 8275 | 11573 | 11338 | 1562 | 699   | 899   |
| NM_029793    | Golga1        | -0.625 | -1.886 | 4407 | 4369  | 5209  | 840  | 728   | 1138  |
| NM_026640    | 4632417K18Rik | 0.747  | -1.884 | 79   | 3278  | 1796  | 496  | 322   | 397   |
| NM_145503    | Lzts2         | -0.219 | -1.877 | 4453 | 9605  | 9853  | 1260 | 527   | 274   |
| NM_010368    | Gusb          | -0.689 | -1.876 | 1460 | 2626  | 3347  | 696  | 227   | 228   |
| NM_025385    | Prr13         | -0.245 | -1.875 | 766  | 2632  | 2914  | 85   | 134   | 77    |
| NM_008012    | Akr1b8        | 0.858  | -1.873 | 158  | 2865  | 1224  | 495  | 295   | 333   |
| NM_028162    | Tbc1d5        | 0.027  | -1.869 | 4190 | 8255  | 6914  | 9774 | 10295 | 11437 |
| NM_029624    | Lmf1          | -0.339 | -1.865 | 3337 | 4432  | 4208  | 3308 | 3598  | 2336  |
| NM_023166    | Mtvr2         | -0.646 | -1.861 | 2220 | 3797  | 5115  | 137  | 77    | 42    |
| NM_021550    | C1galt1c1     | -0.928 | -1.860 | 970  | 1453  | 1589  | 35   | 85    | 92    |
| NM_030013    | Cyp20a1       | -0.313 | -1.853 | 2804 | 2861  | 3084  | 984  | 898   | 1223  |
| NM_008380    | Inhba         | 1.107  | -1.851 | 186  | 5931  | 6076  | 1671 | 280   | 580   |
| NM_019760    | Serinc1       | -0.328 | -1.849 | 3435 | 4833  | 4152  | 204  | 366   | 625   |
| NM_147778    | Commd3        | -0.320 | -1.847 | 2728 | 3526  | 4065  | 1399 | 102   | 69    |
| NM_194342    | Unc84b        | 0.345  | -1.845 | 3708 | 5086  | 4162  | 1021 | 397   | 308   |
| NM_026832    | Cgrrf1        | -0.395 | -1.845 | 3240 | 3754  | 4527  | 1330 | 338   | 697   |
| NM_009344    | Phlda1        | 0.574  | -1.842 | 6648 | 10972 | 8203  | 255  | 83    | 85    |

|              |               |        |        |      |       |       |      |      |      |
|--------------|---------------|--------|--------|------|-------|-------|------|------|------|
| NM_010162    | Ext1          | -0.808 | -1.842 | 7195 | 16292 | 16959 | 6997 | 9222 | 8029 |
| NM_022028    | Sav1          | -0.163 | -1.839 | 4077 | 4959  | 3854  | 631  | 571  | 359  |
| NM_177263    | Zhx3          | -0.882 | -1.837 | 2754 | 2779  | 4449  | 3865 | 2423 | 2342 |
| NM_008794    | Pcsk7         | -0.654 | -1.836 | 5626 | 5084  | 6197  | 421  | 375  | 517  |
| NM_028662    | Slc35b2       | -0.365 | -1.833 | 4120 | 4035  | 4807  | 146  | 200  | 72   |
| NM_009821    | Runx1         | -0.129 | -1.830 | 6533 | 15085 | 10504 | 8032 | 2670 | 3976 |
| NM_207217    | Itfg3         | -0.733 | -1.830 | 3394 | 3620  | 3212  | 1087 | 793  | 682  |
| NM_011123    | Plp1          | 1.724  | -1.824 | 20   | 2995  | 116   | 229  | 465  | 203  |
| NM_133895    | Slc15a4       | -0.843 | -1.823 | 6037 | 5975  | 6289  | 513  | 495  | 415  |
| NM_008058    | Fzd8          | -0.919 | -1.823 | 7360 | 5099  | 8893  | 1091 | 150  | 41   |
| NM_028258    | 2610524A10Rik | 0.327  | -1.822 | 1930 | 4787  | 4858  | 1241 | 587  | 1176 |
| NM_178055    | Dnajb2        | -0.246 | -1.822 | 2532 | 3295  | 3594  | 346  | 371  | 175  |
| NM_011032    | P4hb          | -0.801 | -1.819 | 7195 | 6174  | 7270  | 353  | 251  | 280  |
| NM_008027    | Flot1         | -0.445 | -1.815 | 2021 | 4257  | 4873  | 473  | 315  | 193  |
| NM_013881    | Ulk2          | -0.224 | -1.815 | 5150 | 4976  | 6140  | 3522 | 2062 | 2034 |
| NM_146045    | B4galt7       | -0.183 | -1.809 | 2489 | 2986  | 2912  | 280  | 332  | 225  |
| NM_146047    | Clptm1l       | -0.727 | -1.806 | 3841 | 3694  | 4677  | 557  | 218  | 566  |
| NM_001012401 | Hspb6         | 2.137  | -1.803 | 1280 | 2364  | 1465  | 86   | 14   | 61   |
| NM_027135    | Sec24d        | -0.848 | -1.802 | 3218 | 5120  | 3994  | 2058 | 1987 | 1067 |
| NM_021345    | Ptplad1       | -0.756 | -1.802 | 4640 | 4048  | 5128  | 1064 | 597  | 740  |
| NM_001025431 | Btbd3         | -0.709 | -1.800 | 2591 | 5532  | 10872 | 530  | 558  | 590  |
| NM_029394    | Snx24         | 0.818  | -1.797 | 3274 | 6062  | 4489  | 4269 | 3681 | 3564 |
| NM_016807    | Sdcbp         | 1.112  | -1.794 | 1620 | 5150  | 3015  | 452  | 458  | 286  |
| NM_178804    | Slit2         | 0.788  | -1.790 | 4975 | 12075 | 6797  | 8787 | 6332 | 6079 |
| NM_020007    | Mbnl1         | 1.098  | -1.789 | 3367 | 11060 | 5674  | 2560 | 2246 | 1868 |
| NM_027154    | Tmbim1        | -0.492 | -1.788 | 2711 | 5338  | 5803  | 438  | 343  | 349  |
| NM_052976    | Ophn1         | -0.821 | -1.787 | 2735 | 3629  | 4381  | 4184 | 3798 | 3710 |
| NM_028450    | Gulp1         | -0.283 | -1.786 | 3839 | 6414  | 6841  | 6285 | 3919 | 6877 |
| NM_024188    | Oxct1         | -0.071 | -1.785 | 4775 | 5595  | 6435  | 2588 | 3289 | 3527 |

|              |            |        |        |      |       |       |      |      |      |
|--------------|------------|--------|--------|------|-------|-------|------|------|------|
| NM_010874    | Nat2       | -0.346 | -1.783 | 43   | 1284  | 737   | 267  | 207  | 115  |
| NM_133648    | Slc12a6    | -0.293 | -1.777 | 866  | 1140  | 2006  | 1478 | 1114 | 1562 |
| NM_019987    | Ick        | -0.611 | -1.777 | 3476 | 2773  | 4103  | 1412 | 1223 | 1344 |
| NM_178661    | Creb3l2    | 0.432  | -1.776 | 3948 | 11990 | 9080  | 3770 | 2881 | 2009 |
| NM_001001326 | St5        | -0.305 | -1.773 | 1311 | 1013  | 1157  | 2758 | 1808 | 1186 |
| NM_008732    | Slc11a2    | -0.808 | -1.773 | 3183 | 4111  | 5127  | 1196 | 1414 | 1295 |
| NM_008684    | Neo1       | -0.777 | -1.772 | 5203 | 4703  | 7134  | 3307 | 3278 | 4377 |
| NM_019738    | Nupr1      | 0.237  | -1.766 | 1577 | 5143  | 3294  | 56   | 55   | 33   |
| NM_146099    | D19Wsu162e | -0.892 | -1.759 | 3410 | 4367  | 7640  | 1711 | 1254 | 1076 |
| NM_001005248 | Hps5       | -0.129 | -1.758 | 3852 | 3818  | 3233  | 485  | 587  | 317  |
| NM_009069    | Rit1       | 0.229  | -1.754 | 1355 | 4426  | 2379  | 249  | 178  | 132  |
| NM_007670    | Cdkn2b     | 0.656  | -1.753 | 2288 | 3665  | 1799  | 842  | 140  | 85   |
| NM_008083    | Gap43      | 0.472  | -1.748 | 839  | 2516  | 1002  | 3832 | 2595 | 5255 |
| NM_016896    | Map3k14    | -0.907 | -1.748 | 2672 | 3384  | 5537  | 3292 | 1084 | 1133 |
| NM_146236    | Tceal1     | -0.686 | -1.745 | 687  | 903   | 936   | 116  | 19   | 73   |
| NM_153175    | Gimap6     | -0.980 | -1.743 | 84   | 516   | 789   | 320  | 764  | 242  |
| NM_011529    | Tank       | -0.123 | -1.742 | 2733 | 4134  | 3592  | 1741 | 1481 | 2390 |
| NM_007483    | Rhob       | 0.688  | -1.742 | 7353 | 8275  | 6591  | 406  | 96   | 38   |
| NM_172865    | Manea      | 1.323  | -1.741 | 2662 | 4186  | 2469  | 404  | 413  | 288  |
| NM_029745    | Tbc1d9b    | -0.597 | -1.740 | 3602 | 3733  | 4085  | 1773 | 1003 | 802  |
| NM_001042607 | Ryk        | -0.803 | -1.740 | 4711 | 4738  | 6373  | 1300 | 1405 | 1772 |
| NM_175686    | Prrx1      | 0.138  | -1.737 | 989  | 12279 | 11891 | 5586 | 1274 | 2855 |
| NM_001048177 | Jak2       | -0.052 | -1.736 | 2978 | 5835  | 5475  | 2096 | 1466 | 1489 |
| NM_020042    | Mocs1      | -0.855 | -1.732 | 1434 | 3444  | 3624  | 621  | 892  | 555  |
| NM_177152    | Lrig3      | -0.749 | -1.727 | 3355 | 10133 | 8658  | 1573 | 1213 | 1276 |
| NM_009145    | Nptn       | -0.084 | -1.726 | 3651 | 4119  | 4403  | 1102 | 1024 | 1490 |
| NM_019422    | Elovl1     | 0.351  | -1.723 | 1294 | 4911  | 3422  | 107  | 39   | 63   |
| NM_018769    | Dfna5h     | -0.774 | -1.722 | 1235 | 2228  | 2509  | 2446 | 3529 | 1670 |
| NM_011264    | Rev3l      | -0.682 | -1.722 | 6319 | 5401  | 7114  | 2330 | 3153 | 4120 |

|              |               |        |        |      |       |      |      |      |      |
|--------------|---------------|--------|--------|------|-------|------|------|------|------|
| NM_144516    | Zmynd11       | -0.069 | -1.716 | 5283 | 6768  | 7514 | 2288 | 1451 | 2171 |
| NM_175383    | B3gnt1        | -0.496 | -1.709 | 5286 | 5426  | 5618 | 471  | 151  | 57   |
| NM_178908    | BB146404      | -0.893 | -1.709 | 171  | 1010  | 1137 | 405  | 210  | 156  |
| NM_146094    | Fads1         | 0.114  | -1.707 | 5370 | 6469  | 6510 | 444  | 433  | 470  |
| NM_010163    | Ext2          | -0.850 | -1.705 | 3386 | 3415  | 4292 | 3201 | 2538 | 2735 |
| NM_007875    | Dpagt1        | -0.543 | -1.703 | 2308 | 3230  | 4985 | 191  | 166  | 135  |
| NM_010723    | Lmo4          | 1.269  | -1.697 | 3613 | 10137 | 5222 | 2678 | 336  | 205  |
| NM_008688    | Nfic          | -0.062 | -1.696 | 3297 | 6717  | 6893 | 2964 | 1192 | 598  |
| NM_019749    | Gabarap       | -0.636 | -1.691 | 2100 | 4550  | 4269 | 169  | 110  | 82   |
| NM_011267    | Rgs16         | 2.458  | -1.689 | 1025 | 13659 | 2908 | 812  | 223  | 154  |
| NM_008539    | Smad1         | -0.256 | -1.688 | 4584 | 4199  | 6341 | 1675 | 1091 | 1276 |
| NM_019564    | Htra1         | -0.249 | -1.687 | 6675 | 5172  | 3239 | 2045 | 2713 | 1608 |
| NM_134189    | Galnt10       | -0.543 | -1.686 | 6097 | 5359  | 6616 | 8098 | 4100 | 3378 |
| NM_025287    | Spop          | -0.138 | -1.684 | 2002 | 4304  | 4097 | 2284 | 2073 | 2219 |
| NM_025514    | D10Ertd641e   | -0.269 | -1.683 | 3864 | 3280  | 3871 | 377  | 539  | 401  |
| NM_011792    | Bace1         | -0.386 | -1.683 | 2136 | 4526  | 6210 | 623  | 508  | 450  |
| NM_173007    | Tspan12       | 0.141  | -1.681 | 2858 | 3038  | 4028 | 2974 | 3866 | 1540 |
| NM_001039581 | Abca3         | 0.020  | -1.680 | 3917 | 4139  | 4770 | 2625 | 2297 | 1971 |
| NM_010347    | Aes           | -0.462 | -1.675 | 2614 | 6908  | 7774 | 252  | 294  | 161  |
| NM_026524    | Mid1ip1       | 0.548  | -1.674 | 2920 | 5328  | 4787 | 71   | 68   | 22   |
| NM_025861    | Pqlc1         | -0.710 | -1.673 | 4561 | 4121  | 6380 | 2640 | 883  | 829  |
| NM_001083315 | St7           | -0.094 | -1.673 | 2014 | 3163  | 1908 | 5921 | 4777 | 5477 |
| NM_024441    | Hspb2         | -0.298 | -1.671 | 405  | 2122  | 5281 | 323  | 20   | 34   |
| NM_025521    | 2310011J03Rik | -0.653 | -1.670 | 2534 | 3390  | 3476 | 114  | 114  | 74   |
| NM_010562    | Ilk           | 0.738  | -1.666 | 2750 | 7552  | 4066 | 173  | 239  | 48   |
| NM_173451    | Arsj          | 0.169  | -1.666 | 401  | 4261  | 2434 | 2446 | 1678 | 1085 |
| NM_028027    | D10Ertd610e   | -0.509 | -1.663 | 2126 | 6904  | 5017 | 356  | 258  | 230  |
| NM_001013770 | AI747699      | -0.671 | -1.662 | 212  | 243   | 455  | 225  | 360  | 325  |
| NM_172257    | Sidt2         | -0.765 | -1.658 | 4316 | 4965  | 6591 | 754  | 386  | 310  |

|              |               |        |        |      |      |       |       |      |      |
|--------------|---------------|--------|--------|------|------|-------|-------|------|------|
| NM_144551    | Trib2         | -0.325 | -1.657 | 4136 | 7248 | 6380  | 1508  | 650  | 252  |
| NM_173752    | 1110067D22Rik | -0.488 | -1.652 | 4042 | 4053 | 4345  | 611   | 405  | 347  |
| NM_146115    | A830007P12Rik | -0.713 | -1.651 | 2153 | 968  | 1717  | 251   | 135  | 90   |
| NM_019581    | Gtpbp2        | 1.267  | -1.649 | 2031 | 6670 | 3265  | 242   | 430  | 274  |
| NM_030084    | Gpr108        | -0.909 | -1.647 | 3757 | 4273 | 3662  | 394   | 744  | 276  |
| NM_130895    | Adarb1        | -0.472 | -1.645 | 6088 | 4281 | 7010  | 5020  | 3897 | 3757 |
| NM_029655    | Snx7          | 0.995  | -1.640 | 1114 | 5120 | 2298  | 2277  | 1383 | 1063 |
| NM_172615    | 1700021K19Rik | 0.757  | -1.640 | 2453 | 4286 | 3590  | 1323  | 1241 | 1223 |
| NM_025333    | 0610038F07Rik | -0.599 | -1.635 | 3587 | 3902 | 4341  | 473   | 269  | 403  |
| NM_021274    | Cxcl10        | -0.115 | -1.632 | 49   | 447  | 60    | 343   | 98   | 58   |
| NM_016906    | Sec61a1       | -0.529 | -1.627 | 5579 | 8732 | 7573  | 257   | 610  | 322  |
| NM_016978    | Oat           | -0.432 | -1.626 | 1201 | 2583 | 1999  | 894   | 462  | 239  |
| NM_183162    | BC006779      | -0.674 | -1.626 | 658  | 1871 | 2747  | 1624  | 335  | 318  |
| NM_024203    | Fam120b       | -0.142 | -1.623 | 2952 | 4516 | 4481  | 1676  | 1662 | 983  |
| NM_030561    | BC004004      | -0.616 | -1.620 | 1855 | 3243 | 2857  | 886   | 842  | 842  |
| NM_011873    | Dazap2        | -0.443 | -1.620 | 4950 | 5337 | 6401  | 235   | 210  | 123  |
| NM_011175    | Lgmn          | -0.953 | -1.614 | 1849 | 3466 | 2594  | 940   | 697  | 508  |
| NM_007522    | Bad           | -0.626 | -1.613 | 6011 | 8072 | 9341  | 293   | 339  | 274  |
| NM_001081260 | Tnks1bp1      | -0.403 | -1.612 | 785  | 3943 | 6763  | 657   | 560  | 434  |
| NM_133349    | Zfand2a       | 0.260  | -1.611 | 3855 | 4541 | 5281  | 337   | 532  | 296  |
| NM_011890    | Sgcb          | 0.818  | -1.610 | 1176 | 2202 | 1779  | 1466  | 423  | 480  |
| NM_026331    | Slc25a37      | 0.001  | -1.606 | 8257 | 8961 | 10307 | 2826  | 1536 | 1364 |
| NM_175285    | Tmem62        | -0.471 | -1.606 | 2821 | 2045 | 2994  | 956   | 598  | 613  |
| NM_007581    | Cacnb3        | -0.830 | -1.606 | 2129 | 2680 | 4339  | 872   | 523  | 247  |
| NM_009279    | Ssr4          | -0.800 | -1.604 | 5160 | 4296 | 4879  | 79    | 157  | 48   |
| NM_016769    | Smad3         | -0.532 | -1.601 | 4900 | 7827 | 11698 | 4301  | 2312 | 2009 |
| NM_007400    | Adam12        | 0.040  | -1.598 | 3775 | 4204 | 5032  | 13095 | 7248 | 4289 |
| NM_011711    | Fmnl3         | 0.507  | -1.597 | 1994 | 4712 | 3956  | 1922  | 1659 | 1577 |
| NM_009295    | Stxbp1        | -0.235 | -1.592 | 3335 | 3360 | 4370  | 2265  | 1139 | 1051 |

|              |               |        |        |      |       |       |      |      |      |
|--------------|---------------|--------|--------|------|-------|-------|------|------|------|
| NM_026437    | 1810055E12Rik | -0.599 | -1.588 | 2416 | 2536  | 2851  | 324  | 527  | 525  |
| NM_212470    | 0610007C21Rik | -0.439 | -1.585 | 4144 | 4618  | 3042  | 244  | 217  | 39   |
| NM_170755    | Fam134a       | -0.701 | -1.585 | 2923 | 4312  | 5184  | 546  | 178  | 108  |
| NM_053267    | Sepm          | -0.944 | -1.584 | 1718 | 2169  | 2853  | 518  | 163  | 71   |
| NM_080837    | D17Wsu104e    | -0.198 | -1.584 | 4174 | 4524  | 4089  | 273  | 210  | 181  |
| NM_028005    | 2310047M10Rik | -0.600 | -1.581 | 5122 | 5876  | 6868  | 213  | 36   | 45   |
| NM_172525    | Arhgap29      | -0.741 | -1.578 | 2879 | 4783  | 6431  | 2303 | 2139 | 831  |
| NM_016719    | Grb14         | -0.376 | -1.578 | 2801 | 3036  | 3572  | 4311 | 2433 | 3564 |
| NM_029614    | Prss23        | -0.597 | -1.574 | 1727 | 5134  | 3235  | 1454 | 309  | 127  |
| NM_001007568 | Zfp251        | -0.308 | -1.568 | 3966 | 4145  | 5841  | 725  | 335  | 384  |
| NM_026775    | Tmed10        | -0.506 | -1.565 | 2954 | 3141  | 1831  | 760  | 950  | 453  |
| NM_011421    | Smpd1         | -0.606 | -1.562 | 1184 | 2013  | 2325  | 436  | 75   | 61   |
| NM_021428    | Dexi          | -0.822 | -1.562 | 1640 | 3480  | 5099  | 894  | 278  | 345  |
| NM_001003911 | Adamts7       | -0.505 | -1.562 | 3912 | 3826  | 5847  | 3741 | 832  | 916  |
| NM_001029983 | Man1b1        | -0.556 | -1.560 | 5536 | 4086  | 5410  | 506  | 441  | 471  |
| NM_145434    | Nr1d1         | -0.519 | -1.559 | 1577 | 11110 | 8120  | 988  | 243  | 148  |
| NM_028077    | 1810055G02Rik | -0.783 | -1.557 | 3888 | 3315  | 4735  | 464  | 386  | 192  |
| NM_010577    | Itga5         | 0.619  | -1.553 | 4172 | 7624  | 8216  | 612  | 593  | 584  |
| NM_016794    | Vamp8         | 0.255  | -1.548 | 1317 | 4997  | 3974  | 241  | 117  | 122  |
| NM_011609    | Tnfrsf1a      | -0.509 | -1.548 | 1633 | 8410  | 10288 | 2120 | 355  | 258  |
| NM_008349    | Il10rb        | -0.013 | -1.548 | 1509 | 2902  | 2978  | 1704 | 552  | 594  |
| NM_145410    | Fam173a       | 0.483  | -1.548 | 3787 | 3579  | 3953  | 106  | 121  | 63   |
| NM_007881    | Atn1          | 0.292  | -1.548 | 5188 | 7244  | 4908  | 618  | 396  | 217  |
| NM_013653    | Ccl5          | -0.592 | -1.547 | 96   | 92    | 67    | 409  | 158  | 149  |
| NM_146206    | Tpcn2         | 0.075  | -1.544 | 929  | 1724  | 1543  | 832  | 699  | 372  |
| NM_025800    | Ppp1r2        | -0.391 | -1.544 | 1696 | 4888  | 5245  | 633  | 677  | 716  |
| NM_027905    | 1300018J18Rik | -0.588 | -1.542 | 3069 | 4243  | 4895  | 373  | 464  | 289  |
| NM_177583    | Aph1b         | -0.251 | -1.541 | 3420 | 2208  | 2527  | 889  | 526  | 769  |
| NM_172465    | Zdhhc9        | -0.625 | -1.541 | 1959 | 2481  | 2890  | 723  | 325  | 393  |

|              |               |        |        |      |      |       |      |      |      |
|--------------|---------------|--------|--------|------|------|-------|------|------|------|
| NM_030245    | Tada1l        | -0.364 | -1.538 | 2051 | 3479 | 3781  | 1598 | 248  | 335  |
| NM_028186    | Nkd2          | 2.648  | -1.535 | 3074 | 4983 | 2588  | 2941 | 1305 | 1775 |
| NM_001034168 | Ank2          | 0.330  | -1.533 | 70   | 209  | 114   | 751  | 328  | 244  |
| NM_009557    | Zfp46         | 0.576  | -1.532 | 2358 | 3497 | 2738  | 1091 | 198  | 103  |
| NM_134100    | D15Mgi27      | -0.457 | -1.531 | 4003 | 3325 | 4737  | 121  | 72   | 49   |
| NM_172488    | 9030625A04Rik | -0.383 | -1.528 | 1875 | 1734 | 2951  | 576  | 340  | 368  |
| NM_009177    | St3gal1       | -0.943 | -1.527 | 2481 | 6365 | 11863 | 3955 | 2127 | 1736 |
| NM_030256    | Bcl9l         | -0.931 | -1.523 | 2169 | 1857 | 3776  | 725  | 446  | 198  |
| NM_010227    | Flna          | 0.842  | -1.523 | 2523 | 6138 | 4292  | 342  | 404  | 237  |
| NM_134149    | AI837181      | -0.880 | -1.520 | 4187 | 3748 | 5227  | 99   | 101  | 85   |
| NM_019765    | Clip1         | 0.254  | -1.520 | 5183 | 4953 | 3919  | 4674 | 2321 | 1012 |
| NM_027409    | Mospd1        | 0.078  | -1.518 | 1551 | 2316 | 3191  | 285  | 190  | 301  |
| NM_001001979 | Megf10        | 2.688  | -1.514 | 1670 | 3940 | 2099  | 6047 | 3770 | 9223 |
| NM_021899    | Foxj2         | -0.078 | -1.514 | 3211 | 5269 | 4572  | 1402 | 747  | 459  |
| NM_016747    | Dlg3          | 0.177  | -1.513 | 2004 | 3355 | 3568  | 1049 | 1553 | 949  |
| NM_001013028 | AI597468      | -0.524 | -1.512 | 4251 | 8583 | 7331  | 371  | 329  | 466  |
| NM_008364    | Il1rap        | -0.267 | -1.511 | 1740 | 6592 | 6108  | 4597 | 2878 | 3960 |
| NM_172398    | 2310005E10Rik | -0.141 | -1.510 | 1378 | 3108 | 2617  | 300  | 455  | 255  |
| NM_011273    | Xpr1          | -0.282 | -1.508 | 3294 | 4289 | 5252  | 3582 | 3125 | 4012 |
| NM_013509    | Eno2          | 1.094  | -1.507 | 2525 | 4606 | 3974  | 939  | 429  | 254  |
| NM_023348    | Snap29        | -0.984 | -1.501 | 4329 | 3844 | 4594  | 712  | 689  | 525  |
| NM_198862    | Nlgn2         | -0.725 | -1.495 | 3236 | 296  | 414   | 1945 | 448  | 358  |
| NM_183171    | Fez1          | 1.131  | -1.493 | 252  | 257  | 255   | 1283 | 716  | 817  |
| NM_017380    | Sept9         | 0.675  | -1.490 | 1758 | 1709 | 1610  | 1182 | 817  | 492  |
| NM_009938    | Copa          | -0.644 | -1.488 | 4908 | 6768 | 6812  | 908  | 893  | 939  |
| NM_013630    | Pkd1          | -0.180 | -1.487 | 4938 | 5619 | 6066  | 1761 | 1665 | 1045 |
| NM_013863    | Bag3          | -0.131 | -1.483 | 3573 | 5486 | 4808  | 1023 | 728  | 426  |
| NM_172261    | Ppp1r9b       | -0.573 | -1.481 | 4186 | 6430 | 8767  | 1724 | 549  | 354  |
| NM_145516    | Plekhb2       | -0.573 | -1.480 | 1310 | 1809 | 3016  | 1344 | 1096 | 779  |



|              |               |        |        |       |      |       |      |      |      |
|--------------|---------------|--------|--------|-------|------|-------|------|------|------|
| NM_138315    | Mical1        | -0.466 | -1.479 | 2394  | 4040 | 5097  | 1032 | 333  | 279  |
| NM_001037878 | Tcf25         | -0.862 | -1.477 | 4549  | 4070 | 7965  | 862  | 546  | 1279 |
| NM_025982    | Sas           | 0.034  | -1.475 | 3473  | 6932 | 3869  | 74   | 141  | 131  |
| NM_008749    | Nucb1         | -0.761 | -1.475 | 1595  | 1958 | 2086  | 468  | 420  | 189  |
| NM_029148    | Txndc13       | 0.690  | -1.474 | 1609  | 2671 | 2976  | 755  | 437  | 1109 |
| NM_019914    | Mllt11        | 1.084  | -1.474 | 3915  | 7137 | 4377  | 161  | 383  | 84   |
| NM_008853    | Pja1          | -0.157 | -1.473 | 1236  | 1859 | 2313  | 143  | 97   | 65   |
| NM_001081979 | Mecp2         | 0.550  | -1.473 | 2720  | 3041 | 2953  | 485  | 818  | 759  |
| NM_026617    | Tmbim4        | -0.857 | -1.470 | 3253  | 4305 | 3268  | 361  | 555  | 431  |
| NM_020003    | 0610031J06Rik | -0.888 | -1.470 | 3734  | 3129 | 2979  | 49   | 72   | 37   |
| NM_198602    | Cux1          | 0.284  | -1.470 | 10315 | 9798 | 12048 | 9133 | 7586 | 7347 |
| NM_013755    | Gyg           | -0.144 | -1.469 | 2013  | 2561 | 2648  | 1710 | 800  | 421  |
| NM_010360    | Gstm5         | -0.497 | -1.468 | 527   | 2026 | 1272  | 539  | 30   | 25   |
| NM_011026    | P2rx4         | -0.751 | -1.468 | 3338  | 3689 | 2262  | 656  | 437  | 175  |
| NM_174857    | Mamdc2        | -0.873 | -1.464 | 1461  | 3156 | 3371  | 7800 | 6335 | 8891 |
| NM_021292    | Evc           | -0.177 | -1.463 | 2028  | 3350 | 3047  | 1926 | 1035 | 558  |
| NM_029239    | Prkd3         | 0.082  | -1.462 | 571   | 791  | 635   | 1014 | 1475 | 1889 |
| NM_007920    | Elf1          | -0.102 | -1.462 | 5264  | 5995 | 7730  | 2500 | 2147 | 2350 |
| NM_133749    | 2900064A13Rik | -0.604 | -1.462 | 3991  | 3288 | 3963  | 285  | 84   | 221  |
| NM_030750    | Sgpp1         | -0.727 | -1.459 | 3945  | 6114 | 3951  | 1265 | 745  | 418  |
| NM_008898    | Por           | 0.099  | -1.458 | 4511  | 5082 | 5511  | 1426 | 1128 | 699  |
| NM_026418    | Rgs10         | -0.610 | -1.457 | 3178  | 1774 | 2393  | 3365 | 1413 | 1332 |
| NM_001001144 | Scap          | -0.607 | -1.456 | 3743  | 2884 | 4141  | 1742 | 994  | 1159 |
| NM_029862    | 5930434B04Rik | -0.962 | -1.453 | 2177  | 2819 | 4294  | 363  | 282  | 233  |
| NM_021493    | 4933428G20Rik | -0.904 | -1.449 | 4963  | 2528 | 4695  | 3438 | 1342 | 1104 |
| NM_172447    | A330021E22Rik | -0.601 | -1.448 | 2688  | 2918 | 1556  | 1964 | 1612 | 1007 |
| NM_020050    | Tmem9b        | -0.160 | -1.445 | 3880  | 4072 | 3677  | 732  | 347  | 183  |
| NM_175134    | Ankrd46       | -0.297 | -1.443 | 2695  | 2881 | 3211  | 498  | 648  | 608  |
| NM_021518    | Rab2a         | 0.653  | -1.442 | 3252  | 5779 | 2957  | 863  | 1403 | 841  |

|              |               |        |        |      |       |       |       |       |       |
|--------------|---------------|--------|--------|------|-------|-------|-------|-------|-------|
| NM_008359    | Il17ra        | -0.622 | -1.440 | 2578 | 4023  | 5579  | 1268  | 910   | 310   |
| NM_145495    | Rin1          | 1.331  | -1.440 | 1822 | 6776  | 5216  | 560   | 232   | 186   |
| NM_011893    | Sh3bp2        | 1.613  | -1.440 | 3287 | 5334  | 4311  | 2651  | 1095  | 383   |
| NM_007897    | Ebf1          | -0.611 | -1.440 | 4740 | 8849  | 14760 | 26777 | 11871 | 10676 |
| NM_013758    | Add3          | -0.071 | -1.440 | 2151 | 2946  | 3887  | 2622  | 2505  | 2682  |
| NM_144794    | Tmem63a       | -0.240 | -1.439 | 2490 | 3877  | 4376  | 1900  | 864   | 823   |
| NM_178761    | Zfp672        | -0.329 | -1.438 | 4168 | 2331  | 3333  | 1028  | 213   | 215   |
| NM_198411    | 2610204M08Rik | 1.139  | -1.437 | 2604 | 5678  | 4463  | 2431  | 922   | 276   |
| NM_013497    | Creb3         | -0.374 | -1.434 | 2624 | 5570  | 3424  | 138   | 110   | 102   |
| NM_008969    | Ptgs1         | -0.595 | -1.432 | 603  | 2409  | 2758  | 1651  | 1247  | 552   |
| NM_023063    | Lima1         | 0.157  | -1.431 | 728  | 12174 | 7628  | 826   | 1003  | 849   |
| NM_026170    | Ergic1        | -0.363 | -1.430 | 4614 | 6240  | 5993  | 2423  | 3742  | 2226  |
| NM_026911    | Spcs1         | -0.361 | -1.429 | 5477 | 4481  | 5345  | 201   | 102   | 49    |
| NM_177648    | Dolk          | -0.592 | -1.429 | 7494 | 4736  | 6758  | 96    | 154   | 52    |
| NM_011925    | Cd97          | -0.588 | -1.429 | 1492 | 3370  | 4047  | 440   | 366   | 365   |
| NM_009105    | Rsu1          | -0.379 | -1.428 | 2335 | 4431  | 4436  | 3994  | 2694  | 4191  |
| NM_133187    | 1110032E23Rik | 1.902  | -1.427 | 532  | 10719 | 3016  | 1679  | 901   | 790   |
| NM_009686    | Apbb2         | 0.312  | -1.427 | 8572 | 7472  | 5742  | 8259  | 6372  | 3381  |
| NM_008549    | Man2a1        | -0.507 | -1.426 | 4457 | 9238  | 8354  | 3660  | 4875  | 4309  |
| NM_031373    | Ogfr          | -0.835 | -1.425 | 3546 | 5114  | 5395  | 361   | 180   | 168   |
| NM_008663    | Myo7a         | 0.229  | -1.422 | 1491 | 1908  | 2832  | 5105  | 1942  | 823   |
| NM_001001566 | Chpf          | -0.994 | -1.419 | 2917 | 2896  | 4316  | 453   | 326   | 861   |
| NM_178760    | Gpr107        | -0.838 | -1.419 | 3865 | 4795  | 5627  | 1592  | 1463  | 1323  |
| NM_008980    | Ptpra         | -0.507 | -1.418 | 3373 | 4017  | 5254  | 2723  | 1509  | 2296  |
| NM_009610    | Actg2         | 2.007  | -1.415 | 245  | 489   | 264   | 1343  | 1661  | 1785  |
| NM_173397    | D930001I22Rik | -0.251 | -1.415 | 3104 | 3239  | 3459  | 187   | 115   | 111   |
| NM_026819    | Dhrs1         | -0.087 | -1.415 | 2924 | 3085  | 3802  | 149   | 88    | 201   |
| NM_020618    | Smarce1       | -0.382 | -1.414 | 4190 | 5008  | 5926  | 597   | 362   | 618   |
| NM_025911    | Ccdc91        | -0.196 | -1.411 | 3193 | 5690  | 4636  | 3470  | 5005  | 3966  |

|              |               |        |        |      |       |       |       |       |      |
|--------------|---------------|--------|--------|------|-------|-------|-------|-------|------|
| NM_016860    | Actr1a        | 0.109  | -1.409 | 3406 | 4385  | 4250  | 510   | 535   | 339  |
| NM_001013380 | Dync1li2      | 0.199  | -1.409 | 4755 | 5050  | 6367  | 591   | 534   | 507  |
| NM_008548    | Man1a         | -0.989 | -1.407 | 4069 | 6348  | 9989  | 5319  | 3586  | 4761 |
| NM_011866    | Pde10a        | 0.012  | -1.405 | 4882 | 6390  | 9091  | 9878  | 15998 | 5181 |
| NM_016965    | Nckap1        | 0.279  | -1.404 | 3855 | 5453  | 5075  | 1210  | 1028  | 1804 |
| NM_198113    | Ssh3          | -0.959 | -1.403 | 1653 | 1379  | 3793  | 600   | 501   | 195  |
| NM_028846    | Usp20         | -0.203 | -1.399 | 508  | 281   | 341   | 1052  | 468   | 495  |
| NM_020296    | Rbms1         | -0.105 | -1.399 | 7142 | 13542 | 13934 | 6215  | 3782  | 4930 |
| NM_145629    | Pls3          | -0.714 | -1.398 | 1686 | 2787  | 3123  | 843   | 845   | 911  |
| NM_207215    | Mycbp2        | -0.826 | -1.398 | 3356 | 4353  | 9029  | 4113  | 4040  | 6318 |
| NM_026669    | Tmbim6        | -0.110 | -1.397 | 3179 | 7633  | 5761  | 345   | 564   | 441  |
| NM_029924    | Mbd5          | -0.342 | -1.397 | 4182 | 7049  | 8052  | 6516  | 4156  | 8003 |
| NM_033475    | Rab34         | -0.665 | -1.396 | 4245 | 4116  | 4742  | 198   | 175   | 509  |
| NM_010345    | Grb10         | 0.030  | -1.396 | 4252 | 3192  | 3931  | 10065 | 5324  | 8377 |
| NM_172605    | Tdrd3         | -0.325 | -1.394 | 4040 | 4842  | 5689  | 2476  | 2241  | 3163 |
| NM_028766    | Tmem43        | -0.072 | -1.393 | 5386 | 7229  | 6564  | 610   | 759   | 310  |
| NM_146012    | Ctdsp2        | -0.335 | -1.393 | 89   | 62    | 58    | 67    | 80    | 75   |
| NM_153088    | Ctdsp1        | -0.657 | -1.387 | 3392 | 3677  | 5562  | 909   | 438   | 612  |
| NM_023912    | Scyl1         | -0.611 | -1.387 | 2909 | 4007  | 5157  | 465   | 259   | 212  |
| NM_031494    | Zfp275        | -0.072 | -1.386 | 2011 | 1947  | 2759  | 218   | 344   | 213  |
| NM_011448    | Sox9          | -0.436 | -1.384 | 3285 | 3446  | 6346  | 2545  | 324   | 391  |
| NM_025576    | 2810004N20Rik | -0.345 | -1.383 | 2574 | 4163  | 5174  | 213   | 63    | 197  |
| NM_009073    | Rom1          | -0.972 | -1.383 | 2344 | 1931  | 3354  | 161   | 204   | 90   |
| NM_016920    | Atp6v0a1      | -0.364 | -1.382 | 1933 | 2615  | 2164  | 2010  | 1505  | 1419 |
| NM_022419    | Abhd8         | -0.815 | -1.382 | 3363 | 3722  | 5758  | 1389  | 251   | 272  |
| NM_181585    | Pik3r3        | 0.449  | -1.381 | 1954 | 4740  | 2329  | 1901  | 1504  | 911  |
| NM_028521    | Phospho2      | -0.673 | -1.376 | 1651 | 2717  | 2752  | 206   | 109   | 202  |
| NM_009875    | Cdkn1b        | -0.147 | -1.373 | 4912 | 13259 | 8916  | 455   | 151   | 76   |
| NM_011050    | Pdcd4         | -0.946 | -1.370 | 2941 | 5855  | 5423  | 1348  | 1298  | 1065 |

|           |            |        |        |      |       |       |      |      |      |
|-----------|------------|--------|--------|------|-------|-------|------|------|------|
| NM_013876 | Rnf11      | 0.796  | -1.370 | 3676 | 6738  | 3302  | 491  | 719  | 325  |
| NM_026254 | Tbc1d23    | -0.956 | -1.367 | 2564 | 3007  | 3635  | 1045 | 1107 | 1333 |
| NM_008994 | Pex2       | 1.133  | -1.367 | 2444 | 4746  | 2920  | 600  | 294  | 223  |
| NM_029561 | Ndfip2     | -0.006 | -1.364 | 1745 | 2664  | 3401  | 1099 | 961  | 1182 |
| NM_080553 | Itpr3      | 0.267  | -1.363 | 5467 | 6746  | 7386  | 2186 | 2112 | 1322 |
| NM_027920 | March8     | -0.174 | -1.362 | 2958 | 4329  | 3554  | 1804 | 2292 | 1749 |
| NM_025730 | Lrrk2      | 1.501  | -1.360 | 969  | 7548  | 4369  | 5489 | 4005 | 4144 |
| NM_019829 | Stx5a      | -0.560 | -1.358 | 3034 | 3951  | 5402  | 333  | 289  | 319  |
| NM_172557 | Rufy1      | -0.468 | -1.357 | 3438 | 2576  | 2882  | 1595 | 1347 | 1128 |
| NM_133710 | Ctdspl     | -0.358 | -1.354 | 4313 | 3861  | 6794  | 6658 | 2278 | 2179 |
| NM_029836 | DXBwg1396e | -0.331 | -1.352 | 1388 | 2330  | 2926  | 123  | 119  | 51   |
| NM_133926 | Camk1      | 0.088  | -1.352 | 986  | 3464  | 3168  | 269  | 663  | 299  |
| NM_133978 | Cmtm7      | -0.991 | -1.351 | 3157 | 3773  | 5791  | 650  | 522  | 364  |
| NM_198103 | Exoc8      | -0.472 | -1.350 | 6350 | 6280  | 11030 | 269  | 176  | 211  |
| NM_178772 | Aadacl1    | 2.152  | -1.347 | 2970 | 5218  | 3072  | 1725 | 1432 | 839  |
| NM_013691 | Thbs3      | -0.804 | -1.345 | 2957 | 1843  | 1893  | 522  | 438  | 181  |
| NM_175266 | Epm2aip1   | -0.511 | -1.340 | 5086 | 8095  | 8453  | 219  | 148  | 219  |
| NM_019642 | Rpn2       | -0.598 | -1.337 | 5113 | 4098  | 5229  | 775  | 896  | 755  |
| NM_178592 | Bat5       | -0.902 | -1.336 | 2033 | 2829  | 3005  | 363  | 606  | 364  |
| NM_008138 | Gnai2      | 0.018  | -1.335 | 4795 | 8115  | 10736 | 807  | 524  | 245  |
| NM_029019 | Stard6     | -0.266 | -1.333 | 2775 | 2761  | 3440  | 476  | 385  | 495  |
| NM_028173 | Tram1      | -0.995 | -1.332 | 3203 | 3777  | 4975  | 619  | 572  | 614  |
| NM_015807 | Nt5c       | -0.988 | -1.329 | 2175 | 2368  | 3332  | 101  | 91   | 40   |
| NM_022410 | Myh9       | 0.152  | -1.328 | 8284 | 13399 | 12904 | 2324 | 2698 | 1903 |
| NM_022309 | Cbfb       | 0.391  | -1.327 | 4171 | 5785  | 5589  | 926  | 883  | 847  |
| NM_145220 | Appl2      | -0.302 | -1.326 | 3704 | 5876  | 4421  | 1169 | 1343 | 1096 |
| NM_024189 | Yaf2       | 0.295  | -1.323 | 3066 | 4498  | 4002  | 2543 | 1433 | 1467 |
| NM_029761 | Dok5       | -0.045 | -1.323 | 1724 | 2104  | 4319  | 8528 | 2814 | 4110 |
| NM_173392 | Zfyve16    | -0.198 | -1.322 | 2518 | 4333  | 4519  | 1128 | 1091 | 1137 |

|              |               |        |        |      |      |      |      |      |      |
|--------------|---------------|--------|--------|------|------|------|------|------|------|
| NM_029922    | Parp6         | -0.312 | -1.315 | 1749 | 2993 | 3239 | 704  | 547  | 736  |
| NM_025620    | 2210417D09Rik | -0.420 | -1.312 | 43   | 51   | 23   | 94   | 162  | 112  |
| NM_133771    | Memo1         | 0.277  | -1.311 | 5180 | 7068 | 6266 | 1685 | 2498 | 2549 |
| NM_153538    | Zcchc6        | -0.286 | -1.310 | 3753 | 3467 | 5332 | 1160 | 1394 | 1468 |
| NM_133673    | Tor1b         | -0.829 | -1.310 | 2641 | 2725 | 3490 | 174  | 124  | 128  |
| NM_019955    | Ripk3         | -0.691 | -1.309 | 945  | 1711 | 3323 | 868  | 744  | 87   |
| NM_175300    | Anapc2        | -0.952 | -1.306 | 5006 | 5517 | 7109 | 327  | 220  | 189  |
| NM_178597    | Camk2g        | -0.148 | -1.301 | 4842 | 4227 | 5661 | 1814 | 1735 | 1671 |
| NM_016666    | Aip           | -0.997 | -1.299 | 2638 | 3883 | 4089 | 337  | 440  | 320  |
| NM_001047433 | Dph3          | -0.281 | -1.299 | 2776 | 3054 | 2935 | 300  | 80   | 189  |
| NM_011990    | Slc7a11       | 2.527  | -1.295 | 223  | 2204 | 706  | 2361 | 1642 | 1110 |
| NM_053083    | Loxl4         | -0.814 | -1.295 | 680  | 1348 | 2318 | 1586 | 808  | 407  |
| NM_013870    | Smtn          | -0.445 | -1.292 | 4432 | 4960 | 5778 | 1300 | 697  | 495  |
| NM_173863    | Crtc3         | -0.022 | -1.291 | 4081 | 4091 | 4530 | 4403 | 1563 | 1007 |
| NM_138583    | D16H22S680E   | -0.806 | -1.290 | 273  | 208  | 228  | 910  | 621  | 510  |
| NM_175160    | Zdhhc1        | -0.565 | -1.289 | 2847 | 3296 | 3644 | 2039 | 787  | 456  |
| NM_028117    | Chst14        | -0.507 | -1.289 | 2151 | 3460 | 4898 | 381  | 10   | 33   |
| NM_146145    | Jak1          | -0.180 | -1.284 | 4378 | 5849 | 4350 | 3366 | 2628 | 1662 |
| NM_001024458 | Add1          | 0.436  | -1.283 | 3693 | 5633 | 3546 | 1250 | 1343 | 509  |
| NM_001081161 | Fam171a1      | -0.416 | -1.281 | 2881 | 3232 | 4687 | 4319 | 2068 | 2538 |
| NM_009338    | Acat2         | -0.343 | -1.281 | 4429 | 2536 | 3317 | 283  | 389  | 356  |
| NM_025964    | Fam119a       | -0.639 | -1.280 | 4275 | 5489 | 5391 | 597  | 96   | 406  |
| NM_025646    | Crls1         | 0.077  | -1.279 | 2002 | 3247 | 3182 | 449  | 363  | 463  |
| NM_175101    | Tmem111       | -0.162 | -1.274 | 3406 | 5671 | 3769 | 276  | 692  | 432  |
| NM_008854    | Prkaca        | -0.798 | -1.272 | 3945 | 4272 | 8238 | 993  | 599  | 635  |
| NM_001081156 | 2300002D11Rik | -0.148 | -1.271 | 2724 | 2420 | 1500 | 1327 | 1654 | 432  |
| NM_009045    | Rela          | -0.046 | -1.271 | 3840 | 3840 | 4668 | 296  | 466  | 243  |
| NM_026047    | Rnf219        | 0.037  | -1.270 | 1375 | 2605 | 3362 | 2058 | 1053 | 1239 |
| NM_007916    | Ddx19a        | -0.018 | -1.270 | 3998 | 3667 | 3606 | 316  | 326  | 341  |

|           |               |        |        |      |      |      |       |       |       |
|-----------|---------------|--------|--------|------|------|------|-------|-------|-------|
| NM_013757 | Sytl4         | -0.600 | -1.270 | 478  | 660  | 2032 | 1221  | 1439  | 801   |
| NM_011658 | Twist1        | 0.079  | -1.268 | 4280 | 6070 | 3863 | 866   | 335   | 282   |
| NM_029432 | 4930402H24Rik | 0.262  | -1.268 | 5202 | 5783 | 6575 | 2847  | 2320  | 2655  |
| NM_010140 | Epha3         | -0.743 | -1.265 | 2659 | 3469 | 4295 | 9717  | 7442  | 16083 |
| NM_011366 | Sorbs3        | -0.245 | -1.264 | 1875 | 4949 | 8450 | 3249  | 549   | 493   |
| NM_022331 | Herpud1       | -0.053 | -1.262 | 6206 | 7755 | 7493 | 246   | 164   | 203   |
| NM_025829 | Eif4e3        | 1.007  | -1.261 | 2005 | 4491 | 3528 | 3891  | 2535  | 1430  |
| NM_171826 | Cldnd1        | 0.074  | -1.259 | 1640 | 2381 | 2424 | 164   | 153   | 221   |
| NM_178066 | 1110012D08Rik | 0.740  | -1.257 | 4434 | 8283 | 5719 | 280   | 245   | 104   |
| NM_176837 | Arhgap18      | -0.031 | -1.256 | 1083 | 2541 | 2680 | 4704  | 3067  | 4008  |
| NM_009357 | Tex261        | 0.333  | -1.253 | 3149 | 5452 | 4671 | 304   | 255   | 100   |
| NM_033565 | Aff4          | -0.437 | -1.250 | 4712 | 5140 | 5211 | 1744  | 1776  | 1774  |
| NM_010753 | Mxd4          | -0.686 | -1.250 | 3856 | 4591 | 5071 | 1262  | 487   | 67    |
| NM_010329 | Gp38          | -0.537 | -1.248 | 2993 | 4684 | 4892 | 682   | 1096  | 276   |
| NM_019980 | Litaf         | -0.042 | -1.245 | 3948 | 7598 | 6151 | 703   | 929   | 591   |
| NM_153578 | Nipa1         | 0.068  | -1.245 | 3120 | 2711 | 2811 | 1724  | 790   | 702   |
| NM_182994 | Arl5a         | 0.484  | -1.243 | 3138 | 8410 | 3833 | 464   | 584   | 460   |
| NM_019390 | Lmna          | 1.261  | -1.241 | 1315 | 1980 | 879  | 1101  | 239   | 64    |
| NM_134094 | Ncald         | 1.136  | -1.241 | 4699 | 8422 | 6002 | 19805 | 25301 | 15252 |
| NM_175446 | Zmat1         | 0.000  | -1.240 | 839  | 1401 | 1255 | 1025  | 583   | 556   |
| NM_145568 | Krcc1         | 0.590  | -1.240 | 3575 | 5735 | 3749 | 274   | 390   | 300   |
| NM_133732 | 4931406C07Rik | -0.579 | -1.239 | 103  | 160  | 201  | 429   | 295   | 376   |
| NM_172772 | B230380D07Rik | 0.180  | -1.236 | 4008 | 5441 | 5729 | 1636  | 929   | 1482  |
| NM_020611 | Srd5a3        | 0.279  | -1.235 | 2386 | 3411 | 1778 | 413   | 347   | 148   |
| NM_026760 | 2310036O22Rik | -0.515 | -1.231 | 3188 | 3479 | 5164 | 109   | 100   | 166   |
| NM_026139 | Armcx2        | 0.499  | -1.229 | 1009 | 2377 | 2558 | 153   | 50    | 48    |
| NM_015817 | Ppap2c        | -0.390 | -1.228 | 2376 | 2214 | 3542 | 417   | 290   | 268   |
| NM_025976 | Bfar          | -0.916 | -1.228 | 4346 | 3604 | 4205 | 516   | 594   | 716   |
| NM_013471 | Anxa4         | 0.093  | -1.224 | 2657 | 5222 | 4404 | 2059  | 1715  | 1316  |

|              |               |        |        |      |       |      |      |      |      |
|--------------|---------------|--------|--------|------|-------|------|------|------|------|
| NM_021494    | Dennd5a       | 1.034  | -1.221 | 3209 | 5084  | 2686 | 1336 | 1310 | 711  |
| NM_007498    | Atf3          | 1.749  | -1.220 | 4801 | 6138  | 4544 | 2547 | 323  | 816  |
| NM_008013    | Fgl2          | -0.977 | -1.219 | 339  | 986   | 1535 | 670  | 225  | 210  |
| NM_053273    | Ttyh2         | -0.627 | -1.218 | 4631 | 4850  | 6350 | 2002 | 1756 | 1269 |
| NM_028000    | Ppapdc1b      | -0.273 | -1.218 | 2850 | 2230  | 2150 | 124  | 229  | 104  |
| NM_001004164 | Gnptab        | -0.472 | -1.217 | 3205 | 5373  | 5039 | 2053 | 1394 | 1824 |
| NM_008621    | Mpp1          | -0.762 | -1.216 | 1324 | 2346  | 2662 | 205  | 316  | 313  |
| NM_016903    | Esd           | -0.243 | -1.215 | 2141 | 3349  | 3903 | 328  | 428  | 512  |
| NM_011657    | Tulp3         | 0.314  | -1.215 | 2873 | 4993  | 3387 | 661  | 868  | 540  |
| NM_011930    | Clcn7         | -0.499 | -1.213 | 3261 | 4252  | 3820 | 808  | 875  | 757  |
| NM_145984    | D030028O16Rik | 0.089  | -1.212 | 4267 | 5289  | 4823 | 703  | 728  | 824  |
| NM_010320    | Gng8          | 0.275  | -1.210 | 202  | 1122  | 454  | 673  | 146  | 122  |
| NM_178644    | Oaf           | -0.402 | -1.210 | 1826 | 6954  | 7865 | 2686 | 296  | 230  |
| NM_053014    | Agpat3        | -0.235 | -1.209 | 2933 | 3233  | 4011 | 4417 | 2160 | 1970 |
| NM_012060    | Bcap31        | -0.709 | -1.203 | 1932 | 2462  | 3457 | 247  | 504  | 303  |
| NM_026172    | Decr1         | 0.064  | -1.203 | 1670 | 2421  | 1731 | 794  | 643  | 670  |
| NM_011631    | Hsp90b1       | -0.156 | -1.202 | 4770 | 8556  | 6418 | 152  | 511  | 318  |
| NM_022018    | Fam129a       | 0.560  | -1.202 | 2788 | 4214  | 5447 | 4933 | 3679 | 4193 |
| NM_025272    | Atp6v0e       | -0.575 | -1.201 | 2684 | 4502  | 3664 | 721  | 1079 | 482  |
| NM_010431    | Hif1a         | -0.679 | -1.198 | 4549 | 6778  | 5479 | 760  | 875  | 676  |
| NM_026416    | S100a16       | -0.305 | -1.198 | 130  | 320   | 651  | 135  | 110  | 61   |
| NM_019777    | Ikbke         | -0.670 | -1.196 | 274  | 1546  | 4664 | 3254 | 1563 | 716  |
| NM_030692    | Sacm1l        | -0.022 | -1.194 | 3464 | 4424  | 4893 | 1130 | 1048 | 1481 |
| NM_007737    | Col5a2        | 0.141  | -1.192 | 310  | 14315 | 7495 | 3307 | 2373 | 4192 |
| NM_145496    | Dak           | -0.271 | -1.192 | 1674 | 1464  | 1840 | 252  | 254  | 285  |
| NM_134029    | Nt5m          | -0.035 | -1.190 | 3090 | 3142  | 3903 | 1477 | 579  | 637  |
| NM_178900    | Prkd2         | -0.518 | -1.189 | 1518 | 3137  | 4016 | 1485 | 334  | 263  |
| NM_027352    | Gorasp2       | -0.456 | -1.187 | 4377 | 5636  | 6173 | 478  | 489  | 711  |
| NM_001077638 | Prmt2         | 0.077  | -1.185 | 2076 | 3028  | 3546 | 1022 | 825  | 671  |

|              |               |        |        |      |       |      |       |      |      |
|--------------|---------------|--------|--------|------|-------|------|-------|------|------|
| NM_144500    | Osbp12        | -0.455 | -1.182 | 3095 | 4210  | 5183 | 1159  | 710  | 983  |
| NM_022432    | Sirt2         | 0.461  | -1.182 | 2253 | 3224  | 2415 | 715   | 422  | 210  |
| NM_008917    | Ppt1          | 0.296  | -1.179 | 1771 | 2108  | 1575 | 354   | 556  | 382  |
| NM_007569    | Btg1          | 0.671  | -1.177 | 4441 | 15795 | 7285 | 167   | 254  | 109  |
| NM_007746    | Map3k8        | -0.605 | -1.176 | 1746 | 3384  | 4941 | 1514  | 573  | 726  |
| NM_001033172 | Rab11fip2     | -0.181 | -1.175 | 2176 | 3792  | 4041 | 1219  | 1048 | 1397 |
| NM_024454    | Rab21         | 0.336  | -1.175 | 4311 | 9289  | 5733 | 951   | 747  | 572  |
| NM_133201    | Mfn2          | 0.706  | -1.175 | 3413 | 3605  | 2365 | 536   | 539  | 395  |
| NM_028132    | Pgm2          | 0.106  | -1.174 | 3986 | 4628  | 3311 | 1652  | 1255 | 708  |
| NM_027309    | Lysmd2        | -0.725 | -1.173 | 4087 | 1939  | 3781 | 824   | 378  | 237  |
| NM_133753    | Errfi1        | 0.738  | -1.171 | 1388 | 4827  | 2918 | 613   | 370  | 196  |
| NM_181516    | Taz           | -0.267 | -1.171 | 2066 | 2532  | 2886 | 107   | 194  | 72   |
| NM_010434    | Hipk3         | -0.566 | -1.169 | 3740 | 4659  | 6812 | 1524  | 1067 | 1281 |
| NM_025674    | Tcf19         | 1.295  | -1.164 | 1111 | 4234  | 4292 | 155   | 230  | 115  |
| NM_010176    | Fah           | -0.914 | -1.163 | 1677 | 2099  | 1876 | 899   | 491  | 377  |
| NM_019727    | Snx1          | -0.366 | -1.158 | 2309 | 4204  | 4385 | 964   | 507  | 909  |
| NM_001081241 | 2310066E14Rik | -0.375 | -1.157 | 4901 | 6076  | 9284 | 1207  | 466  | 365  |
| NM_028019    | Rnf135        | -0.707 | -1.155 | 3523 | 3437  | 3355 | 525   | 411  | 462  |
| NM_176785    | Hps6          | -0.339 | -1.154 | 2861 | 3252  | 4152 | 191   | 109  | 72   |
| NM_027219    | Cdc42ep1      | 0.090  | -1.152 | 1179 | 7626  | 6900 | 1382  | 235  | 168  |
| NM_010073    | Dpm2          | -0.540 | -1.152 | 2353 | 2721  | 3682 | 86    | 46   | 104  |
| NM_021435    | Slc35b4       | 0.062  | -1.148 | 2764 | 4775  | 3585 | 547   | 630  | 474  |
| NM_023908    | Slco3a1       | -0.814 | -1.148 | 3658 | 3504  | 4697 | 10256 | 7895 | 3715 |
| NM_025588    | Exoc2         | -0.110 | -1.147 | 3730 | 3818  | 4555 | 3186  | 3677 | 4778 |
| NM_021457    | Fzd1          | -0.918 | -1.147 | 4817 | 4947  | 4747 | 1284  | 84   | 203  |
| NM_027773    | 2310047D13Rik | 0.032  | -1.144 | 3346 | 2549  | 3063 | 1026  | 298  | 150  |
| NM_029884    | Hgsnat        | 0.283  | -1.144 | 2344 | 3113  | 2147 | 733   | 514  | 265  |
| NM_019657    | Hsd17b12      | -0.022 | -1.143 | 4679 | 5906  | 4843 | 2222  | 2436 | 3443 |
| NM_029657    | Mgrn1         | -0.606 | -1.142 | 3864 | 3356  | 4984 | 1458  | 1348 | 1079 |



|              |          |        |        |       |       |      |       |       |      |
|--------------|----------|--------|--------|-------|-------|------|-------|-------|------|
| NM_029789    | Lass2    | 0.819  | -1.139 | 3962  | 4989  | 3842 | 186   | 125   | 95   |
| NM_177757    | Kif26b   | -0.637 | -1.139 | 840   | 357   | 639  | 4238  | 1836  | 1740 |
| NM_008615    | Mod1     | -0.466 | -1.138 | 3123  | 3264  | 4348 | 2764  | 1869  | 2430 |
| NM_015828    | Gne      | -0.633 | -1.138 | 5381  | 3911  | 3761 | 1992  | 1868  | 661  |
| NM_001042534 | Capg     | 0.469  | -1.137 | 311   | 3360  | 3076 | 641   | 508   | 194  |
| NM_019776    | Snd1     | -0.221 | -1.136 | 10805 | 13588 | 9325 | 11580 | 11862 | 9780 |
| NM_145920    | Evc2     | 0.049  | -1.134 | 1543  | 2890  | 2772 | 2692  | 1570  | 1005 |
| NM_133656    | Crk      | 0.283  | -1.134 | 5259  | 4274  | 5079 | 729   | 753   | 592  |
| NM_172843    | Tor1aip2 | -0.638 | -1.134 | 179   | 215   | 67   | 305   | 280   | 304  |
| NM_019713    | Rassf1   | 0.719  | -1.133 | 3080  | 7652  | 7219 | 360   | 187   | 190  |
| NM_024206    | Sec13    | 0.189  | -1.132 | 3635  | 5976  | 4580 | 268   | 338   | 214  |
| NM_008551    | Mapkapk2 | -0.009 | -1.132 | 4507  | 5217  | 7658 | 2383  | 955   | 973  |
| NM_172442    | Dtx4     | 0.303  | -1.132 | 4274  | 5153  | 4778 | 2578  | 1160  | 1156 |
| NM_016963    | Tmod3    | -0.783 | -1.131 | 4359  | 3929  | 5283 | 1232  | 957   | 1196 |
| NM_013761    | Srr      | -0.395 | -1.130 | 3991  | 4224  | 4154 | 522   | 641   | 574  |
| NM_016740    | S100a11  | 0.474  | -1.129 | 1404  | 6254  | 2984 | 68    | 120   | 60   |
| NM_026221    | Ppfibp1  | 0.300  | -1.128 | 3240  | 11521 | 8152 | 3701  | 3339  | 3256 |
| NM_029956    | Mmab     | -0.012 | -1.128 | 2548  | 2742  | 2284 | 396   | 300   | 217  |
| NM_028015    | Lass5    | -0.353 | -1.126 | 3330  | 4885  | 4350 | 947   | 903   | 976  |
| NM_009658    | Akr1b3   | -0.726 | -1.124 | 1941  | 4818  | 3635 | 508   | 477   | 219  |
| NM_013770    | Slc25a10 | 0.588  | -1.124 | 4512  | 2703  | 3897 | 349   | 230   | 120  |
| NM_181588    | Cdbl     | -0.224 | -1.123 | 178   | 480   | 306  | 919   | 690   | 541  |
| NM_145575    | Cald1    | 0.285  | -1.119 | 1841  | 9570  | 5653 | 2376  | 2031  | 1532 |
| NM_019750    | Nat6     | -0.078 | -1.118 | 1396  | 3133  | 3221 | 191   | 134   | 100  |
| NM_173413    | Rab8b    | 0.679  | -1.118 | 2309  | 3622  | 3727 | 2446  | 1434  | 1713 |
| NM_013785    | Ihpk1    | -0.273 | -1.117 | 5622  | 5646  | 6707 | 719   | 772   | 689  |
| NM_009506    | Vegfc    | 1.062  | -1.116 | 3106  | 4432  | 2992 | 1535  | 1699  | 1670 |
| NM_025340    | Sharpin  | -0.296 | -1.113 | 5787  | 6794  | 7410 | 122   | 170   | 141  |
| NM_146234    | Tmem32   | 0.302  | -1.112 | 2714  | 1630  | 2406 | 148   | 92    | 154  |

|              |               |        |        |      |      |      |       |       |       |
|--------------|---------------|--------|--------|------|------|------|-------|-------|-------|
| NM_009758    | Bmpr1a        | -0.516 | -1.112 | 4871 | 5981 | 6026 | 1741  | 1803  | 5053  |
| NM_001012667 | AI316807      | 0.397  | -1.111 | 3451 | 3604 | 2435 | 470   | 338   | 147   |
| NM_011868    | Peci          | -0.654 | -1.109 | 1716 | 2385 | 2726 | 389   | 517   | 448   |
| NM_019953    | Cnpy2         | -0.942 | -1.108 | 3944 | 5866 | 4647 | 117   | 187   | 158   |
| NM_010470    | Hp1bp3        | 1.060  | -1.108 | 7243 | 6759 | 4496 | 482   | 689   | 192   |
| NM_144560    | Gas2l1        | -0.143 | -1.108 | 4965 | 4208 | 5144 | 885   | 265   | 265   |
| NM_025813    | Mfsd1         | -0.012 | -1.107 | 2107 | 3505 | 2638 | 894   | 331   | 165   |
| NM_016921    | Tcirg1        | -0.420 | -1.106 | 780  | 2158 | 3001 | 509   | 208   | 181   |
| NM_134135    | Slc39a3       | -0.220 | -1.102 | 769  | 132  | 125  | 569   | 396   | 153   |
| NM_026155    | Ssr3          | 0.673  | -1.102 | 2868 | 5271 | 3058 | 245   | 227   | 150   |
| NM_009057    | Rag1ap1       | -0.463 | -1.101 | 404  | 1576 | 1251 | 174   | 173   | 31    |
| NM_010167    | Eya4          | -0.330 | -1.099 | 4084 | 5598 | 9155 | 10222 | 6270  | 11563 |
| NM_138741    | Sdpr          | 1.342  | -1.098 | 189  | 3823 | 1601 | 877   | 267   | 503   |
| NM_001033633 | Slc2a13       | 0.501  | -1.097 | 5009 | 4788 | 5153 | 10220 | 10903 | 12371 |
| NM_173431    | Rpgrip1l      | -0.351 | -1.096 | 3937 | 3726 | 4995 | 2842  | 2293  | 2400  |
| NM_144888    | D430028G21Rik | -0.226 | -1.095 | 1433 | 2686 | 3317 | 451   | 141   | 369   |
| NM_001039180 | Bicd2         | -0.241 | -1.095 | 5038 | 5429 | 8021 | 1290  | 1060  | 1162  |
| NM_145599    | Tmem184c      | -0.091 | -1.093 | 2698 | 2805 | 3128 | 260   | 362   | 414   |
| NM_023409    | Npc2          | -0.633 | -1.093 | 3829 | 6042 | 3448 | 419   | 607   | 295   |
| NM_009427    | Tob1          | -0.680 | -1.091 | 3775 | 3236 | 3787 | 234   | 119   | 137   |
| NM_007460    | Ap3d1         | 0.317  | -1.091 | 4332 | 8222 | 6561 | 1170  | 1140  | 914   |
| NM_031392    | Wdr6          | -0.746 | -1.089 | 3369 | 2290 | 3690 | 266   | 244   | 185   |
| NM_199200    | Fam171a2      | -0.687 | -1.088 | 5688 | 2475 | 3685 | 2590  | 563   | 317   |
| NM_153150    | Slc25a1       | -0.880 | -1.087 | 3904 | 3777 | 5899 | 246   | 172   | 58    |
| NM_024267    | Ipo4          | -0.425 | -1.086 | 2086 | 2319 | 3378 | 475   | 242   | 167   |
| NM_025442    | Alg5          | 0.192  | -1.086 | 5266 | 5171 | 4241 | 237   | 285   | 122   |
| NM_009397    | Tnfaip3       | -0.452 | -1.085 | 2598 | 3813 | 4378 | 1307  | 523   | 552   |
| NM_009061    | Rgs2          | -0.642 | -1.085 | 1046 | 1695 | 2216 | 1063  | 123   | 128   |
| NM_175334    | Maml1         | -0.131 | -1.082 | 5777 | 5612 | 5359 | 1293  | 681   | 854   |

|              |           |        |        |       |       |       |      |      |       |
|--------------|-----------|--------|--------|-------|-------|-------|------|------|-------|
| NM_199448    | Fez2      | 0.560  | -1.078 | 2189  | 3502  | 2782  | 1293 | 1585 | 1090  |
| NM_145392    | Bag2      | -0.101 | -1.075 | 1523  | 2785  | 3459  | 1066 | 320  | 274   |
| NM_138594    | D6Wsu163e | 0.193  | -1.074 | 2927  | 4918  | 3538  | 723  | 804  | 702   |
| NM_015742    | Myo9b     | 0.465  | -1.071 | 4061  | 4302  | 6246  | 2381 | 2325 | 2966  |
| NM_024190    | Chmp1b    | -0.612 | -1.071 | 3167  | 4230  | 4423  | 167  | 84   | 81    |
| NM_007984    | Fscn1     | -0.741 | -1.070 | 11287 | 12723 | 13289 | 969  | 410  | 350   |
| NM_025931    | Rabl4     | -0.980 | -1.070 | 2091  | 2549  | 3656  | 546  | 648  | 390   |
| NM_199198    | Hdac10    | -0.232 | -1.070 | 2596  | 3109  | 4974  | 400  | 178  | 116   |
| NM_031256    | Plekha3   | 0.176  | -1.068 | 2252  | 3676  | 3184  | 419  | 435  | 421   |
| NM_008062    | G6pdx     | -0.235 | -1.065 | 3524  | 4376  | 3580  | 181  | 347  | 224   |
| NM_007682    | Cenpb     | -0.001 | -1.063 | 4499  | 4852  | 5955  | 146  | 130  | 44    |
| NM_008761    | Fxyd5     | 1.776  | -1.063 | 215   | 1448  | 1249  | 1154 | 200  | 90    |
| NM_153406    | Specc1l   | -0.154 | -1.063 | 2830  | 3191  | 4077  | 1989 | 2644 | 2603  |
| NM_019586    | Ube2j1    | -0.102 | -1.062 | 3151  | 4830  | 2957  | 863  | 365  | 403   |
| NM_007672    | Cdr2      | 0.382  | -1.062 | 3900  | 5974  | 4173  | 560  | 474  | 367   |
| NM_001012517 | Fut10     | 0.492  | -1.061 | 1913  | 2745  | 2537  | 2463 | 1312 | 745   |
| NM_133836    | Il15ra    | -0.824 | -1.061 | 467   | 2823  | 4724  | 2225 | 888  | 544   |
| NM_011864    | Papss2    | -0.322 | -1.058 | 366   | 417   | 293   | 1545 | 1270 | 1229  |
| NM_001033228 | Itga1     | 0.598  | -1.058 | 4498  | 8639  | 8564  | 6100 | 3953 | 4770  |
| NM_172648    | Ifi205    | -0.849 | -1.058 | 20    | 1697  | 1356  | 122  | 181  | 232   |
| NM_024196    | Tbc1d20   | -0.803 | -1.057 | 1859  | 3782  | 4022  | 385  | 281  | 361   |
| NM_011639    | Trip6     | -0.325 | -1.057 | 1526  | 4719  | 6933  | 182  | 141  | 84    |
| NM_009640    | Angpt1    | -0.861 | -1.055 | 821   | 2743  | 3531  | 7363 | 6706 | 10624 |
| NM_019575    | Scamp4    | 0.141  | -1.052 | 5248  | 3681  | 3671  | 509  | 497  | 319   |
| NM_001081170 | Pacs2     | 0.192  | -1.051 | 5441  | 4514  | 4052  | 2104 | 1732 | 962   |
| NM_009367    | Tgfb2     | -0.424 | -1.051 | 2635  | 7886  | 8004  | 4525 | 1792 | 2126  |
| NM_021880    | Prkar1a   | 0.117  | -1.050 | 4186  | 6930  | 6754  | 520  | 435  | 399   |
| NM_011961    | Plod2     | -0.442 | -1.050 | 3477  | 4241  | 6431  | 1546 | 1264 | 1727  |
| NM_016985    | Mtmr1     | -0.150 | -1.050 | 1065  | 1700  | 2296  | 1146 | 369  | 738   |

|              |               |        |        |       |       |       |       |      |      |
|--------------|---------------|--------|--------|-------|-------|-------|-------|------|------|
| NM_175489    | Osbp18        | 0.177  | -1.049 | 3651  | 7123  | 5851  | 3522  | 3569 | 3233 |
| NM_181344    | C1rl          | -0.728 | -1.049 | 303   | 626   | 495   | 749   | 1313 | 309  |
| NM_023041    | Pex19         | -0.614 | -1.046 | 2417  | 3137  | 2833  | 277   | 278  | 218  |
| NM_199146    | AI451617      | -0.748 | -1.044 | 271   | 265   | 408   | 570   | 228  | 274  |
| NM_026609    | Leprot11      | 0.918  | -1.044 | 2574  | 6353  | 2586  | 340   | 326  | 98   |
| NM_009504    | Vdr           | -0.959 | -1.043 | 2336  | 2009  | 2920  | 4515  | 4364 | 2253 |
| NM_016898    | Cd164         | -0.236 | -1.043 | 5771  | 7208  | 7255  | 290   | 295  | 322  |
| NM_009502    | Vcl           | 0.373  | -1.041 | 5357  | 7278  | 7504  | 2164  | 1682 | 2492 |
| NM_010223    | Fkbp8         | -0.897 | -1.036 | 2352  | 2117  | 3209  | 195   | 128  | 217  |
| NM_017366    | Acadvl        | -0.892 | -1.035 | 1346  | 1295  | 2265  | 233   | 141  | 100  |
| NM_133977    | Trf           | 0.181  | -1.032 | 655   | 330   | 436   | 1691  | 739  | 799  |
| NM_013759    | Sepx1         | -0.610 | -1.032 | 1754  | 2445  | 3085  | 194   | 237  | 134  |
| NM_025826    | Acadsb        | -0.880 | -1.031 | 3828  | 3947  | 2962  | 1100  | 637  | 489  |
| NM_008841    | Pik3r2        | -0.606 | -1.030 | 5048  | 4457  | 5917  | 494   | 400  | 208  |
| NM_016858    | Rab33b        | 0.121  | -1.027 | 4295  | 4930  | 3834  | 493   | 350  | 168  |
| NM_145940    | Wipi1         | -0.249 | -1.027 | 2899  | 3896  | 4841  | 1604  | 1212 | 702  |
| NM_207670    | Gripap1       | 0.269  | -1.026 | 852   | 1149  | 1050  | 372   | 412  | 314  |
| NM_011728    | Xpa           | 0.180  | -1.025 | 3803  | 3573  | 2997  | 1026  | 426  | 244  |
| NM_011989    | Slc27a4       | -0.425 | -1.022 | 2887  | 2788  | 3266  | 613   | 384  | 273  |
| NM_145138    | Nek9          | 0.237  | -1.021 | 4302  | 4219  | 3273  | 958   | 1006 | 579  |
| NM_031196    | Slc19a1       | -0.403 | -1.020 | 3757  | 2977  | 3788  | 690   | 513  | 370  |
| NM_178874    | Tmcc2         | 0.283  | -1.019 | 3059  | 3686  | 3724  | 2325  | 1598 | 900  |
| NM_181278    | B230219D22Rik | 0.203  | -1.018 | 3699  | 4066  | 3698  | 201   | 224  | 280  |
| NM_023598    | Arid5b        | -0.055 | -1.018 | 9407  | 14149 | 13544 | 5333  | 4807 | 4681 |
| NM_001033420 | Dock1         | 0.715  | -1.014 | 8172  | 7191  | 7174  | 10765 | 9784 | 6191 |
| NM_176987    | 4732471D19Rik | 0.101  | -1.014 | 2030  | 3182  | 4468  | 1276  | 1184 | 1004 |
| NM_031185    | Akap12        | -0.765 | -1.013 | 10111 | 6499  | 8787  | 1981  | 3472 | 2416 |
| NM_028979    | Cyp2j9        | 1.252  | -1.013 | 192   | 1624  | 597   | 600   | 682  | 551  |
| NM_007853    | Degs1         | -0.578 | -1.013 | 3588  | 3798  | 4311  | 98    | 221  | 183  |

|           |          |        |        |       |       |      |       |      |      |
|-----------|----------|--------|--------|-------|-------|------|-------|------|------|
| NM_152813 | Plcd3    | -0.207 | -1.012 | 2850  | 4420  | 5615 | 2366  | 826  | 471  |
| NM_010591 | Jun      | 0.773  | -1.012 | 10309 | 13230 | 7866 | 807   | 221  | 18   |
| NM_207246 | Rasgrp3  | -0.967 | -1.012 | 340   | 841   | 761  | 3005  | 4077 | 2406 |
| NM_010453 | Hoxa5    | 0.613  | -1.007 | 2322  | 1318  | 2857 | 2212  | 643  | 124  |
| NM_007893 | E4f1     | 0.242  | -1.007 | 2632  | 3187  | 3023 | 373   | 436  | 240  |
| NM_008110 | Gdf9     | -0.518 | -1.006 | 115   | 91    | 117  | 424   | 182  | 184  |
| NM_178883 | Scyl1bp1 | -0.349 | -1.006 | 1571  | 3581  | 4062 | 301   | 487  | 417  |
| NM_199323 | Tacc1    | 0.235  | -1.003 | 4421  | 3048  | 3337 | 1271  | 804  | 493  |
| NM_053207 | Egln1    | -0.356 | -1.002 | 4745  | 6885  | 9186 | 1452  | 1047 | 1001 |
| NM_016866 | Stk39    | 0.625  | -1.002 | 6038  | 4373  | 5638 | 12236 | 5891 | 7560 |
| NM_025468 | Sec11c   | -0.089 | -1.000 | 2595  | 3123  | 3470 | 883   | 385  | 302  |
